# Supplementary material for: Effects of 3D electric field on saltation during dust storms: an observational and numerical study
Source: Copernicus journal article supplement (doi:10.5194/acp-20-14801-2020), 2020-12-02
Supplement: Supplementary file 1 [file acp-20-14801-2020-supplement.zip]

Archive with 3 entries (3 files):
- acp-20-14801-2020-supplement-title-page.pdf
- Supplement.pdf
- ds01.csv
