# Supplementary material for: Effects of 3D electric field on saltation during dust storms: an observational and numerical study
Source: Copernicus journal article supplement (doi:10.5194/acp-20-14801-2020), 2020-12-02
Supplement: Supplementary file 1 [file acp-20-14801-2020-supplement.zip › acp-20-14801-2020-supplement-title-page.pdf]

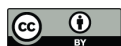

## *Supplement of*

# **Effects of 3D electric field on saltation during dust storms: an observational and numerical study**

**Huan Zhang and You-He Zhou**

*Correspondence to:* You-He Zhou (zhouyh@lzu.edu.cn)

- [acp-20-14801-2020-supplement-title-page.pdf](#)
- [Supplement.pdf](#)
- [ds01.csv](#)

The copyright of individual parts of the supplement might differ from the CC BY 4.0 License.
