# Supplementary material for: Effects of 3D electric field on saltation during dust storms: an observational and numerical study
Source: Copernicus journal article supplement (doi:10.5194/acp-20-14801-2020), 2020-12-02
Supplement: Supplementary file 1 [file acp-20-14801-2020-supplement.zip › ds01.csv]

Local Time	E1(1)	E1(2)	E1(3)	E1(4)	E1(5)	E2(1)	E2(2)	E2(3)	E2(4)	E2(5)	E3(1)	E3(2)	E3(3)	E3(4)	E3(5)
12:30:01	-1.7187	3.9628	-2.6665	67.586	-25.653	-0.01346	2.25	-1.9045	-4.5559	-29.102	1.2868	8.187	9.052	24.206	16.452
12:30:02	-1.1357	3.0845	-2.5268	60.465	-28.026	-0.35059	1.9606	-2.1167	-7.0702	-30.285	3.3235	9.7905	10.048	26.165	17.29
12:30:03	-1.7951	4.3402	-2.3183	42.4	-24.469	0.74453	1.8136	-0.89809	-8.3545	-27.354	0.93909	5.8709	7.3925	22.464	15.853
12:30:04	-1.1741	3.5228	-2.594	-102.42	-23.904	0.22722	-1.2028	-1.8919	-33.438	-26.87	1.7339	8.3652	8.0563	22.9	17.41
12:30:05	-1.0455	3.3325	-2.9013	-134.68	-25.765	0.1765	-1.8746	-3.4824	-39.487	-28.35	3.2242	8.7215	9.218	24.423	17.41
12:30:06	-1.7187	3.0247	-2.6565	-111.6	-23.725	-0.01346	-1.4718	-2.2575	-34.969	-26.762	1.1875	8.7215	9.7158	25.077	17.29
12:30:07	-0.78389	4.265	-2.8124	-0.94002	-22.017	0.36804	0.93365	-2.7575	-13.964	-24.768	2.8268	8.7215	7.7244	22.247	16.811
12:30:08	-1.4442	5.3017	-1.7897	95.939	-18.021	0.25338	3.03	-0.68804	4.7113	-21.143	2.181	6.4054	6.0649	19.416	15.014
12:30:09	-1.248	7.2003	-0.50757	128.47	-15.531	2.5895	3.9984	1.663	12.341	-17.394	-0.05443	3.911	2.58	14.41	11.06
12:30:10	-1.2383	5.2724	-1.7797	110.01	-16.59	0.65444	3.2986	-1.041	8.7523	-18.889	3.0255	6.2272	5.733	18.11	12.138
12:30:11	-0.78389	4.7764	-2.0644	-9.6736	-17.874	0.36804	0.83996	-0.854	-12.862	-19.344	1.7339	7.6525	6.8947	20.287	12.138
12:30:12	-1.4357	4.9527	-1.8985	-92.23	-16.276	0.03568	-0.77195	-0.70694	-26.047	-17.524	1.6346	8.5434	6.8947	20.287	13.696
12:30:13	-1.1614	4.2699	-1.8939	-87.576	-15.6	-0.50119	-0.79926	-1.2974	-24.92	-17.329	3.3235	6.5835	6.7287	19.852	12.378
12:30:14	-1.0241	4.7148	-1.9865	-4.9633	-17.655	0.03409	0.92052	-0.60398	-11.405	-18.534	1.3862	8.187	6.8947	20.505	12.138
12:30:15	-1.1013	6.5015	-0.99454	128.52	-15.971	1.3044	3.877	1.6966	12.604	-18.088	1.0881	3.5547	4.5714	17.24	10.221
12:30:16	-0.60396	5.3017	-1.3281	96.017	-20.509	-0.1852	3.03	-0.25317	5.1721	-20.65	2.9261	6.9399	6.5628	20.723	12.018
12:30:17	-1.9931	4.6966	-2.2829	100.47	-19.87	-0.28031	3.0161	-1.7196	5.1146	-22.081	1.2372	8.3652	7.5585	22.029	13.576
12:30:18	-1.1806	4.1391	-2.3401	-14.485	-20.519	-0.23593	0.63804	-1.8478	-14.911	-22.117	1.9823	8.187	8.0563	22.247	14.415
12:30:19	-2.3748	3.9404	-2.2621	-115.59	-19.636	-0.63882	-1.404	-1.5978	-32.212	-21.655	3.1745	8.5434	7.5585	22.029	13.935
12:30:20	-1.5381	5.0573	-1.6029	-62.221	-14.471	0.80846	-0.16066	-0.41913	-20.134	-15.899	1.4359	5.3364	5.4011	18.763	12.498
12:30:21	-1.7717	7.0877	-0.81403	96.693	-13.191	0.61032	3.3401	0.90029	9.1223	-14.057	1.0384	4.2674	2.9119	15.28	10.58
12:30:22	-1.7163	6.3353	-1.4315	103.32	-14.512	0.22405	3.3463	-0.03464	8.7398	-16.137	2.9758	6.7617	5.4011	17.893	10.461
12:30:23	-1.3756	5.6739	-1.7171	91.746	-15.575	0.11917	3.0033	-0.67545	6.283	-16.245	1.6842	6.2272	5.4011	17.675	10.7
12:30:24	-0.86533	5.5613	-1.8885	59.484	-16.357	0.42696	2.345	-1.0599	0.23344	-18.463	1.3365	7.118	5.899	18.981	10.341
12:30:25	-1.1571	4.1226	-2.3301	-85.547	-18.219	-0.20818	-0.77921	-2.2008	-26.101	-19.481	3.1248	7.4744	6.8947	21.376	11.539
12:30:26	-1.3413	5.4186	-1.6546	-92.286	-16.344	0.05206	-0.69105	-0.30986	-26.377	-17.921	1.9326	6.049	5.2352	18.11	11.419
12:30:27	-1.1848	6.8383	-0.82945	25.226	-15.173	1.8692	1.8824	1.0159	-4.4377	-16.715	0.44233	4.0892	2.9119	14.845	10.101
12:30:28	-1.6671	5.682	-1.8577	93.966	-16.373	0.28773	3.0504	-1.2911	6.2213	-17.617	2.5287	7.2962	5.733	18.763	11.179
12:30:29	-1.3376	5.8292	-2.1016	91.532	-18.496	0.01453	3.0303	-1.6882	5.0321	-19.22	2.4791	6.4054	6.7287	20.07	11.179
12:30:30	-1.946	4.6589	-2.1895	45.341	-19.292	-0.27212	1.9146	-1.5852	-4.2026	-21.055	1.3365	6.7617	7.3925	21.376	13.097
12:30:31	-1.5339	4.6742	-2.0807	-83.181	-18.976	0.53502	-0.63781	-1.5663	-25.307	-20.615	2.032	7.8307	6.7287	20.287	13.216
12:30:32	-1.0068	5.0625	-1.7326	-83.181	-17.324	0.40239	-0.57039	-0.55989	-25.307	-18.477	2.5287	5.8709	5.733	20.07	11.898
12:30:33	-1.4561	6.5064	-1.0217	41.093	-17.201	0.97862	2.1441	0.5095	-2.9601	-17.761	1.1875	4.2674	3.7416	18.763	10.58
12:30:34	-1.4857	5.2776	-2.049	89.222	-18.647	0.52524	2.8889	-0.96957	4.5671	-19.632	1.3862	6.9399	6.0649	19.199	12.018
12:30:35	-1.8171	5.5963	-1.9865	91.487	-18.233	0.48086	2.9898	-0.60398	4.7688	-19.56	2.6281	7.6525	6.3968	20.287	13.097
12:30:36	-1.4414	5.1031	-1.8831	-4.952	-17.517	-0.16063	0.98794	-0.82251	-11.339	-18.664	2.8765	6.9399	6.3968	19.852	13.097
12:30:37	-1.4357	4.8589	-2.0807	-96.895	-16.249	0.03568	-0.87948	-1.5663	-27.241	-17.365	1.7836	7.2962	6.3968	19.852	12.018
12:30:38	-1.2813	4.6074	-2.029	-57.713	-16.374	0.13555	-0.14752	-1.6756	-19.862	-17.155	1.4359	7.2962	6.3968	19.634	11.659
12:30:39	-1.4939	7.4225	-0.8086	103.45	-13.342	1.7023	3.5351	1.1377	9.5298	-14.469	1.5849	4.2674	3.2438	14.192	9.5019
12:30:40	-1.5171	6.3595	-1.1359	110.34	-13.977	0.0946	3.4874	0.25318	10.662	-14.887	2.5287	5.1582	5.0692	17.022	10.7
12:30:41	-1.432	6.2199	-1.6446	48.282	-13.217	0.45813	2.2313	-0.66285	-0.05077	-14.678	1.7339	6.4054	5.0692	17.893	10.461
12:30:42	-1.0926	4.7278	-1.8939	-89.841	-15.535	0.16831	-0.76538	-1.2974	-25.122	-16.006	1.5849	7.118	6.0649	20.287	10.58
12:30:43	-1.5086	5.2982	-1.7951	-59.798	-13.644	-0.12311	-0.07319	-0.92548	-19.01	-15.292	2.33	7.118	5.899	18.763	10.58
12:30:44	-1.3876	5.8264	-1.5612	68.938	-14.239	0.30754	2.5736	-0.17539	3.3444	-15.01	2.4791	6.4054	5.4011	17.24	10.101
12:30:45	-1.3552	7.7306	-0.25823	147.25	-11.935	1.4632	4.4555	2.2975	17.773	-13.761	1.1875	3.3765	2.4141	14.192	7.7046
12:30:46	-0.82254	5.9254	-1.1096	52.801	-13.742	0.14215	2.2714	0.61247	0.28676	-14.924	1.0881	6.2272	4.9033	16.586	9.5019
12:30:47	-1.2685	5.0999	-1.8885	-94.45	-15.244	0.26659	-0.79201	-1.0599	-25.986	-16.187	1.8829	7.2962	6.2309	20.07	10.94
12:30:48	-1.7016	5.3546	-1.9256	-43.807	-14.388	-0.44887	0.25597	-1.8941	-16.808	-15.884	2.6281	6.9399	5.5671	18.981	10.221
12:30:49	-1.1269	5.2133	-2.0544	70.888	-17.173	0.23541	2.5127	-1.207	1.7027	-18.065	2.5287	6.7617	6.7287	18.328	10.82
12:30:50	-0.67252	4.8491	-1.9402	77.739	-16.992	-0.05099	2.5864	-0.95067	2.6369	-18.419	1.4359	7.118	6.5628	21.593	11.419
12:30:51	-0.77078	6.4875	-0.92742	13.822	-14.556	1.2471	1.5933	1.4718	-5.907	-14.988	0.98877	5.6927	3.7416	17.022	9.7416
12:30:52	-0.57383	5.5473	-1.2756	-55.133	-13.743	0.2584	0.06131	0.46541	-17.817	-14.461	1.8333	6.049	4.4054	17.24	10.58
12:30:53	-0.78601	6.0244	-1.5666	36.799	-13.756	0.60054	1.9692	-0.41283	-1.9809	-14.541	2.7274	6.2272	5.4011	17.457	11.06
12:30:54	-1.3542	5.7061	-1.6292	101.2	-14.323	-0.02324	3.1914	-0.77842	9.394	-14.562	2.33	6.2272	5.899	18.328	10.58
12:30:55	-1.0883	5.9415	-1.7326	57.466	-13.398	0.46131	2.3654	-0.55989	1.4802	-14.324	1.5849	6.5835	6.5628	16.804	9.7416
12:30:56	-0.61248	4.6662	-1.8314	-85.164	-15.328	0.0325	-0.68482	-0.93178	-23.862	-15.739	1.6346	7.2962	6.5628	20.287	10.461
12:30:57	-0.96024	6.8918	-0.69351	18.532	-12.336	1.3879	1.7548	2.2219	-4.4502	-13.754	1.5352	4.4455	4.0736	15.063	9.0226
12:30:58	-0.76227	6.7184	-1.1613	124.25	-12.971	1.0293	3.8235	0.72174	13.715	-13.71	2.181	5.3364	3.4098	17.675	8.9028
12:30:59	-0.85582	6.2468	-1.5041	78.302	-13.44	0.07345	2.8291	-0.04724	5.9288	-14.1	2.1313	6.049	5.0692	17.675	9.7416
12:31:00	-0.95114	5.7481	-1.5775	-64.17	-11.73	0.19288	-0.08633	-0.88769	-18.492	-13.032	1.6346	6.4054	5.2352	17.893	9.9812
12:31:01	-1.5215	5.7456	-1.5358	-20.402	-11.056	-0.19841	0.78013	-0.64395	-10.381	-11.912	1.5352	6.7617	4.5714	16.804	9.1424
12:31:02	-0.60374	6.6862	-1.2447	115.19	-11.497	0.61851	3.6354	0.23429	12.908	-12.143	2.0816	6.049	3.7416	16.151	7.8244
12:31:03	-0.98304	7.8215	-0.513	129.25	-9.2642	1.9953	4.1063	1.4255	16.884	-10.367	1.7339	3.7329	0.42268	14.627	8.3037
12:31:04	-1.3501	5.8338	-1.5883	-61.917	-13.07	-0.53395	-0.02582	-1.3625	-18.356	-12.879	2.2803	6.5835	3.0779	15.933	9.5019
12:31:05	-1.4787	5.5903	-1.5303	-20.729	-12.819	-0.48322	0.75316	-0.40653	-12.29	-13.761	1.8829	5.8709	4.9033	17.24	8.4235
12:31:06	-1.1039	6.279	-1.3381	87.419	-14.157	-0.02642	3.0172	0.09982	7.0647	-14.533	1.5352	6.4054	5.2352	16.804	9.0226
12:31:07	-1.0112	5.7246	-1.7688	61.951	-15.19	0.10939	2.419	-0.56619	1.6202	-15.869	2.0816	7.118	6.0649	18.328	9.6217
12:31:08	-1.3455	5.7774	-1.66	-78.2	-13.782	0.56276	-0.35499	-0.54729	-22.27	-15.162	2.2307	6.4054	5.2352	18.11	9.1424
12:31:09	-1.2348	7.4008	-0.82403	52.992	-14.626	1.3945	2.5276	1.2533	1.406	-14.923	1.6842	3.911	1.9162	14.192	7.9442
12:31:10	-1.1738	5.832	-1.6029	114.88	-14.377	0.74294	3.487	-0.41913	11.131	-14.88	1.9823	6.7617	5.899	20.287	9.7416
12:31:11	-1.6029	4.9667	-2.0599	22.634	-16.291	-0.13949	1.5118	-1.4444	-6.5486	-17.14	1.8829	7.4744	6.0649	19.199	10.82
12:31:12	-1.8732	4.393	-2.2829	-96.85	-16.292	-0.91704	-0.96039	-1.7196	-26.977	-16.678	1.7339	7.118	6.2309	19.199	11.779
12:31:13	-1.4712	6.0646	-1.5095	48.417	-12.653	0.1078	2.2043	-0.28466	0.73927	-13.732	1.7836	6.2272	5.2352	17.24	10.7
12:31:14	-1.5303	6.9219	-1.2139	138.24	-11.814	0.1831	4.1326	0.00315	17.295	-12.583	1.7339	5.5145	4.0736	15.498	8.5433
12:31:15	-1.6194	6.8142	-0.8086	18.78	-10.298	0.87875	1.7413	1.1377	-3.0018	-11.24	1.4359	3.911	2.4141	14.192	6.8658
12:31:16	-0.88258	6.1685	-1.3281	-54.907	-11.057	0.05866	0.16918	-0.25317	-16.5	-11.449	2.2803	6.7617	4.5714	15.933	8.6631
12:31:17	-1.3759	6.038	-1.4578	85.188	-13.263	-0.0428	2.9297	-0.39393	7.0605	-13.067	2.1313	6.7617	4.9033	17.457	8.1838
12:31:18	-1.2256	6.5281	-1.281	92.141	-11.703	-0.07397	3.1517	0.22799	8.5873	-12.873	2.032	6.049	5.0692	16.151	8.6631
12:31:19	-1.6929	4.768	-1.9982	-78.155	-14.584	0.13713	-0.53028	-1.9067	-22.006	-15.147	1.9326	7.118	5.899	18.763	9.1424
12:31:20	-0.65091	5.9814	-1.4369	2.4064	-13.329	0.61032	1.2773	-0.27207	-7.4421	-14.389	1.5352	6.9399	4.0736	15.933	9.2623
12:31:21	-1.2363	7.4735	-0.77233	140.38	-12.848	1.293	4.274	1.144	16.773	-13.457	0.83974	4.6237	1.5843	15.716	6.3865
12:31:22	-1.3282	5.5291	-1.3498	50.457	-15.632	0.93106	2.1569	-1.2029	-0.37578	-15.638	1.8829	6.7617	4.7373	17.893	9.5019
12:31:23	-1.5258	4.9527	-2.0136	-92.241	-15.725	-0.49141	-0.77195	-1.7911	-26.113	-17.119	2.33	6.9399	6.3968	19.416	10.94
12:31:24	-0.5996	5.4808	-1.6346	36.664	-14.691	0.1078	1.8748	-1.0158	-2.7709	-16.246	2.2803	6.7617	5.733	17.893	10.101
12:31:25	-1.1184	6.1265	-1.7697	110.33	-14.819	0.01771	3.4469	-1.394	10.596	-15.111	2.2803	6.4054	5.5671	17.24	9.5019
12:31:26	-1.4357	5.8663	-1.5512	13.743	-14.817	0.03568	1.4855	-0.5284	-6.3678	-15.573	1.9823	5.6927	4.9033	17.24	10.461
12:31:27	-1.1699	6.0321	-1.1305	-27.783	-16.609	1.8544	0.693	0.49061	-14.409	-17.118	1.2868	2.842	3.5757	16.369	9.0226
12:31:28	-0.54785	5.8264	-1.7743	68.668	-18.276	1.2127	2.5736	-0.80361	1.7644	-18.873	1.7836	7.2962	5.2352	18.328	10.58
12:31:29	-1.7658	5.3553	-1.9456	89.312	-17.284	-0.02165	2.9024	-1.1881	5.0938	-17.776	1.7836	7.2962	6.0649	19.852	11.898
12:31:30	-1.1313	4.8484	-1.9873	-55.482	-17.769	-0.05759	-0.06005	-1.4318	-19.858	-17.32	1.9823	7.8307	6.2309	19.634	12.617
12:31:31	-0.71969	5.0037	-1.9302	-55.425	-16.579	-0.05918	-0.03308	-1.3037	-19.529	-17.885	1.9823	7.4744	6.3968	19.634	11.659
12:31:32	-1.0839	5.8827	-1.65	84.838	-16.388	0.75431	2.9027	-0.90028	5.0196	-17.234	1.5849	5.8709	5.0692	17.893	11.06
12:31:33	-0.75812	6.8467	-1.6075	94.214	-15.605	0.51864	3.2526	0.1713	7.6697	-15.479	1.4359	2.842	3.9076	16.586	10.94
12:31:34	-0.51379	4.7438	-2.1478	-85.367	-16.594	0.34188	-0.67134	-1.3415	-25.047	-17.502	2.2803	6.9399	6.0649	19.634	11.179
12:31:35	-1.4313	4.9611	-2.0907	-23.264	-17.684	0.32868	0.59827	-1.2133	-14.072	-18.231	2.3797	7.2962	6.0649	20.287	11.659
12:31:36	-1.5686	5.8373	-1.7634	94.023	-16.499	-0.2066	3.0773	-0.32875	6.5505	-16.945	2.2307	6.9399	5.899	17.893	11.419
12:31:37	-0.53955	5.3577	-1.8577	45.713	-16.72	0.19129	2.0359	-1.2911	-2.03	-16.829	2.33	6.9399	6.5628	20.07	11.179
12:31:38	-0.89961	5.5364	-1.369	-80.69	-17.105	0.49407	-0.44246	0.33095	-23.788	-17.667	2.3797	5.8709	5.4011	18.763	11.179
12:31:39	-0.74087	5.8369	-1.4515	27.39	-15.945	0.88694	1.7541	0.67135	-4.8286	-17.466	1.3862	4.2674	4.4054	17.022	9.8614
12:31:40	-0.51379	5.4329	-1.8105	89.2	-19.285	0.34188	2.9159	-0.80991	4.4354	-18.663	1.9823	7.2962	6.2309	20.287	13.816
12:31:41	-1.2171	4.8621	-2.0961	-7.4311	-18.811	-0.29167	0.90046	-1.4507	-12.792	-20.123	2.181	7.4744	6.5628	21.593	12.617
12:31:42	-1.7658	4.0583	-2.2367	-103.88	-18.177	-0.02165	-1.1554	-2.0663	-28.965	-19.705	2.1313	7.118	6.7287	21.593	13.336
12:31:43	-0.55243	5.5907	-1.6446	45.589	-17.162	0.11599	2.0764	-0.66285	-2.7542	-17.06	1.9823	6.4054	5.899	20.07	11.779
12:31:44	-1.0123	6.9163	-1.1296	91.949	-13.465	1.0441	3.2191	1.3185	7.468	-15.184	1.4855	4.4455	3.5757	15.28	10.461
12:31:45	-0.81359	6.0884	-0.95912	-11.59	-14.279	1.5319	1.0222	0.87509	-11.022	-15.248	1.4359	4.8019	4.7373	16.151	9.5019
12:31:46	-0.71969	5.3598	-1.728	-64.52	-15.438	-0.05918	-0.15375	-1.1503	-20.533	-15.912	2.1313	6.5835	4.5714	19.199	10.101
12:31:47	-0.72384	6.0541	-1.6292	89.459	-14.898	0.45153	3.0237	-0.77842	5.9496	-16.513	2.1313	6.5835	5.5671	18.328	10.341
12:31:48	-1.6586	5.3364	-1.816	61.861	-16.18	0.07003	2.3516	-1.0473	1.0935	-17.43	2.032	7.6525	5.899	19.634	10.82
12:31:49	-1.1571	4.8992	-1.8785	-85.22	-15.768	-0.20818	-0.64437	-1.4129	-24.191	-16.433	1.9823	7.118	5.899	19.852	10.7
12:31:50	-1.0648	5.711	-1.3481	13.574	-16.127	1.4698	1.4585	0.45281	-7.3554	-16.649	1.6842	5.3364	4.7373	18.328	10.221
12:31:51	-1.1511	7.0905	-1.1568	119.31	-16.262	0.89354	3.7968	0.13131	10.942	-17.907	1.4855	4.98	4.5714	17.022	10.221
12:31:52	-1.6243	4.5595	-2.0499	-5.2111	-18.632	0.00292	0.89355	-1.7974	-12.853	-20.015	2.181	7.2962	7.7244	21.376	11.419
12:31:53	-0.83979	4.0744	-2.1587	-99.374	-17.42	-0.22615	-1.0613	-1.8163	-28.693	-18.571	2.1313	7.4744	7.0606	20.94	12.378
12:31:54	-0.83542	5.0712	-1.9873	52.418	-18.398	0.06685	2.123	-1.4318	-1.9517	-19.589	2.1313	7.118	5.899	21.811	12.498
12:31:55	-1.6671	5.0419	-2.0599	66.02	-19.306	0.28773	2.3917	-1.4444	-0.67576	-21.135	2.181	7.4744	6.7287	20.723	12.138
12:31:56	-0.98542	4.5592	-1.6754	-71.788	-18.08	0.25998	-0.42966	-0.43172	-23.903	-19.611	1.7836	5.8709	5.733	20.723	12.378
12:31:57	-1.0819	5.5155	-1.3844	1.708	-19.845	1.3945	1.1964	0.44652	-11.524	-20.997	1.2372	5.8709	6.2309	19.416	10.7
12:31:58	-1.0756	3.9628	-2.2775	67.992	-22.351	-0.2671	2.25	-1.4822	-2.1858	-23.901	2.2307	8.0089	8.7201	23.117	13.696
12:31:59	-1.6459	3.8257	-2.1116	-37.733	-21.843	-0.65838	0.12736	-1.3352	-20.417	-22.81	2.2307	7.4744	8.0563	23.117	14.894
12:32:00	-1.7658	2.9016	-2.6819	-102.45	-25.548	-0.02165	-1.3106	-1.7889	-33.635	-27.078	2.1313	8.7215	8.8861	25.512	15.014
12:32:01	-1.3975	3.7351	-2.5214	46.897	-26.609	-1.3458	1.7998	-1.8793	-8.1487	-28.111	2.33	8.7215	8.5541	25.73	16.572
12:32:02	-1.4712	3.5448	-2.5368	14.859	-24.639	0.38442	1.128	-1.7637	-12.881	-25.995	2.0816	7.8307	9.052	24.859	16.931
12:32:03	-1.5701	4.2164	-1.4832	-81.648	-24.457	2.316	-0.67169	0.07463	-29.384	-26.812	1.4359	5.3364	7.3925	22.464	15.134
12:32:04	-1.53	3.5396	-2.4017	35.414	-26.842	0.0193	1.5377	-1.3855	-10.079	-28.537	2.4294	7.8307	8.5541	24.423	17.53
12:32:05	-1.6501	3.1807	-2.6928	21.485	-27.752	-0.14768	1.2016	-2.2638	-13.264	-29.158	2.1313	8.7215	8.7201	26.165	17.41
12:32:06	-1.4398	2.0659	-2.9575	-142	-28.837	0.54638	-2.2314	-2.7827	-43.187	-31.737	2.33	9.0778	10.048	27.471	18.009
12:32:07	-1.0712	3.3654	-2.7907	7.7035	-27.326	0.0259	0.95994	-1.8078	-15.593	-28.544	2.2803	8.5434	9.7158	26.383	18.489
12:32:08	-0.73673	3.968	-2.3392	46.84	-27.42	0.37623	1.8402	-1.02	-8.4778	-29.563	1.8829	7.2962	8.7201	24.423	17.051
12:32:09	-1.2245	3.3031	-2.5314	-121.26	-30.135	0.5514	-1.6059	-1.5263	-39.265	-31.808	1.8829	6.7617	8.3882	26.165	17.77
12:32:10	-1.7529	2.096	-3.352	-22.869	-34.103	0.05365	0.14639	-3.4424	-24.799	-35.737	2.3797	9.256	11.209	29.213	19.687
12:32:11	-1.9331	1.4535	-3.5696	-7.0246	-35.766	-0.19682	0.3542	-3.4802	-23.453	-38.88	2.5287	10.147	11.873	31.39	21.364
12:32:12	-1.9289	1.0456	-3.7047	-167.93	-34.751	-0.70752	-2.9104	-3.8584	-23.999	-36.235	2.5784	10.325	13.035	31.172	23.521
12:32:13	-1.4272	3.4269	-2.6828	3.2972	-25.957	-0.18203	0.87938	-2.6168	-15.272	-29	2.2803	8.7215	9.218	25.077	21.364
12:32:14	-1.7605	5.3766	-1.4624	72.86	-19.776	1.3371	2.5867	0.19649	0.19264	-21.062	1.6842	6.049	5.5671	19.852	17.77
12:32:15	-1.7624	3.8575	-2.039	-95.249	-21.423	1.288	-1.0078	-1.3226	-30.66	-25.051	1.9326	5.6927	6.2309	20.505	15.253
12:32:16	-1.0197	3.9439	-2.6048	40.293	-22.336	0.32709	1.6992	-2.3667	-7.6345	-24.284	2.2803	7.8307	8.7201	23.335	15.853
12:32:17	-1.4143	3.6438	-2.7291	-1.0189	-23.289	-0.10673	0.82578	-2.2701	-14.425	-24.68	2.7274	8.5434	9.5498	24.641	15.373
12:32:18	-1.6457	2.4329	-3.1289	-125.44	-25.01	0.14532	-1.8483	-3.1672	-37.627	-26.753	2.2307	7.6525	8.5541	25.512	16.092
12:32:19	-1.1996	4.4661	-2.2204	56.531	-21.414	0.88034	2.1092	-1.3541	-3.9843	-23.121	1.8333	8.7215	7.7244	22.682	15.373
12:32:20	-1.3198	5.0814	-1.5041	-55.696	-18.492	1.2209	-0.01959	-0.04724	-21.109	-20.608	1.6842	5.1582	5.733	18.763	13.576
12:32:21	-1.4699	3.748	-2.5523	-37.778	-22.589	0.10279	0.11387	-1.6482	-20.68	-22.939	1.8829	8.3652	7.3925	22.9	14.295
12:32:22	-1.663	3.5235	-2.7345	30.951	-25.49	-0.22298	1.4437	-2.5075	-10.087	-28.148	2.2307	8.3652	9.3839	25.077	15.733
12:32:23	-1.7272	2.3846	-3.0147	-139.39	-27.99	0.20424	-2.1304	-2.9109	-40.944	-28.196	2.2803	8.7215	10.546	26.165	16.332
12:32:24	-1.7702	2.8512	-3.0764	-6.146	-29.004	-0.31465	0.59691	-2.4486	-18.318	-31.303	2.6281	8.8997	10.214	27.253	17.41
12:32:25	-1.6844	2.6718	-3.0818	-13.234	-29.738	-0.08057	0.42887	-2.6861	-20.634	-30.428	1.9823	8.8997	9.7158	27.253	18.129
12:32:26	-0.98958	2.9016	-2.4743	-102.97	-30.366	0.77069	-1.3106	-1.3981	-36.664	-33.16	1.7836	7.6525	8.3882	27.471	18.728
12:32:27	-1.7573	2.9397	-2.8741	18.972	-28.968	-0.23936	1.1142	-2.2953	-14.914	-29.215	2.33	9.0778	10.546	26.818	19.687
12:32:28	-1.7573	2.4063	-3.0509	-88.871	-28.813	-0.23936	-1.1229	-2.9172	-32.491	-30.19	2.6281	9.4342	10.546	28.995	20.046
12:32:29	-1.7617	2.7732	-2.817	-72.711	-27.577	-0.53236	-0.73979	-2.1671	-29.302	-27.662	2.4294	9.4342	9.5498	26.6	19.088
12:32:30	-1.6416	2.7764	-2.8642	16.843	-28.425	-0.36538	1.0402	-2.6483	-14.326	-30.74	2.33	9.7905	10.711	26.818	18.369
12:32:31	-1.4485	2.7113	-2.5577	-134.79	-26.623	-0.03962	-1.9824	-1.8856	-40.146	-27.728	2.181	8.187	10.38	27.036	18.848
12:32:32	-1.6523	4.924	-1.5766	54.131	-23.425	1.8069	2.1431	-0.05984	-4.976	-25.475	1.3862	5.3364	4.0736	21.593	16.092
12:32:33	-1.3756	3.7722	-2.5114	-30.938	-23.496	0.11917	0.25494	-2.2323	-19.812	-24.485	1.9326	8.0089	7.5585	24.423	17.41
12:32:34	-1.5215	3.4238	-2.5631	-86.11	-23.634	-0.19841	-0.90056	-2.123	-29.393	-24.817	2.181	8.187	9.218	24.859	16.092
12:32:35	-1.44	3.6949	-2.5631	35.616	-25.204	-0.25732	1.5647	-2.123	-8.8937	-26.478	2.1313	7.8307	9.218	24.641	16.811
12:32:36	-1.6029	2.6819	-2.7399	-120.94	-26.872	-0.13949	-1.7138	-2.7449	-37.421	-27.771	2.3797	8.7215	8.7201	25.947	16.332
12:32:37	-1.2341	2.8753	-2.3909	0.76186	-27.473	0.14374	0.73797	-0.91069	-17.054	-30.343	2.181	7.4744	8.2223	25.73	16.572
12:32:38	-1.0411	3.1349	-2.3138	-36.11	-28.251	0.4695	0.05302	-1.4885	-23.968	-28.782	1.7836	7.118	9.8817	25.512	16.452
12:32:39	-1.916	1.7207	-3.0981	-107.54	-30.159	-0.63223	-1.6069	-3.3983	-37.33	-33.355	2.5784	9.6123	10.711	27.907	19.807
12:32:40	-1.6844	3.0495	-2.8642	28.213	-29.946	-0.08057	1.3157	-2.6483	-13.054	-30.233	2.0816	8.8997	9.052	26.383	18.728
12:32:41	-1.8431	1.6536	-3.3265	-148.95	-31.166	-0.47344	-2.4399	-3.911	-44.648	-33.607	2.2307	9.4342	11.209	27.689	20.646
12:32:42	-1.4785	2.9985	-3.1081	-8.5687	-29.958	0.32049	0.57685	-3.0454	-19.441	-30.775	2.032	8.8997	10.711	27.036	19.567
12:32:43	-1.7305	3.9142	-2.1161	-12.964	-28.193	1.0293	0.64461	-0.74473	-19.054	-29.851	1.5849	5.8709	6.7287	24.641	18.489
12:32:44	-1.0025	2.7036	-2.516	-70.582	-29.764	0.69539	-0.70625	-1.6419	-29.89	-31.05	1.9823	7.118	8.3882	25.947	18.249
12:32:45	-1.6158	2.372	-3.0972	11.896	-31.984	-0.21479	0.87869	-2.5705	-17.165	-32.746	2.6281	9.4342	11.707	28.124	20.046
12:32:46	-1.7702	0.82878	-3.8135	-163.27	-36.994	-0.31465	-2.8568	-3.8773	-21.388	-39.479	2.6778	10.86	12.371	31.39	21.125
12:32:47	-1.8601	0.55107	-4.2279	-21.415	-42.4	-0.03803	-0.07626	-3.831	-29.337	-42.886	2.5784	11.038	13.201	35.09	22.922
12:32:48	-1.8302	0.01765	-4.052	-129.28	-41.14	-0.39814	-2.3133	-4.037	-47.046	-43.978	2.33	11.394	14.362	36.614	25.798
12:32:49	-1.7691	3.2314	-2.3546	-8.7377	-31.197	1.6907	0.6173	-0.90439	-20.429	-32.379	1.3365	6.4054	9.3839	25.294	23.042
12:32:50	-1.4828	2.2164	-2.6557	-54.636	-31.155	0.02749	-0.47147	-1.4296	-27.952	-32.603	1.7339	8.187	9.7158	27.689	22.922
12:32:51	-1.8818	1.6028	-2.9992	-119.2	-32.947	-0.69933	-1.8555	-3.0265	-40.248	-34.148	2.3797	9.4342	11.375	30.301	21.964
12:32:52	-1.7573	1.8124	-3.4037	6.9375	-35.688	-0.23936	0.69026	-3.3332	-20.07	-37.015	2.6281	9.9687	12.537	30.301	21.604
12:32:53	-2.199	0.6413	-3.6938	-172.71	-37.694	-0.68137	-3.0719	-3.3836	-27.175	-41.22	2.4294	10.681	12.703	31.825	21.844
12:32:54	-1.8689	1.2286	-3.6259	-5.0749	-39.132	-0.62404	0.36077	-2.7805	-25.095	-40.698	2.5784	10.86	12.205	31.607	23.521
12:32:55	-1.0839	1.6189	-3.0501	-115.26	-37.777	0.75431	-1.7615	-2.0893	-43.334	-41.234	1.6346	7.4744	11.375	30.083	22.683
12:32:56	-2.1733	0.21878	-4.0212	-71.866	-40.883	-0.53077	-1.1377	-4.2681	-37.395	-42.005	2.0816	9.9687	13.367	34.002	24.6
12:32:57	-2.4263	-0.65428	-4.1508	-99.756	-43.012	-0.94001	-1.8368	-4.4089	-43.963	-46.463	2.181	10.86	13.865	35.744	25.319
12:32:58	-2.5807	-1.7309	-4.7629	-141.77	-48.956	-1.0399	-2.8451	-5.1064	-37.447	-50.194	2.3797	12.641	18.179	40.75	27.835
12:32:59	-2.5678	-2.1188	-4.9451	-75.291	-50.879	-0.96459	-1.5893	-5.9657	-44.378	-54.385	2.7274	13.532	19.009	42.71	29.872
12:33:00	-2.2591	-0.91976	-4.4147	-176.05	-47.026	-0.76485	-3.3886	-4.1	-40.796	-48.779	2.5784	12.285	16.188	39.227	31.789
12:33:01	-1.3199	0.28873	-3.5325	-7.8356	-43.852	-0.09035	0.15194	-2.6461	-28.193	-47.611	2.181	8.8997	14.03	33.131	29.153
12:33:02	-2.3106	-1.8383	-4.7112	-194.64	-47.603	-1.066	-3.9131	-5.2156	-37.704	-49.805	3.1745	12.463	18.345	40.75	31.909
12:33:03	-2.2933	-0.9271	-4.5507	-44.91	-47.17	-0.69775	-0.78921	-5.306	-36.292	-51.504	2.8268	12.285	15.69	39.662	31.19
12:33:04	-2.4477	-2.1139	-4.9197	-162.48	-48.153	-0.7976	-3.3222	-6.4343	-35.746	-50.672	2.5287	13.176	17.847	40.315	32.268
12:33:05	-2.6407	-0.88442	-4.5561	-77.015	-45.85	-1.1234	-1.4206	-5.5434	-41.42	-49.424	2.181	12.641	16.852	37.267	31.909
12:33:06	-2.0787	-0.41327	-3.964	-97.727	-45.828	0.28932	-1.7494	-4.1399	-45.144	-47.414	1.8829	10.86	14.196	37.267	30.231
12:33:07	-1.7272	1.6889	-3.0972	-50.962	-39.112	0.20424	-0.47181	-2.5705	-32.552	-42.932	1.6842	9.0778	12.703	30.737	28.314
12:33:08	-1.9331	1.132	-3.7518	-32.346	-36.996	-0.19682	-0.20351	-4.3396	-28.041	-38.553	2.4791	10.503	13.533	32.913	27.715
12:33:09	-2.4477	-0.54199	-4.4064	-133.99	-42.268	-0.7976	-2.5017	-6.1086	-48.503	-45.871	3.0255	12.285	14.694	36.614	27.835
12:33:10	-2.1604	0.97955	-3.7001	-9.3797	-37.477	-0.45547	0.22627	-4.4488	-24.181	-39.485	2.5287	11.216	13.533	33.784	26.277
12:33:11	-2.525	-1.6802	-4.7329	-171.25	-45.643	-1.2494	-3.4294	-6.1653	-33.319	-49.156	3.0255	12.463	16.686	37.92	28.314
12:33:12	-2.1519	-0.07818	-4.0991	-24.265	-47.78	-0.67317	-0.23116	-4.5181	-32.963	-50.839	1.8829	10.325	13.367	35.526	27.356
12:33:13	-2.3235	-1.3321	-4.499	-183.44	-54.568	-1.1413	-3.5971	-5.4153	-34.741	-59.037	1.8333	12.463	17.349	38.791	29.992
12:33:14	-3.1253	-2.6302	-5.2044	-66.636	-56.293	-1.2806	-1.4956	-6.2472	-45.942	-59.722	2.5784	14.779	19.341	43.58	33.946
12:33:15	-3.0866	-2.4997	-5.0131	-206.34	-51.005	-1.0547	-4.2561	-6.5687	-36.741	-53.713	2.8765	13.176	17.183	41.186	35.024
12:33:16	-2.9237	-1.9394	-4.9151	-68.372	-51.87	-1.1725	-1.4212	-7.0247	-43.049	-55.483	3.1745	12.819	18.677	41.621	34.545
12:33:17	-2.765	-2.2479	-4.8009	-178.54	-49.767	-0.77964	-3.6648	-6.7684	-40.118	-51.647	3.0255	13.532	17.847	40.968	34.066
12:33:18	-2.0746	-0.49861	-4.0366	-33.472	-48.537	-0.22138	-0.48667	-4.1525	-34.625	-51.973	2.2307	12.285	14.03	38.574	33.347
12:33:19	-1.7058	-0.34647	-3.7201	-122.98	-47.463	0.06184	-2.2397	-3.7428	-49.338	-50.398	1.6346	11.038	15.856	38.356	31.669
12:33:20	-2.5121	-1.195	-4.577	-77.218	-48.497	-1.1741	-1.4745	-5.6653	-42.605	-51.272	2.5287	12.463	17.681	40.533	34.545
12:33:21	-2.748	-1.3185	-4.6241	-134.59	-47.711	-1.215	-2.6366	-6.1464	-41.672	-50.904	2.7771	12.463	16.188	40.315	33.826
12:33:22	-2.4477	-0.27931	-4.1208	-81.275	-43.084	-0.7976	-1.4067	-5.4678	-40.243	-45.472	2.9261	12.641	16.188	36.397	32.748
12:33:23	-2.4305	0.51853	-4.012	-96.849	-38.631	-0.4293	-1.5876	-5.4489	-40.009	-42	2.5784	10.86	13.035	33.131	30.711
12:33:24	-2.2676	0.84803	-3.7572	-69.375	-39.172	-0.54715	-0.98284	-4.577	-35.877	-41.399	1.9823	9.7905	12.869	32.913	27.236
12:33:25	-1.4138	1.7505	-3.0047	-55.368	-38.112	1.5007	-0.55238	-3.2639	-32.231	-39.904	1.2372	8.0089	12.371	30.301	25.438
12:33:26	-2.1861	0.39541	-3.5396	-87.755	-39.831	-0.60607	-1.4264	-4.5392	-39.005	-42.902	2.8268	11.394	13.367	34.002	27.236
12:33:27	-2.0318	1.0355	-3.6639	-60.011	-38.482	-0.5062	-0.76778	-4.4425	-33.293	-41.125	2.9261	10.147	13.201	33.131	26.517
12:33:28	-2.1647	0.46501	-3.8198	-90.02	-39.957	-0.74846	-1.46	-4.9426	-39.206	-42.23	2.4791	11.038	14.362	34.002	25.918
12:33:29	-2.482	-0.03027	-4.1417	-76.621	-43.288	-0.7305	-1.2722	-5.5897	-39.115	-46.665	2.181	12.107	13.865	36.179	26.876
12:33:30	-2.4905	-0.11072	-3.7673	-99.621	-42.877	-0.5128	-1.7425	-4.224	-43.173	-45.205	2.181	11.75	15.192	35.961	28.075
12:33:31	-1.7486	1.3944	-3.5233	-46.713	-42.944	0.34665	-0.4317	-3.8269	-33.794	-46.065	1.9326	8.187	13.865	33.567	26.637
12:33:32	-2.5549	0.0124	-3.9495	-108.82	-42.806	-0.88929	-1.9036	-5.0833	-44.77	-46.195	2.9758	11.572	14.03	35.961	29.632
12:33:33	-2.375	0.09565	-3.5505	-62.558	-40.453	-1.4425	-0.97661	-5.0141	-35.14	-42.779	2.5287	11.929	14.86	33.784	28.554
12:33:34	-2.1776	0.41674	-3.7164	-104.04	-41.47	-0.82376	-1.7421	-5.1611	-42.918	-44.498	2.1313	10.681	13.367	34.22	27.236
12:33:35	-2.2719	0.32861	-3.6956	-62.636	-40.491	-0.84015	-0.93616	-5.0393	-35.601	-43.942	2.6281	10.503	13.699	34.22	27.835
12:33:36	-2.1604	0.4087	-3.633	-106.31	-41.581	-0.45547	-1.7891	-4.6737	-43.186	-44.209	3.0752	10.503	13.699	34.873	26.757
12:33:37	-1.6628	1.6595	-3.0155	-37.394	-41.154	0.58073	-0.20317	-3.7387	-31.473	-44.057	1.8829	8.7215	11.375	32.913	25.918
12:33:38	-2.5549	-0.23664	-4.07	-113.41	-42.336	-0.88929	-2.0381	-6.405	-45.568	-46.268	2.032	10.325	14.362	34.873	27.835
12:33:39	-2.5807	0.10894	-4.002	-81.354	-43.838	-1.0399	-1.3393	-5.8019	-40.704	-47.532	2.7274	12.107	14.694	36.179	27.835
12:33:40	-2.6879	-0.2982	-3.7989	-108.99	-42.557	-1.1316	-1.9575	-4.8207	-45.758	-46.152	3.1248	11.75	14.694	36.832	29.393
12:33:41	-2.2119	0.88545	-3.1869	-80.903	-39.225	-0.75666	-1.2045	-4.1232	-38.07	-42.18	2.4791	10.325	14.196	34.002	28.794
12:33:42	-1.6416	1.563	-3.0309	-64.518	-36.55	-0.36538	-0.76744	-3.6232	-33.564	-40.173	1.7836	8.8997	10.546	30.519	25.558
12:33:43	-1.2169	2.2164	-2.8296	-55.109	-34.98	0.51204	-0.47147	-4.2977	-30.717	-38.512	1.8829	7.6525	10.711	29.43	23.641
12:33:44	-2.2634	0.9631	-3.535	-80.926	-38.357	-1.0579	-1.191	-5.1296	-38.202	-41.335	2.4294	9.7905	12.371	32.913	24.959
12:33:45	-2.5506	-0.26358	-3.9603	-143.39	-42.323	-0.59628	-2.6359	-5.5582	-35.138	-45.726	2.0816	11.394	14.03	35.961	26.038
12:33:46	-2.4606	-0.24433	-3.8778	-49.125	-41.674	-0.8729	-0.76189	-5.8986	-34.852	-45.69	2.8765	10.86	15.69	35.308	27.236
12:33:47	-2.1776	-0.2181	-3.8769	-152.67	-43.796	-0.82376	-2.8105	-5.0708	-34.727	-47.756	2.5287	12.107	14.03	35.526	27.356
12:33:48	-1.813	0.48146	-3.4771	-19.476	-43.56	-0.02984	-0.04273	-4.1736	-31.045	-48.255	1.7836	10.147	14.03	34.655	27.595
12:33:49	-1.5558	0.42724	-3.0664	-145.85	-44.265	-0.1313	-2.5616	-2.8016	-33.941	-48.146	2.4791	9.0778	14.03	35.744	28.314
12:33:50	-2.6493	-0.30589	-3.7998	-44.91	-45.616	-0.90566	-0.68134	-5.6486	-36.292	-48.997	3.0255	12.463	15.524	39.227	30.112
12:33:51	-2.8165	-1.0831	-3.9975	-178.04	-44.377	-1.0808	-3.4626	-6.3924	-34.001	-47.394	2.33	11.75	17.349	40.315	31.909
12:33:52	-2.4049	0.21633	-3.613	-28.311	-41.276	-1.0824	-0.27127	-5.3797	-30.535	-44.773	2.4791	11.038	14.196	36.179	30.95
12:33:53	-2.3578	-0.27442	-3.7218	-168.53	-40.614	-1.0742	-3.1397	-5.3985	-33.692	-44.195	3.0752	12.285	16.52	37.267	29.632
12:33:54	-1.5514	2.4014	-2.4806	-2.3705	-35.821	0.1617	0.61004	-2.4634	-22.325	-39.198	1.9326	8.3652	10.711	31.39	27.835
12:33:55	-1.4571	2.3528	-2.3201	-83.011	-35.738	0.17808	-0.9953	-2.5538	-37.35	-39.183	1.5352	8.187	11.375	30.737	26.277
12:33:56	-2.1947	1.3622	-3.2703	-55.379	-35.971	-0.38836	-0.6198	-4.6107	-32.297	-39.609	2.9261	10.681	12.869	34.22	25.558
12:33:57	-2.1519	1.9512	-3.0935	-64.169	-32.362	-0.67317	-0.70002	-3.9888	-31.523	-35.897	2.5784	8.8997	11.541	30.737	24.36
12:33:58	-1.916	0.19184	-3.2594	-101.3	-35.117	-0.63223	-1.7355	-4.1358	-39.951	-38.844	2.032	11.038	13.699	33.567	23.521
12:33:59	-1.9246	1.2926	-3.2957	-53.047	-35.378	-0.41452	-0.58626	-4.1421	-31.7	-39.429	2.7771	10.503	12.371	33.784	23.761
12:34:00	-1.9287	1.038	-2.7191	-103.88	-37.583	0.09618	-1.6342	-2.6231	-41.997	-41.509	2.181	9.256	12.537	32.913	22.802
12:34:01	-1.5341	2.1845	-2.8387	1.3824	-41.534	0.53	0.66363	-3.1168	-26.465	-46.283	1.2868	9.4342	11.873	33.349	23.641
12:34:02	-2.2549	-1.1205	-4.1317	-166.74	-44.744	-1.2756	-3.241	-5.9427	-35.028	-49.54	3.1745	11.038	17.183	37.703	27.955
12:34:03	-2.2248	-0.10511	-3.9086	-53.858	-41.782	-0.83196	-0.82897	-5.6675	-36.44	-46.789	2.8268	11.75	14.196	36.832	28.674
12:34:04	-2.4176	1.046	-3.4408	-101.59	-37.208	-0.35401	-1.5872	-4.1673	-41.663	-42.138	2.032	9.256	13.865	33.567	27.715
12:34:05	-1.9588	1.7746	-3.3265	-48.528	-34.824	-0.34741	-0.41131	-3.911	-31.363	-39.95	2.4791	8.8997	10.214	30.083	25.438
12:34:06	-1.2512	2.7977	-2.7136	-0.00408	-33.037	0.57914	0.72448	-2.3856	-21.531	-36.555	1.4855	8.0089	11.541	27.907	22.802
12:34:07	-2.0187	2.1922	-3.1552	-62.152	-33.56	0.37281	-0.61254	-3.5265	-32.77	-37.262	1.6346	7.8307	9.8817	29.866	22.922
12:34:08	-2.5634	0.8886	-3.7156	8.9886	-35.572	-0.67158	0.57548	-4.3333	-21.119	-39.154	2.032	11.394	14.196	31.607	23.162
12:34:09	-2.7137	-1.9988	-4.4573	-173.72	-46.196	-1.2822	-3.5303	-5.1715	-26.696	-49.098	3.4726	12.641	16.852	38.791	24.24
12:34:10	-2.7093	-0.35136	-4.3485	-35.591	-44.637	-0.98915	-0.50673	-5.1526	-33.971	-48.442	2.5784	12.819	17.018	37.92	27.835
12:34:11	-3.0266	-1.6532	-4.8634	-141.95	-51.231	-0.97118	-2.8316	-7.1339	-28.639	-56.914	1.7836	12.641	16.188	41.621	29.872
12:34:12	-2.7532	-0.0677	-4.1408	-66.129	-50.105	1.3239	-1.0506	-4.7619	-42.979	-54.559	1.6346	9.6123	15.192	37.267	29.752
12:34:13	-2.3318	-0.34891	-4.1725	-79.675	-48.356	-0.11992	-1.3732	-5.3586	-43.926	-52.327	2.5287	12.463	15.192	38.574	31.43
12:34:14	-3.4941	-2.1622	-4.6232	-176.26	-48.978	-1.5638	-3.6043	-5.3186	-37.379	-52.204	2.2803	12.998	18.677	40.75	32.149
12:34:15	-2.8809	-1.2699	-4.421	-54.173	-47.341	-1.4573	-1.0312	-5.1652	-38.284	-49.683	2.6778	13.888	16.852	41.404	32.268
12:34:16	-2.898	-1.897	-4.6758	-167	-47.763	-1.0219	-3.3758	-6.0372	-40.642	-52.147	3.1248	12.107	18.179	40.315	32.748
12:34:17	-3.1938	-1.9985	-4.6649	-107.45	-50.358	-1.1464	-2.2071	-5.5623	-49.835	-52.752	2.7274	13.888	16.686	42.057	31.909
12:34:18	-1.8215	-0.23908	-3.7872	-70.288	-46.273	0.18786	-1.1716	-3.518	-41.21	-51.425	1.5352	9.4342	16.188	37.05	31.07
12:34:19	-2.5892	-1.2062	-4.469	-169.31	-48.815	-0.82217	-3.3015	-6.4742	-42.493	-51.25	2.8765	12.285	14.86	39.009	31.43
12:34:20	-3.0696	-1.6448	-5.0194	-72.902	-49.442	-1.4901	-1.4613	-7.634	-43.452	-54.444	2.9758	12.285	19.009	41.186	31.909
12:34:21	-2.6621	-2.6844	-4.9243	-192.8	-52.463	-0.98096	-4.0144	-5.8438	-44.247	-56.126	2.4791	13.71	17.349	42.927	32.508
12:34:22	-3.4554	-2.8446	-5.237	-105.67	-53.797	-1.3379	-2.3084	-7.6718	-42.851	-58.286	3.4726	13.888	21.332	45.975	34.305
12:34:23	-3.2026	-2.1352	-4.936	-146.49	-48.121	-1.7324	-3.0065	-7.1465	-43.261	-52.364	3.1248	13.71	16.686	42.274	35.384
12:34:24	-1.6457	0.22402	-3.6222	-92.814	-40.556	0.14532	-1.5474	-4.1988	-42.502	-45.265	1.5849	9.256	14.528	33.784	30.471
12:34:25	-2.2975	0.88301	-3.4662	-37.36	-39.915	-0.18703	-0.33801	-3.6988	-31.276	-42.454	2.032	10.681	12.205	33.349	29.393
12:34:26	-2.7178	-0.59026	-4.4419	-147.99	-43.702	-0.77145	-2.7839	-5.2871	-39.972	-46.737	3.0255	11.929	16.022	37.05	28.674
12:34:27	-2.3449	-1.1093	-4.6395	-74.93	-47.684	-0.99894	-1.414	-6.0309	-42.271	-50.745	2.3797	12.641	15.856	39.009	29.752
12:34:28	-3.2882	-1.5112	-4.6132	-123.34	-48.245	-1.1627	-2.4419	-5.6716	-39.005	-52.616	2.5287	12.998	16.852	38.356	30.231
12:34:29	-2.5163	-1.2622	-4.9922	-118.94	-49.28	-0.6634	-2.3074	-6.4469	-38.131	-53.028	2.7274	11.75	16.188	39.009	30.591
12:34:30	-1.6756	0.03689	-4.2913	-36.131	-49.195	0.50543	-0.43931	-5.0245	-37.131	-53.938	2.5287	8.8997	14.196	36.397	29.752
12:34:31	-3.2711	-2.2157	-4.8417	-169.51	-50.273	-1.5981	-3.4768	-6.1842	-39.135	-53.663	1.7339	12.285	16.852	41.186	32.029
12:34:32	-2.3276	-0.26567	-4.333	-33.427	-45.377	-0.63063	-0.44622	-5.2682	-34.362	-50.422	2.7274	11.75	14.528	36.832	31.669
12:34:33	-2.8508	-0.23664	-4.4364	-113.47	-42.907	-1.0137	-2.0381	-5.0497	-45.898	-44.439	2.7771	11.75	15.69	37.05	30.112
12:34:34	-3.2283	-2.202	-5.0494	-121.2	-51.001	-1.883	-2.5162	-6.575	-39.131	-55.1	2.3797	12.463	16.852	42.057	29.992
12:34:35	-2.748	-2.0278	-4.9497	-93.817	-53.182	-1.215	-1.9385	-5.3753	-48.362	-55.633	2.4791	13.176	19.009	42.927	31.55
12:34:36	-2.0398	0.323	-4.1771	-109.33	-46.729	1.3189	-1.8496	-4.7681	-47.798	-51.273	2.2307	9.256	12.869	35.09	32.508
12:34:37	-3.0953	-3.0747	-5.7665	-82.683	-56.736	-1.6407	-1.8921	-8.7097	-48.473	-59.49	2.3797	14.601	20.336	45.322	34.186
12:34:38	-3.7515	-3.7795	-5.6152	-195.56	-57.259	-2.266	-4.2502	-7.6192	-45.941	-60.198	2.2803	14.245	18.843	45.975	35.504
12:34:39	-3.3397	-2.8768	-5.3033	-115.02	-56.993	-1.4639	-2.4965	-6.6191	-47.643	-61.463	2.8765	14.066	21	45.104	36.223
12:34:40	-2.9281	-2.7911	-5.5997	-112.74	-56.871	-1.4655	-2.436	-7.7348	-47.464	-60.748	3.0752	13.71	18.345	44.234	36.342
12:34:41	-3.1253	-2.8957	-5.1219	-142.43	-54.913	-1.2806	-3.0473	-6.5876	-47.38	-59.174	1.8333	12.819	19.175	43.798	35.863
12:34:42	-2.4778	-1.4252	-4.4102	-54.894	-52.891	-1.2412	-1.0582	-4.6904	-42.497	-56.277	2.032	11.75	17.183	40.968	36.822
12:34:43	-3.1167	-1.1821	-4.5878	-162.19	-45.752	-1.4983	-3.1604	-6.1401	-46.246	-49.792	3.0255	13.71	17.515	39.444	36.702
12:34:44	-2.1433	1.5339	-3.5233	15.885	-35.035	-0.89087	0.82442	-3.8269	-19.922	-38.367	1.7836	9.256	10.546	33.131	32.628
12:34:45	-2.6495	1.2282	-3.5016	-71.471	-35.341	-1.7094	-0.96244	-2.8772	-35.091	-37.803	1.3365	10.503	11.541	30.301	27.116
12:34:46	-3.1853	1.6434	-3.3248	-41.237	-34.292	-1.3641	-0.29722	-2.2553	-27.861	-37.312	2.1313	10.503	12.869	30.737	24.839
12:34:47	-2.2462	0.87985	-3.4545	-126.53	-36.802	-0.68956	-2.118	-2.3961	-44.013	-38.828	2.2803	11.75	12.537	31.607	24.48
12:34:48	-3.0395	0.54826	-3.8444	-44.02	-38.15	-1.0465	-0.53301	-3.6462	-31.091	-41.068	2.0816	11.572	12.869	34.002	25.438
12:34:49	-3.2969	0.96834	-3.9123	-101.49	-36.902	-1.7487	-1.6007	-4.2492	-41.071	-42.702	2.7274	10.681	12.205	34.002	25.918
12:34:50	-3.2325	1.5605	-3.5288	-20.469	-31.369	-1.3722	0.09903	-4.0643	-23.807	-35.262	2.2307	11.038	12.703	30.954	25.558
12:34:51	-2.5508	1.9621	-3.4354	-38.859	-31.161	-1.4	-0.19626	-3.9299	-27.001	-35.458	1.7339	9.4342	10.048	30.301	24.24
12:34:52	-2.6449	1.9782	-3.0664	-34.746	-35.388	-0.61266	-0.10221	-2.8016	-29.033	-40.897	1.6346	9.4342	12.039	31.39	22.083
12:34:53	-2.7351	0.07432	-4.198	-47.074	-42.013	-1.1398	-0.66093	-4.89	-35.901	-48.14	2.5784	10.681	13.865	36.179	25.798
12:34:54	-3.1211	-1.8729	-5.1799	-160.09	-45.333	-1.7913	-3.2347	-7.5436	-28.935	-51.571	2.2803	14.423	18.013	40.968	30.831
12:34:55	-3.5799	-0.73961	-4.8109	-35.782	-44.328	-1.7979	-0.57415	-6.4154	-35.09	-50.394	2.33	12.107	15.026	38.356	30.95
12:34:56	-3.2884	-1.5168	-4.8834	-169.26	-45.719	-1.9664	-3.3554	-6.428	-32.24	-51.946	3.1248	14.245	17.681	39.227	31.31
12:34:57	-2.9925	-0.56822	-4.5198	-31.049	-42.52	-1.842	-0.45313	-5.5371	-33.502	-49.694	2.5784	11.75	14.362	35.744	31.07
12:34:58	-2.5292	0.79696	-3.5233	-106.24	-36.781	-0.7387	-1.7217	-3.8269	-42.725	-41.524	1.1378	9.9687	13.367	31.607	29.393
12:34:59	-2.2848	2.0747	-3.5596	-6.8894	-33.93	-0.91545	0.46207	-3.8332	-22.663	-38.484	2.3797	9.6123	10.546	29.43	28.194
12:35:00	-2.7309	1.6913	-3.6639	-93.964	-30.971	-1.6505	-1.3383	-4.4425	-36.186	-34.345	2.6778	11.572	12.703	30.083	25.678
12:35:01	-2.9152	2.4066	-3.1706	-22.565	-29.607	-1.3902	0.20032	-3.4109	-23.021	-32.951	2.032	9.7905	10.214	27.689	22.802
12:35:02	-2.4307	1.8333	-3.4091	-75.652	-31.451	-1.233	-0.94862	-3.5706	-33.454	-35.739	2.2803	11.216	11.873	28.124	21.604
12:35:03	-2.9796	1.322	-3.8606	-66.851	-34.577	-1.7667	-0.85491	-4.3585	-34.161	-39.444	2.7274	10.503	11.541	30.954	21.964
12:35:04	-2.349	1.4105	-3.3937	-41.8	-36.287	-0.48822	-0.33767	-3.6862	-31.152	-40.513	1.4359	8.8997	11.707	28.777	22.563
12:35:05	-2.3492	0.90154	-3.7473	-76.103	-35.738	-1.2919	-1.1104	-4.93	-36.087	-39.183	1.9326	10.681	12.371	32.478	25.319
12:35:06	-3.0611	0.32861	-4.2913	-62.648	-37.883	-1.7078	-0.93616	-5.0245	-35.667	-42.795	2.7274	11.75	13.865	32.696	24.959
12:35:07	-3.2069	0.4944	-3.8815	-104.03	-36.407	-2.0254	-1.7286	-4.4803	-42.852	-42.153	2.2803	12.107	13.035	32.26	25.558
12:35:08	-2.3964	1.4507	-3.5696	-29.889	-33.435	-1.3001	-0.10255	-3.4802	-26.721	-37.472	2.0816	10.681	12.039	30.737	25.079
12:35:09	-2.7093	0.99248	-3.8027	-94.505	-34.646	-0.98915	-1.4596	-3.4025	-39.346	-39.379	2.6778	11.216	12.205	30.083	24.12
12:35:10	-2.4733	0.68223	-3.6367	-28.537	-38.072	-0.1445	-0.19037	-3.2554	-31.852	-44.371	1.6842	7.8307	12.371	29.866	23.282
12:35:11	-3.2026	-0.85259	-4.5044	-134.46	-40.346	-1.7324	-2.5557	-5.6527	-35.193	-46.385	2.1313	12.285	13.533	34.655	26.038
12:35:12	-3.1897	-0.59515	-4.6704	-60.923	-41.006	-1.6571	-1.0509	-5.7997	-38.625	-47.426	2.9758	11.75	14.362	33.784	27.356
12:35:13	-3.5799	-1.2891	-5.0756	-148.53	-43.21	-1.7979	-2.9052	-6.9343	-36.254	-49.968	2.5287	13.354	14.694	35.308	27.955
12:35:14	-2.941	-0.62733	-4.6341	-70.254	-42.177	-1.5408	-1.239	-5.7935	-41.012	-48.632	2.032	11.572	14.528	33.349	27.595
12:35:15	-2.6193	0.03654	-4.0057	-101.76	-37.319	-1.2658	-1.7625	-4.3837	-42.651	-41.849	2.9261	11.929	12.205	31.607	26.996
12:35:16	-1.9158	3.0467	-2.6711	4.7288	-31.853	0.17148	0.85898	-1.3141	-19.943	-35.269	1.4855	8.7215	9.7158	25.077	22.922
12:35:17	-2.7351	2.9929	-2.594	-54.467	-26.576	-1.1398	-0.33663	-1.8919	-26.964	-29.802	2.0816	9.4342	8.5541	23.988	21.724
12:35:18	-2.7866	1.1908	-3.6684	-59.707	-31.74	-1.4409	-0.74081	-3.8521	-31.515	-36.021	2.8765	11.75	12.205	27.907	20.046
12:35:19	-2.9709	1.1614	-3.6684	-45.947	-30.081	-1.1807	-0.47216	-3.8521	-29.317	-36.658	2.6778	10.681	11.375	29.213	20.885
12:35:20	-3.0523	1.3139	-3.6739	-68.846	-30.706	-1.1218	-0.90193	-4.0895	-32.783	-35.147	1.6842	11.038	12.039	27.689	21.484
12:35:21	-2.8637	2.2328	-3.5542	16.291	-30.1	-1.089	0.94577	-3.5958	-17.552	-34.425	2.6778	10.325	9.5498	25.947	19.927
12:35:22	-1.8516	2.1118	-3.1126	-85.152	-31.749	-0.25574	-1.0828	-2.4549	-36.828	-37.951	2.0816	8.187	10.214	23.117	19.088
12:35:23	-2.2848	2.5997	-3.4971	32.236	-30.855	-0.91545	1.3289	-3.4676	-15.613	-36.484	1.5352	10.325	9.5498	26.383	21.364
12:35:24	-3.0181	0.46466	-4.3068	-156.59	-36.194	-1.1889	-2.7832	-4.9089	-25.694	-39.031	2.8765	11.038	13.367	29.43	22.083
12:35:25	-2.9067	2.4283	-3.5233	27.706	-32.941	-1.6079	1.2079	-3.8269	-16.017	-36.461	2.2803	11.216	9.3839	26.165	22.203
12:35:26	-2.808	2.1653	-3.5442	-91.553	-31.222	-1.2985	-1.2104	-3.9488	-35.129	-33.463	1.6842	9.9687	10.214	25.512	21.724
12:35:27	-2.5892	1.8417	-3.6276	-6.8105	-34.212	-0.82217	0.42162	-4.4362	-22.202	-36.373	2.6281	10.681	11.209	26.6	19.208
12:35:28	-2.1132	3.0709	-2.9938	11.772	-32.449	-0.44727	1	-2.789	-17.889	-34.524	1.9326	8.5434	8.0563	24.206	19.327
12:35:29	-2.8851	2.0904	-3.5496	-68.79	-33.04	-0.94661	-0.7671	-4.1862	-32.453	-35.629	1.9326	10.325	10.38	25.947	22.083
12:35:30	-3.0353	2.2972	-3.7935	34.546	-34.307	-1.5572	1.322	-4.5833	-15.148	-36.929	2.2307	10.503	10.048	26.165	20.526
12:35:31	-3.2196	0.59059	-4.2659	-142.89	-39.089	-1.2969	-2.4876	-5.493	-48.388	-41.385	3.2739	12.107	13.035	29.43	22.563
12:35:32	-2.9539	0.70916	-4.2451	1.664	-40.631	-1.6161	0.40744	-5.3712	-24.819	-43.35	2.5784	11.038	11.375	30.301	23.881
12:35:33	-2.3361	1.5658	-3.7572	-41.676	-38.081	-0.41292	-0.3107	-4.577	-30.428	-41.133	1.6842	10.147	11.375	28.56	23.521
12:35:34	-1.9588	2.4734	-3.362	-48.483	-36.758	-0.34741	-0.28995	-3.0894	-31.099	-39.977	1.8333	8.7215	9.218	25.512	23.282
12:35:35	-2.7693	0.85922	-4.3176	22.117	-43.028	-1.0726	0.84413	-5.3838	-22.609	-45.617	2.8268	11.75	11.873	31.172	24.839
12:35:36	-3.2198	-0.13241	-4.6187	-150.42	-43.81	-2.1007	-2.75	-5.909	-27.239	-47.835	2.4791	12.285	14.362	32.696	26.277
12:35:37	-3.1639	0.22962	-4.2042	-46.972	-42.956	-1.5065	-0.63396	-5.9553	-35.309	-46.607	2.1313	12.998	12.537	32.696	27.955
12:35:38	-3.2111	0.02361	-4.5098	-17.121	-45.012	-1.5147	-0.07661	-5.8901	-30.317	-47.813	2.6281	11.75	14.528	33.349	27.715
12:35:39	-2.6065	-0.03866	-4.2242	-145.82	-43.191	-1.1905	-2.6425	-5.2493	-28.868	-46.571	2.5287	11.394	12.371	32.043	28.314
12:35:40	-2.0831	1.4563	-3.8878	15.153	-43.205	-0.00368	0.81093	-5.5456	-24.201	-46.65	1.9326	9.7905	10.546	28.777	27.595
12:35:41	-3.0482	-0.19886	-4.5878	-58.669	-45.548	-1.6325	-0.9365	-6.1401	-38.49	-48.6	2.3797	11.572	15.026	33.784	28.913
12:35:42	-3.1598	-0.41363	-4.868	-164.36	-44.581	-2.0172	-3.0726	-6.5435	-30.469	-48.586	2.4294	12.285	14.196	35.308	30.112
12:35:43	-3.0353	0.20304	-4.4944	-10.382	-45.063	-1.5572	0.09143	-6.0057	-30.041	-49.056	2.7771	12.819	13.367	35.526	28.314
12:35:44	-3.1082	-0.48533	-4.6032	-51.863	-46.511	-1.716	-0.84936	-6.0246	-37.819	-50.001	3.0752	12.819	15.358	35.744	30.591
12:35:45	-2.9967	-0.18068	-4.198	-164.42	-44.263	-1.3313	-3.0321	-4.89	-34.204	-48.608	2.4294	11.394	13.533	33.567	29.752
12:35:46	-1.873	2.3133	-3.1443	38.367	-39.774	-0.11333	1.416	-3.0517	-18.893	-43.509	1.3862	8.5434	9.8817	29.213	28.075
12:35:47	-2.7093	1.2608	-3.7364	3.9291	-40.119	-0.98915	0.54885	-4.4551	-24.617	-43.646	1.9823	11.394	12.537	30.519	26.996
12:35:48	-2.7565	0.54232	-4.0583	-156.93	-38.409	-0.99734	-2.7697	-5.1022	-28.883	-42.578	2.5784	11.216	11.873	32.26	24.72
12:35:49	-2.615	1.1079	-3.7835	-39.49	-37.157	-0.97277	-0.34458	-4.9363	-30.687	-40.432	2.6778	10.681	11.707	30.083	25.438
12:35:50	-2.6964	1.0841	-3.8869	20.179	-38.438	-0.91385	0.83756	-4.7178	-20.901	-41.812	2.6778	11.216	13.367	31.607	23.881
12:35:51	-2.6493	1.1023	-3.6222	-85.501	-37.156	-0.90566	-1.2581	-4.1988	-38.869	-40.895	2.33	11.038	11.873	31.825	25.199
12:35:52	-1.7014	2.251	-2.7916	-89.885	-36.07	0.35484	-1.1498	-2.6357	-38.416	-38.778	1.3862	8.3652	8.5541	27.689	22.683
12:35:53	-2.4348	2.656	-3.2432	48.125	-34.538	-0.72231	1.658	-3.4235	-14.004	-38.281	1.9823	9.256	11.541	26.818	24.001
12:35:54	-2.825	1.6864	-3.7373	-7.2273	-36.398	-0.86312	0.39465	-5.283	-24.638	-40.223	2.2307	10.325	11.375	29.43	23.881
12:35:55	-2.8851	1.1181	-3.7835	-147.46	-36.523	-0.94661	-2.4872	-4.9363	-48.989	-40.014	2.7274	11.572	10.214	29.648	23.521
12:35:56	-2.8637	1.4399	-3.7164	-55.424	-36.19	-1.089	-0.60631	-5.1611	-32.56	-40.419	2.8268	10.86	11.707	29.866	23.641
12:35:57	-2.1733	2.7123	-3.0309	64.296	-35.173	-0.53077	1.9872	-3.6232	-10.749	-38.699	2.181	8.8997	10.711	27.689	21.484
12:35:58	-1.8774	3.3976	-2.5423	16.032	-33.296	-0.40633	1.148	-2.0012	-19.066	-38.065	1.0881	8.3652	9.3839	25.73	21.844
12:35:59	-2.5678	1.0163	-3.5913	-154.4	-37.971	-0.96459	-2.6418	-4.4299	-27.841	-40.959	2.2307	10.86	11.375	29.866	23.761
12:36:00	-2.4864	1.4507	-3.6901	-30.283	-36.672	-1.0235	-0.10255	-4.8018	-29.025	-40.888	2.3797	10.503	11.707	30.519	24.36
12:36:01	-2.4348	2.0429	-3.5242	50.391	-34.855	-0.72231	1.5972	-4.6548	-13.802	-38.721	2.6281	10.325	12.039	29.213	23.761
12:36:02	-2.8851	1.5283	-3.4625	-30.069	-36.318	-0.94661	-0.08907	-5.117	-27.774	-39.284	2.6778	11.216	11.873	30.083	24.36
12:36:03	-2.439	1.7553	-2.8596	-142.85	-36.315	-0.21161	-2.2853	-3.2387	-48.124	-40.209	2.181	8.8997	9.5498	27.907	21.964
12:36:04	-2.2418	2.1013	-3.1869	-44.144	-37.155	-0.39655	-0.26334	-4.1232	-31.815	-41.358	2.181	8.7215	11.541	28.995	24.12
12:36:05	-2.4992	1.3332	-3.5496	24.686	-38.972	-1.0988	0.97206	-4.1862	-20.629	-43.524	2.5287	10.681	13.035	32.043	24.48
12:36:06	-2.5851	1.0733	-3.7581	-5.2213	-39.319	-1.3329	0.3338	-5.4048	-25.95	-43.199	2.2803	11.394	12.703	33.131	26.397
12:36:07	-2.9108	0.4031	-3.789	-152.38	-38.838	-1.0972	-2.7026	-5.1737	-31.63	-42.267	2.4791	11.394	12.205	33.131	26.157
12:36:08	-2.975	0.65495	-3.6276	-124.75	-38.655	-0.66999	-2.1114	-4.4362	-46.643	-43.546	2.5287	11.038	12.703	33.349	26.517
12:36:09	-2.0444	2.0883	-2.885	40.711	-39.303	0.22221	1.4226	-2.7701	-18.23	-44.045	2.032	8.5434	12.039	30.737	24.959
12:36:10	-1.7573	2.3535	-3.0355	49.962	-39.468	-0.23936	1.6511	-3.0328	-16.304	-44.073	2.2803	8.7215	11.375	30.301	24.48
12:36:11	-2.5335	0.4115	-3.9032	-83.709	-41.191	-1.0317	-1.3324	-5.43	-41.432	-45.684	2.8765	11.394	14.03	34.655	27.116
12:36:12	-2.958	0.14601	-4.09	-159.44	-40.82	-1.1054	-2.8841	-5.699	-30.652	-44.925	2.8268	11.75	13.699	34.22	26.517
12:36:13	-3.2196	0.80256	-3.7318	-60.597	-39.411	-1.2969	-0.80823	-5.0456	-36.716	-44.68	2.6778	12.107	14.528	33.131	27.715
12:36:14	-2.5634	1.4591	-3.5496	38.581	-38.862	-0.67158	1.2677	-4.1862	-17.642	-43.351	2.4294	10.86	12.869	32.26	26.038
12:36:15	-1.4999	2.7526	-2.7553	75.239	-37.924	0.4629	2.2223	-2.6294	-11.979	-43.034	1.5352	8.5434	9.8817	30.083	24.48
12:36:16	-2.0276	1.5199	-3.1298	-99.339	-36.671	-1.0169	-1.4593	-3.9951	-41.527	-41.351	1.9326	9.6123	10.877	30.737	24.959
12:36:17	-2.8379	1.0271	-3.623	-129.01	-35.253	-0.93842	-2.138	-5.0267	-45.466	-39.639	2.2803	11.038	13.865	32.478	25.199
12:36:18	-2.6578	2.0373	-3.2903	4.3458	-34.948	-0.68796	0.68369	-3.9047	-22.181	-40.203	2.2307	11.038	12.205	30.519	24.001
12:36:19	-2.5163	1.933	-3.3837	40.801	-37.47	-0.6634	1.3956	-4.0392	-17.703	-42.261	2.4294	10.681	11.707	31.172	22.922
12:36:20	-2.4562	0.93407	-3.8144	-0.77002	-40.058	-0.5799	0.40087	-4.7052	-26.008	-45.641	2.7274	10.681	12.371	32.913	24.001
12:36:21	-1.8473	1.6966	-3.1706	-115.57	-35.729	0.03727	-1.748	-3.4109	-45.112	-42.421	2.2307	8.7215	11.873	29.43	23.162
12:36:22	-2.4047	1.2307	-3.3574	-115.48	-37.871	-0.27871	-1.8289	-3.6799	-44.585	-42.253	2.2307	9.256	12.869	30.519	24.6
12:36:23	-2.9279	1.9302	-3.3791	18.06	-34.535	-0.6618	0.93886	-4.6296	-20.247	-39.669	2.8765	11.216	11.541	31.172	24.959
12:36:24	-2.7307	2.79	-3.0618	64.499	-30.87	-0.84674	2.0007	-3.392	-9.5637	-36.101	2.1313	10.325	10.048	26.818	22.443
12:36:25	-2.3877	1.7239	-3.4045	-18.463	-32.968	-0.71412	0.17302	-4.161	-25.12	-36.62	2.33	10.325	12.205	29.866	23.042
12:36:26	-2.4735	0.41115	-3.7572	-149.95	-36.614	-0.9482	-2.6556	-4.577	-24.879	-41.958	2.3797	10.681	13.865	33.784	22.563
12:36:27	-1.7099	2.2003	-2.8179	-60	-33.35	0.57254	-0.56552	-2.995	-33.227	-38.383	1.6346	8.0089	10.048	28.995	21.964
12:36:28	-2.6276	2.2436	-3.3265	41.105	-35.597	-0.24436	1.4495	-3.911	-15.926	-40.239	2.032	10.325	10.711	28.124	22.203
12:36:29	-2.8336	2.0348	-3.6639	47.844	-35.084	-0.64542	1.5502	-4.4425	-15.65	-40.998	2.2307	10.503	12.703	28.777	23.282
12:36:30	-2.825	0.6525	-3.8561	-81.106	-37.082	-0.86312	-1.2449	-4.9489	-39.255	-42.81	2.6281	11.394	13.201	31.825	24.6
12:36:31	-2.499	0.0925	-4.2768	-152.4	-39.839	-0.2951	-2.7566	-5.9679	-26.014	-44.832	2.9261	11.394	13.201	34.437	24.36
12:36:32	-2.6449	0.35274	-4.2559	-56.292	-41.391	-0.61266	-0.79509	-5.846	-37.63	-48.264	2.8268	10.325	13.035	33.784	24.839
12:36:33	-2.2071	1.0495	-3.4291	53.884	-43.514	1.1438	1.5159	-2.8646	-19.456	-49.867	2.6778	9.0778	12.869	32.696	24.72
12:36:34	-3.4039	-0.65112	-4.6141	-10.788	-46.877	-1.0367	-0.05689	-6.4994	-32.411	-52.61	2.6281	13.532	16.852	38.356	28.434
12:36:35	-3.434	-1.7176	-4.9722	-160.36	-47.468	-1.4803	-3.2078	-7.1528	-28.878	-53.716	2.8765	13.532	16.52	38.574	30.711
12:36:36	-2.9624	-1.1447	-4.8217	-174.06	-46.13	-1.3984	-3.382	-6.8902	-29.593	-52.943	2.6778	13.354	16.188	39.009	31.31
12:36:37	-3.1772	-1.0904	-4.9977	-47.727	-47.661	-3.1892	-0.86319	-6.6843	-39.72	-53.903	2.5287	12.641	16.686	38.574	31.55
12:36:38	-2.9964	-0.32967	-4.3693	14.443	-47.012	-0.52758	0.50081	-5.2745	-28.349	-53.868	2.33	11.929	15.69	37.703	30.95
12:36:39	-2.7047	0.91274	-3.5596	14.759	-43.761	0.10755	0.71655	-3.8332	-26.505	-50.372	2.032	10.86	12.869	34.655	30.112
12:36:40	-3.1423	-0.72423	-4.5724	-164.56	-44.093	-0.84516	-3.1265	-6.2557	-31.042	-50.43	2.7274	12.463	14.528	37.92	31.789
12:36:41	-2.9322	-0.19117	-4.4064	-122.85	-42.166	-0.9548	-2.2127	-6.1086	-48.548	-47.627	3.0752	11.929	15.856	34.655	30.591
12:36:42	-2.765	0.60214	-4.4953	15.164	-39.822	-0.77964	0.66261	-6.8335	-24.135	-46.14	2.7274	11.216	14.362	34.002	29.033
12:36:43	-2.8207	1.2877	-4.2151	33.724	-39.162	-0.57012	1.1467	-6.4301	-19.954	-45.1	2.1313	11.038	12.703	33.567	26.637
12:36:44	-2.8076	0.32336	-3.9812	-42.465	-41.973	0.30888	-0.52644	-5.6801	-35.037	-47.439	1.8829	11.75	12.869	33.784	26.876
12:36:45	-3.0694	-0.03062	-4.032	-143.73	-43.419	-0.68637	-2.5954	-4.743	-31.919	-49.31	1.7836	11.216	15.856	34.873	27.835
12:36:46	-3.3312	-0.78019	-4.4844	-114.08	-44.794	-1.6816	-2.1325	-6.3587	-49.453	-51.709	2.5784	12.285	15.69	36.397	28.554
12:36:47	-2.6493	0.76548	-4.1417	17.452	-39.821	-0.90566	0.7366	-5.5897	-23.802	-46.603	2.5784	11.038	12.205	32.696	29.153
12:36:48	-2.6106	1.435	-3.9757	31.639	-37.524	-0.67977	1.1266	-5.4426	-19.103	-42.579	2.9261	11.394	12.039	32.26	27.476
12:36:49	-2.9237	2.1761	-3.5188	-66.468	-30.17	-1.1725	-0.70659	-4.4173	-31.923	-34.36	2.9261	11.75	11.707	28.995	24.959
12:36:50	-1.9112	3.1212	-2.6411	-84.758	-29.286	1.2682	-0.90748	-2.373	-34.524	-34.361	1.9326	7.2962	8.8861	25.512	20.885
12:36:51	-2.5846	2.6022	-3.3003	-11.329	-31.684	0.27454	0.46241	-3.5517	-22.54	-36.165	2.0816	9.7905	9.8817	27.907	20.765
12:36:52	-2.8768	2.5945	-2.8496	53.14	-30.528	-1.968	1.7386	-3.5917	-10.77	-34.576	2.2803	10.147	10.546	27.907	20.885
12:36:53	-2.4348	2.648	-3.3374	46.142	-30.761	-0.72231	1.611	-4.3858	-12.56	-35.465	2.33	11.216	12.039	28.342	19.687
12:36:54	-2.6921	1.0299	-3.8252	-105.88	-32.648	-0.62085	-1.6813	-5.18	-40.618	-37.567	2.4791	11.038	11.873	30.301	21.484
12:36:55	-2.9707	1.1716	-3.4988	-154.06	-32.8	-0.37699	-2.6148	-5.1233	-48.474	-37.516	2.7274	10.147	10.546	28.56	21.604
12:36:56	-2.2545	3.1968	-2.5377	25.385	-32.316	0.33187	1.2957	-2.5916	-16.547	-37.509	1.7339	7.2962	9.218	26.165	19.208
12:36:57	-2.5676	3.0229	-2.953	64.465	-32.028	-0.16087	2.0411	-3.3732	-9.7612	-36.765	2.2803	9.7905	10.877	27.689	20.286
12:36:58	-2.6235	2.1552	-3.545	16.02	-33.116	-0.75507	0.93229	-4.7766	-19.132	-37.957	2.6778	11.75	11.375	30.519	21.844
12:36:59	-2.4905	1.4556	-3.9395	-117.34	-34.164	-0.5128	-1.8355	-5.4363	-42.417	-38.91	2.6281	11.216	11.873	30.519	21.964
12:37:00	-2.5591	1.3458	-3.7635	-126.54	-34.207	-0.37858	-2.0371	-5.6423	-44.079	-38.223	2.4791	10.503	12.869	31.39	23.401
12:37:01	-2.9665	2.1684	-3.2848	-2.1453	-31.424	-0.88769	0.56959	-3.6673	-21.009	-35.58	2.3797	10.503	11.541	30.083	22.203
12:37:02	-2.0743	4.145	-2.2567	96.886	-29.673	0.58232	2.8747	-1.3604	-2.7899	-34.273	1.4359	7.8307	8.2223	25.73	19.447
12:37:03	-2.5763	3.0362	-2.797	46.277	-29.342	-0.74688	1.6784	-2.8731	-11.77	-33.753	2.1313	10.325	10.214	28.342	20.646
12:37:04	-2.6493	1.4021	-3.4671	-110.11	-31.411	-0.90566	-1.7079	-4.5266	-39.31	-35.038	2.7274	10.503	12.205	30.301	21.964
12:37:05	-2.4091	1.975	-3.3428	-123.87	-29.867	-0.57171	-1.8822	-4.6233	-41.507	-33.999	2.8268	9.9687	10.38	27.907	20.885
12:37:06	-2.5977	3.0709	-2.9838	12.2	-26.052	-0.60447	1	-3.142	-15.387	-29.557	2.7274	8.8997	9.3839	26.383	18.968
12:37:07	-2.8336	4.137	-2.3872	95.387	-22.196	-0.64542	2.8277	-2.329	1.4853	-25.339	2.4791	9.256	8.7201	23.77	19.208
12:37:08	-1.7828	5.6848	-1.281	116.61	-18.739	0.41376	3.5071	0.22799	8.1723	-21.114	1.3862	5.8709	6.2309	18.981	14.654
12:37:09	-1.8344	5.1699	-1.5575	-30.476	-19.016	0.11256	0.49765	-1.5937	-17.113	-20.853	1.8333	7.118	5.5671	19.416	13.696
12:37:10	-1.9588	4.2325	-2.3201	-76.633	-18.931	-0.34741	-0.57764	-2.5538	-26.15	-21.764	1.9326	7.8307	6.7287	21.593	13.576
12:37:11	-2.3663	4.0803	-2.2892	12.819	-20.694	-0.85652	1.1753	-2.7849	-11.766	-23.613	2.1313	8.3652	8.5541	23.553	13.816
12:37:12	-2.6748	4.0191	-2.6836	83.881	-23.119	-0.25255	2.5791	-3.4446	-0.57653	-26.039	2.5784	9.256	8.5541	23.553	13.696
12:37:13	-2.7263	4.0191	-2.5214	83.757	-24.772	-0.55374	2.5791	-1.8793	-1.3007	-27.715	2.5784	9.0778	7.8904	24.641	14.774
12:37:14	-1.4483	4.1017	-1.4578	-3.6331	-25.42	0.76409	0.85967	-0.39393	-16.668	-28.213	1.8829	6.4054	6.8947	22.029	14.415
12:37:15	-2.0702	2.6284	-2.7145	-114.51	-29.523	0.07161	-1.5862	-3.2135	-38.923	-33.399	2.4791	8.7215	10.877	26.165	17.171
12:37:16	-2.4905	2.3745	-3.1035	-31.828	-30.569	-0.5128	0.01223	-3.6358	-25.013	-34.815	2.4294	10.147	10.38	29.213	18.728
12:37:17	-2.9194	2.8516	-3.2232	60.014	-31.604	-0.8795	1.9201	-4.1295	-9.7037	-35.226	2.3797	10.147	10.214	29.43	20.406
12:37:18	-3.0608	2.6963	-3.3011	59.958	-31.838	-0.90407	1.8931	-4.3795	-10.033	-35.652	2.2803	10.147	10.877	29.866	21.005
12:37:19	-2.2975	3.2688	-2.7082	-20.074	-28.269	-0.18703	0.39567	-2.1482	-21.503	-32.179	1.9823	8.8997	10.38	26.6	20.046
12:37:20	-2.6921	4.6931	-1.6129	-56.282	-23.959	0.67082	-0.08701	-0.06613	-24.532	-27.188	1.5849	5.8709	7.7244	23.117	17.53
12:37:21	-2.1431	3.9464	-2.4334	-3.5317	-24.649	-0.08717	0.8327	-1.9823	-16.075	-27.462	2.5784	8.3652	8.0563	24.859	18.728
12:37:22	-2.2933	4.4396	-2.3872	93.122	-24.319	-0.69775	2.8346	-2.329	1.2836	-26.942	2.4294	8.0089	7.7244	24.206	17.41
12:37:23	-2.4689	4.3619	-2.5531	93.054	-24.346	0.1485	2.8211	-2.476	0.88857	-27.101	2.3797	8.7215	9.052	24.423	16.931
12:37:24	-2.7735	3.4028	-2.8696	-3.7457	-26.481	-0.56193	0.73832	-2.8857	-17.326	-29.246	2.1313	9.9687	9.5498	26.818	17.53
12:37:25	-2.1088	3.5952	-2.4543	-81.772	-26.136	-0.15428	-0.77956	-2.1041	-30.108	-29.109	2.032	8.3652	7.8904	25.512	16.931
12:37:26	-2.4111	4.6907	-2.3472	-12.783	-24.647	0.97201	0.77945	-3.7409	-18.001	-27.924	1.4359	5.5145	6.3968	22.247	15.373
12:37:27	-2.156	4.2521	-2.3718	83.836	-25.007	-0.16247	2.6196	-2.4445	-0.83988	-27.678	2.0816	8.187	9.052	24.641	17.53
12:37:28	-2.5678	4.1531	-2.4189	99.725	-26.523	-0.96459	2.9217	-2.9257	0.76941	-29.022	2.2803	9.0778	8.8861	25.73	17.65
12:37:29	-2.7864	3.6092	-2.8958	32.878	-28.215	-0.63723	1.5042	-3.245	-11.861	-31.861	2.4294	9.7905	8.7201	25.077	17.051
12:37:30	-2.915	2.0929	-3.5559	-112.34	-30.572	-0.5865	-1.6336	-5.2515	-39.314	-33.89	2.7274	9.9687	10.877	28.777	18.848
12:37:31	-2.2503	2.9981	-2.953	-75.382	-29.125	-0.17885	-0.74636	-3.3732	-31.873	-32.481	2.33	8.5434	9.8817	26.818	19.088
12:37:32	-1.3455	5.1436	-1.8105	72.218	-25.446	0.56276	2.5463	-0.80991	-3.56	-28.834	1.4855	5.8709	6.5628	22.029	17.171
12:37:33	-2.3877	4.0915	-2.6102	104.3	-27.033	-0.71412	3.0023	-2.6042	1.4361	-29.65	2.4791	9.0778	8.3882	25.73	18.489
12:37:34	-2.851	3.7298	-2.3563	67.665	-25.67	-1.8174	2.2095	-2.5601	-4.0951	-27.794	2.5784	9.4342	9.7158	26.383	18.848
12:37:35	-2.8936	3.1775	-2.8179	-68.069	-25.764	-0.72891	-0.57832	-2.995	-28.24	-28.813	2.4294	9.256	9.8817	26.6	18.009
12:37:36	-2.8464	2.4892	-2.9892	-109.66	-28.259	-0.72072	-1.5191	-3.3795	-36.676	-30.711	2.33	9.0778	9.8817	27.036	18.009
12:37:37	-1.7828	4.5571	-2.3772	37.701	-25.378	0.41376	1.76	-2.6819	-9.7454	-28.437	1.7339	6.9399	7.0606	24.859	17.77
12:37:38	-2.5935	5.6848	-1.8214	116.4	-21.193	0.35325	3.5071	-1.2848	6.9873	-23.237	1.5849	7.118	5.5671	20.94	15.733
12:37:39	-2.1261	4.7288	-2.1687	109.5	-21.717	-0.52257	3.2042	-1.4633	5.7238	-23.482	2.181	9.0778	8.7201	22.9	16.092
12:37:40	-2.5722	3.9516	-2.2575	-23.996	-22.983	-1.2576	0.42298	-2.1882	-18.351	-25.244	2.2307	8.7215	7.7244	23.77	15.373
12:37:41	-2.8593	3.2979	-2.7036	-99.892	-22.266	-0.79602	-1.1962	-2.7386	-31.722	-24.811	2.2803	8.3652	8.2223	24.859	16.811
12:37:42	-2.6364	4.4549	-2.388	-35.153	-19.885	-0.83036	0.28225	-3.1568	-18.372	-21.698	2.2803	7.8307	8.3882	22.464	15.134
12:37:43	-1.354	6.2444	-1.5929	121.39	-17.719	0.78047	3.6955	-0.77212	10.09	-20.319	1.5352	5.3364	5.733	18.763	12.258
12:37:44	-2.3555	7.2112	-1.0534	153.87	-15.312	0.2436	4.5022	-0.08721	17.39	-16.585	1.5352	5.3364	3.0779	17.022	11.898
12:37:45	-2.1302	5.4731	-2.1378	100.73	-17.294	-0.01187	3.151	-1.6944	6.6289	-19.243	2.2307	8.187	6.0649	20.287	12.498
12:37:46	-2.7263	4.1415	-2.3609	-58.231	-20.505	-0.55374	-0.22842	-1.9697	-22.89	-22.037	2.4294	8.3652	8.5541	22.464	12.018
12:37:47	-3.0052	3.662	-2.6882	-106.78	-22.763	-1.1136	-1.2698	-2.8542	-32.854	-24.898	2.4791	8.8997	8.5541	23.988	13.097
12:37:48	-2.6835	3.6277	-2.6465	-5.8982	-25.159	-0.83855	0.73175	-2.6105	-16.869	-27.628	2.4294	8.5434	8.0563	23.988	14.894
12:37:49	-1.8944	4.4717	-2.2412	102.13	-24.622	0.02908	3.0227	-1.4759	1.7611	-27.303	1.9326	8.0089	7.3925	23.335	14.415
12:37:50	-1.3068	5.2108	-1.5775	113.71	-24.979	0.78866	3.3792	-0.88769	4.2838	-27.982	1.6346	6.5835	7.5585	22.682	14.415
12:37:51	-2.6191	3.2262	-2.8958	12.279	-27.503	-0.46206	1.027	-3.245	-14.927	-29.577	2.4791	9.9687	10.214	26.383	17.65
12:37:52	-3.048	2.9016	-3.0209	-102.63	-26.097	-0.82878	-1.3106	-3.9762	-34.689	-28.408	2.4294	9.4342	9.3839	27.036	18.249
12:37:53	-2.7993	3.8897	-2.6002	-86.155	-22.569	-0.71253	-0.81966	-2.9572	-29.656	-25.172	2.2803	8.7215	8.0563	24.423	16.931
12:37:54	-2.1947	4.541	-2.3455	33.655	-21.028	-0.38836	1.666	-2.0852	-7.3178	-22.745	2.33	7.6525	7.8904	22.029	15.972
12:37:55	-2.6653	6.4186	-1.0634	148.87	-17.801	0.57914	4.2733	0.26578	14.222	-20.796	1.4359	5.5145	5.733	19.199	12.977
12:37:56	-1.3713	6.7908	-1.2293	144.63	-14.854	0.41217	4.2467	0.11872	15.53	-17.199	1.6346	5.8709	3.7416	17.022	12.258
12:37:57	-2.4047	5.6389	-1.8531	59.551	-14.775	-0.27871	2.3585	-1.8815	0.62847	-15.797	1.9326	7.8307	5.0692	19.199	12.378
12:37:58	-2.5506	5.0894	-2.0399	-53.093	-15.354	-0.59628	0.02743	-2.1504	-18.932	-16.361	2.2307	7.2962	6.3968	19.852	11.179
12:37:59	-2.615	4.5913	-2.2004	-62.491	-18.219	-0.97277	-0.24157	-2.06	-21.714	-19.481	2.2803	7.4744	7.3925	21.158	11.179
12:38:00	-2.1475	4.9453	-1.9873	38.49	-19.514	-0.38017	1.8274	-1.4318	-5.1369	-20.94	2.1313	7.8307	6.7287	21.593	11.659
12:38:01	-1.4955	5.8803	-1.8322	128.15	-19.113	0.7559	3.7692	-1.7596	10.432	-20.947	1.8829	6.4054	5.0692	21.376	12.258
12:38:02	-1.5341	6.4025	-1.3644	144.35	-18.565	0.53	4.1792	-0.25947	13.884	-19.155	1.5352	5.1582	4.9033	19.416	11.898
12:38:03	-2.6405	5.4623	-2.1278	75.429	-17.625	-0.31966	2.6472	-2.0474	2.1719	-19.3	2.3797	7.8307	7.0606	22.247	13.456
12:38:04	-2.349	5.1751	-1.7688	-50.816	-15.794	-0.48822	0.08794	-0.56619	-18.664	-17.054	2.2803	7.4744	5.5671	20.94	13.216
12:38:05	-2.0232	5.392	-1.8477	-55.347	-15.836	-0.7239	0.03434	-1.6441	-19.068	-16.83	2.2307	7.118	5.4011	20.07	11.898
12:38:06	-1.946	5.7995	-1.8477	38.974	-15.631	-0.27212	1.9758	-1.6441	-2.3059	-16.1	2.2307	6.5835	5.733	20.07	10.7
12:38:07	-1.9671	6.5417	-1.4061	140.02	-15.988	0.674	4.1122	-0.5032	14.666	-16.779	1.9823	5.6927	5.2352	18.981	9.8614
12:38:08	-1.5597	6.7855	-1.0996	165.17	-16.607	1.1831	4.6564	0.25948	18.267	-18.044	1.5352	5.1582	3.9076	17.893	9.1424
12:38:09	-2.3318	5.3017	-2.0961	95.972	-19.307	-0.11992	3.03	-1.4507	4.9088	-20.672	2.4294	7.4744	6.2309	21.593	11.299
12:38:10	-2.0918	4.803	-2.2421	-46.602	-19.417	-0.58968	0.11456	-2.3038	-20.104	-20.846	2.3797	9.0778	7.0606	22.029	13.216
12:38:11	-2.199	4.7841	-2.0653	-73.974	-18.205	-0.68137	-0.43623	-1.6819	-23.644	-19.401	2.2803	8.0089	7.2266	22.029	13.456
12:38:12	-2.5934	5.3843	-2.0861	8.8073	-17.765	-0.31147	1.3105	-1.8037	-9.1413	-18.708	2.33	7.4744	7.2266	21.158	12.617
12:38:13	-1.8986	6.306	-1.4786	116.97	-16.746	0.53978	3.615	-0.5158	10.279	-17.451	1.8333	5.3364	4.5714	19.852	10.82
12:38:14	-1.4955	6.6701	-1.2039	110.11	-15.532	0.7559	3.5413	-0.34984	9.3448	-16.931	1.6346	5.1582	4.0736	18.546	12.498
12:38:15	-1.6114	6.2444	-1.5929	121.71	-14.885	0.07822	3.6955	-0.77212	11.933	-15.971	2.0816	7.118	6.0649	20.723	11.898
12:38:16	-2.1947	5.9037	-1.7226	2.1698	-14.54	-0.38836	1.2638	-0.91288	-8.8246	-15.834	2.181	7.2962	6.2309	19.852	10.94
12:38:17	-2.6191	5.2661	-1.8577	-69.207	-15.395	-0.46206	-0.26128	-1.2911	-21.858	-16.599	2.181	6.9399	5.733	20.287	11.179
12:38:18	-2.3019	5.5581	-1.9565	-30.116	-15.767	-0.48003	0.56507	-1.663	-15.006	-16.895	1.8829	7.4744	5.2352	19.634	10.221
12:38:19	-2.1818	6.9513	-0.99539	124.05	-14.87	1.3895	3.8639	0.86879	12.596	-16.354	1.2868	4.2674	3.4098	16.804	8.5433
12:38:20	-1.5514	7.1388	-1.3698	133.07	-16.457	0.1617	4.079	-0.4969	13.139	-17.169	1.8333	5.5145	6.0649	19.852	10.7
12:38:21	-2.4132	5.7089	-1.9093	123.75	-18.193	-0.06101	3.6482	-1.1818	10.818	-18.859	2.181	7.2962	6.7287	21.158	11.06
12:38:22	-2.5333	5.2077	-2.1695	24.82	-18.246	-0.22798	1.5992	-2.2912	-6.8078	-19.64	2.181	7.118	5.899	23.117	11.898
12:38:23	-2.1774	4.768	-2.1895	-78.729	-18.493	-0.02006	-0.53028	-1.5852	-25.364	-20.145	2.1313	7.8307	6.0649	22.029	12.737
12:38:24	-2.006	4.2727	-2.1687	-65.083	-19.94	-0.3556	-0.34252	-1.4633	-23.825	-21.554	2.2803	8.3652	8.2223	23.117	12.258
12:38:25	-1.1824	5.4382	-1.4107	68.228	-20.518	1.2486	2.5061	0.08722	-0.80325	-22.579	1.5352	5.6927	6.3968	21.593	11.419
12:38:26	-1.9844	5.1171	-1.971	109.41	-23.164	0.30571	3.2716	-0.71954	5.1971	-24.89	1.6346	6.7617	7.8904	23.117	14.055
12:38:27	-2.7477	4.5333	-2.3763	97.764	-23.881	-0.41134	2.9421	-1.8541	2.3453	-25.323	2.3797	8.8997	7.3925	25.947	14.894
12:38:28	-2.4176	4.0723	-2.6565	10.318	-24.309	-0.35401	1.1283	-2.2575	-13.351	-25.475	2.4791	8.3652	9.052	25.512	16.092
12:38:29	-2.2075	4.0369	-2.5168	-88.375	-22.752	-0.46366	-0.83971	-2.4697	-29.594	-23.893	2.5287	8.5434	9.218	25.73	17.051
12:38:30	-2.2204	3.8281	-2.5068	-81.468	-21.839	-0.53896	-0.73911	-2.8227	-28.331	-24.197	2.4791	8.3652	8.8861	25.73	15.972
12:38:31	-1.6112	5.6389	-1.4678	58.943	-20.778	0.88192	2.3585	-0.04094	-2.9267	-23.165	1.6842	5.5145	5.0692	21.376	13.097
12:38:32	-2.1602	5.1384	-1.582	93.493	-20.945	0.34824	2.956	-0.29726	3.4562	-22.731	1.8829	6.5835	5.899	22.247	14.894
12:38:33	-2.4862	5.1867	-2.0599	107.25	-20.795	-0.2198	3.2381	-1.4444	5.6538	-22.319	2.6778	8.187	7.8904	23.77	14.654
12:38:34	-1.963	4.9051	-2.2929	26.759	-20.642	0.16329	1.5923	-1.3667	-8.5154	-22.37	2.3797	8.5434	8.5541	23.77	14.175
12:38:35	-2.0359	3.6861	-2.584	-100	-23.205	0.00452	-1.1288	-2.2449	-32.38	-25.129	2.5287	8.7215	8.0563	25.73	15.733
12:38:36	-2.2418	2.974	-2.8904	-81.963	-26.633	-0.39655	-0.88743	-3.0076	-31.228	-29.195	2.5287	9.256	10.048	27.253	15.134
12:38:37	-1.8857	4.2573	-2.1841	62.763	-27.224	0.61508	2.2098	-1.3478	-6.671	-30.3	1.8829	7.8307	7.7244	24.859	15.014
12:38:38	-2.2416	3.888	-2.2304	90.226	-27.927	0.40716	2.6932	-1.0011	-2.6049	-31.116	1.8333	8.0089	10.546	26.6	16.572
12:38:39	-2.6276	3.7218	-2.9421	64.95	-27.72	-0.24436	2.1625	-2.8983	-6.9302	-30.849	2.1313	9.4342	10.214	27.907	18.009
12:38:40	-2.5333	3.1401	-2.6565	-56.586	-25.711	-0.22798	-0.35669	-2.2575	-26.31	-28.032	2.3797	9.6123	9.3839	26.818	17.77
12:38:41	-2.5977	1.7392	-3.3837	-146.92	-31.44	-0.60447	-2.3793	-4.0392	-45.828	-34.735	2.5784	10.503	12.205	30.301	18.968
12:38:42	-2.7307	0.58289	-3.9549	-78.762	-38.05	-0.84674	-1.2114	-5.3208	-38.593	-42.362	2.5287	11.394	13.865	33.784	20.286
12:38:43	-2.0101	1.8795	-3.3945	47.495	-39.373	0.15511	1.5232	-4.514	-17.691	-43.517	2.032	8.8997	12.039	31.825	21.364
12:38:44	-2.3617	1.2877	-3.5079	33.679	-39.869	0.24018	1.1467	-3.9425	-20.218	-44.066	2.4294	10.325	13.201	33.567	25.918
12:38:45	-3.2152	0.55351	-3.7989	-65.082	-39.306	-1.0039	-0.94273	-4.8207	-36.856	-42.657	2.8268	11.394	13.865	34.655	26.517
12:38:46	-3.2624	-0.05755	-3.9495	-173.32	-40.901	-1.0121	-3.1932	-5.0833	-28.339	-45.402	3.0255	11.572	15.026	35.744	26.996
12:38:47	-3.0951	0.47026	-3.8715	-111.15	-40.434	-0.83697	-1.8697	-4.8333	-45.367	-44.55	2.8268	11.572	14.528	35.308	26.876
12:38:48	-2.5805	2.2891	-3.176	32.101	-33.396	-0.23617	1.2749	-3.6484	-16.403	-36.771	2.7771	10.681	11.873	30.301	26.157
12:38:49	-1.8385	4.4798	-1.7843	103.89	-28.201	0.62327	3.0697	-0.45062	-0.93399	-31.781	1.5352	7.118	7.7244	23.988	20.885
12:38:50	-2.2331	2.337	-2.9421	-20.784	-33.448	0.18945	0.23386	-2.8983	-25.651	-38.014	1.9326	8.5434	11.209	28.124	20.646
12:38:51	-2.7049	1.493	-3.1243	-128.66	-31.867	-0.69615	-2.0571	-3.7576	-43.425	-34.886	2.5287	9.9687	11.707	31.172	22.563
12:38:52	-2.4648	2.6746	-2.7753	9.6644	-29.706	-0.36221	0.88561	-1.9234	-17.169	-32.12	2.2803	9.9687	10.38	29.213	21.245
12:38:53	-2.5634	2.6186	-3.0401	60.115	-31.013	-0.67158	1.8797	-2.4423	-9.1112	-34.121	2.181	10.147	11.043	28.777	20.286
12:38:54	-2.5848	2.4472	-3.0564	55.439	-31.095	-0.52917	1.7586	-3.1546	-10.37	-34.597	2.2803	10.325	12.205	28.56	21.364
12:38:55	-1.8128	2.8617	-2.526	-48.145	-32.53	0.77387	-0.22253	-1.2889	-29.124	-35.001	1.6842	7.8307	8.8861	28.777	19.807
12:38:56	-2.5333	2.208	-3.3674	-124.36	-35.955	-0.22798	-1.8417	-3.3269	-44.338	-40.455	2.181	8.8997	10.546	30.737	21.005
12:38:57	-3.0351	0.77597	-3.8606	-23.454	-38.134	-0.75348	-0.08284	-4.3585	-28.222	-41.913	2.9261	11.038	13.699	33.131	23.042
12:38:58	-2.8635	1.1002	-4.0012	24.653	-39.431	-0.28531	0.93161	-4.9741	-20.827	-42.447	2.6281	11.394	14.528	34.873	24.72
12:38:59	-2.9106	1.3304	-3.6476	2.0019	-36.632	-0.2935	0.51531	-3.7303	-22.844	-40.65	2.7274	11.216	12.869	32.696	25.319
12:39:00	-3.2495	-0.0628	-4.0629	-152.43	-39.447	-0.93683	-2.7835	-4.5118	-29.058	-41.601	2.7771	12.107	13.533	35.09	25.079
12:39:01	-2.5375	1.4934	-3.186	-62.31	-35.942	0.28273	-0.7339	-3.2954	-33.692	-40.376	2.181	10.325	12.205	31.172	24.6
12:39:02	-1.8128	2.1338	-2.7907	31.898	-36.111	0.77387	1.248	-1.8078	-17.588	-39.017	1.4855	7.6525	12.039	30.301	22.922
12:39:03	-3.0137	1.4724	-3.7364	20.28	-36.467	-0.89588	0.90498	-4.4551	-20.308	-40.158	2.4294	11.75	13.865	34.437	24.6
12:39:04	-3.1681	1.0432	-3.4925	-124.22	-32.556	-0.99575	-2.044	-4.058	-43.548	-35.623	1.9823	10.681	11.873	32.26	24.6
12:39:05	-2.7263	2.6714	-2.8487	-79.552	-24.662	-0.55374	-0.89434	-2.7638	-30.17	-27.541	2.4791	9.256	10.048	26.6	22.203
12:39:06	-2.4519	3.9869	-2.2921	74.731	-23.661	-0.28691	2.391	-0.5388	-1.91	-24.976	2.3797	9.0778	10.38	26.383	18.369
12:39:07	-1.8514	4.145	-1.8876	97.449	-25.779	0.54797	2.8747	-0.23208	0.5019	-28.429	1.4855	7.8307	7.7244	24.641	15.972
12:39:08	-2.8163	1.1558	-3.1343	-91.823	-31.662	-0.27712	-1.3856	-3.4046	-36.709	-34.156	2.4294	10.325	11.209	30.737	19.088
12:39:09	-3.1938	1.0645	-3.4771	-140.28	-33.657	-1.1464	-2.3596	-4.1736	-46.145	-37.356	2.8268	11.572	13.533	32.043	21.005
12:39:10	-2.8207	2.0614	-3.1135	11.569	-32.297	-0.57012	0.82476	-3.2828	-19.074	-34.575	2.6281	9.7905	12.205	30.954	20.885
12:39:11	-2.4862	3.5665	-2.953	65.073	-26.327	-0.2198	2.1355	-3.3732	-6.206	-30.221	2.5287	9.4342	9.052	27.253	21.005
12:39:12	-2.4604	3.2741	-2.4597	-40.156	-21.731	-0.0692	-0.01405	-2.3416	-21.54	-23.561	2.2307	9.0778	8.5541	24.859	18.848
12:39:13	-1.5254	4.8432	-1.4469	-35.333	-20.864	1.116	0.34967	0.08093	-19.425	-22.254	1.0384	6.4054	6.5628	21.376	14.415
12:39:14	-2.5248	3.8984	-2.4172	49.162	-26.163	-0.44569	1.8738	-1.27	-7.947	-29.268	1.9326	8.3652	8.5541	25.73	15.014
12:39:15	-2.7864	3.2479	-2.6774	62.73	-26.857	-0.63723	2.0345	-2.3793	-6.8686	-28.154	2.1313	8.8997	9.218	27.036	16.332
12:39:16	-2.6534	3.0677	-2.7762	-77.298	-26.868	-0.39496	-0.7799	-2.7512	-30.034	-29.159	2.2307	9.6123	10.877	27.471	18.009
12:39:17	-2.7006	3.0597	-2.8804	-79.585	-25.708	-0.40315	-0.82692	-3.3606	-30.368	-28.957	2.6281	9.9687	9.7158	27.036	17.77
12:39:18	-2.4733	4.2118	-2.1633	72.421	-23.359	-0.1445	2.3844	-1.2259	-2.375	-24.153	2.2803	8.5434	6.8947	24.859	16.332
12:39:19	-1.7141	5.1464	-1.5295	95.319	-24.403	1.0833	3.003	0.42132	1.0903	-26.494	1.4855	6.9399	6.8947	22.029	15.134
12:39:20	-2.7091	2.5668	-2.9113	-109.76	-28.932	-0.18544	-1.5056	-3.1294	-37.269	-32.294	2.2803	8.8997	11.375	28.124	17.89
12:39:21	-2.8678	2.5483	-2.9838	-70.762	-28.786	-0.57831	-0.73322	-3.142	-30.943	-30.031	2.4294	9.9687	9.7158	27.907	18.129
12:39:22	-2.7735	3.9387	-2.4289	60.735	-25.576	-0.56193	2.1089	-2.5727	-5.4902	-26.774	1.8333	9.6123	9.5498	26.383	18.249
12:39:23	-2.8508	2.8967	-2.7345	-15.285	-26.866	-1.0137	0.4223	-2.5075	-19.585	-30.084	2.0816	9.7905	10.048	27.253	17.77
12:39:24	-2.8336	2.6123	-2.8233	-118.72	-25.946	-0.64542	-1.6802	-3.2324	-37.483	-27.996	2.0816	9.0778	10.38	27.907	17.29
12:39:25	-1.7957	5.0338	-1.66	63.191	-22.987	0.33846	2.3447	-0.54729	-4.1693	-23.857	1.1875	5.3364	5.0692	22.464	15.493
12:39:26	-2.4862	4.3619	-2.3655	92.986	-24.045	-0.2198	2.8211	-1.3792	0.49355	-25.814	2.2307	8.187	8.7201	25.294	16.811
12:39:27	-2.5333	3.3489	-2.7553	-63.043	-21.99	-0.22798	-0.45731	-2.6294	-24.94	-24.609	2.6281	9.4342	9.8817	25.512	16.931
12:39:28	-2.5506	3.598	-2.4026	-58.333	-21.069	-0.59628	-0.32281	-2.2134	-23.483	-22.984	2.5287	9.6123	8.0563	25.077	15.972
12:39:29	-2.2246	4.9376	-2.2104	102.76	-19.008	-0.02824	3.1036	-1.707	5.448	-18.923	2.2307	8.187	7.7244	23.553	14.415
12:39:30	-1.8687	5.8131	-1.3898	87.16	-14.129	0.17967	2.9363	0.20909	5.5504	-14.837	1.6842	6.2272	5.899	20.07	12.498
12:39:31	-1.3411	6.4578	-0.69436	-38.905	-12.488	0.85577	0.53879	1.394	-14.233	-13.703	1.1875	5.3364	3.0779	18.11	10.82
12:39:32	-2.0916	4.7767	-1.7534	57.264	-15.764	0.21402	2.1632	-0.68175	0.2951	-17.82	1.7339	8.3652	6.2309	21.593	11.179
12:39:33	-2.4778	5.2482	-1.8214	103.03	-16.923	-1.2412	3.1575	-1.2848	7.028	-18.484	2.1313	7.6525	7.8904	22.682	11.179
12:39:34	-2.5204	4.7494	-2.1487	-39.412	-15.632	-0.15268	0.24214	-2.1693	-17.195	-15.638	2.1313	7.118	6.5628	21.811	11.539
12:39:35	-2.5462	5.1003	-2.019	-27.839	-14.628	-0.30328	0.53119	-2.0285	-14.738	-13.998	2.33	7.8307	5.4011	20.94	11.06
12:39:36	-2.2973	5.7785	-1.8839	121.51	-16.609	0.61667	3.6146	-1.6504	10.748	-17.118	1.9326	7.6525	6.5628	20.287	9.7416
12:39:37	-1.7355	6.5603	-1.1876	100.99	-15.724	1.2257	3.3397	0.36244	8.1431	-17.582	1.5352	4.2674	4.0736	17.457	8.3037
12:39:38	-2.7093	4.5431	-1.9719	-76.419	-18.657	-0.98915	-0.52371	-1.5474	-24.899	-21.099	2.5287	7.2962	6.5628	21.811	11.659
12:39:39	-2.6534	5.066	-1.8831	73.288	-16.717	-0.39496	2.5328	-0.82251	2.6944	-18.217	2.4791	8.0089	7.3925	20.94	12.737
12:39:40	-2.5333	5.7302	-1.8677	107.6	-16.401	-0.22798	3.3325	-0.93808	7.6948	-17.314	2.3797	8.5434	7.0606	20.94	11.179
12:39:41	-2.5377	4.5004	-2.2267	-44.247	-17.685	-0.52099	0.10765	-2.4193	-19.376	-17.768	2.181	8.0089	6.0649	22.247	11.06
12:39:42	-1.8857	6.1769	-1.3644	13.856	-13.402	0.61508	1.5394	-0.25947	-5.7095	-12.936	2.0816	5.8709	5.2352	18.328	11.06
12:39:43	-1.4656	7.2273	-0.93827	158.59	-13.829	0.39579	4.5962	0.99696	18.913	-13.088	1.7339	4.6237	4.2395	16.369	8.6631
12:39:44	-2.4477	4.7096	-2.0136	15.512	-18.523	-0.7976	1.3302	-1.7911	-9.063	-19.379	1.9326	8.3652	6.0649	21.376	10.7
12:39:45	-2.5248	4.3262	-2.2729	-71.596	-17.048	-0.44569	-0.47011	-2.0726	-22.784	-18.275	2.2307	8.5434	7.3925	22.029	11.779
12:39:46	-2.4433	5.315	-1.9093	78.021	-14.815	-0.5046	2.6673	-1.1818	4.2829	-16.498	2.2803	7.2962	7.0606	20.287	11.898
12:39:47	-2.3918	5.6526	-1.9882	107.78	-15.957	-0.20341	3.319	-2.2597	8.7481	-18.008	2.032	7.118	5.0692	19.634	11.06
12:39:48	-2.1516	5.5179	-1.4161	-41.463	-14.167	0.13053	0.32996	-0.1502	-16.146	-16	1.8829	6.4054	4.5714	18.328	7.9442
12:39:49	-1.7828	6.4581	-1.0734	27.885	-11.429	0.41376	1.862	0.61877	-1.9318	-11.745	1.5849	5.1582	4.4054	17.457	7.9442
12:39:50	-2.4433	6.7184	-1.4578	124.35	-11.527	-0.5046	3.8235	-0.39393	14.308	-11.377	2.0816	6.5835	4.7373	18.763	9.3821
12:39:51	-2.4947	5.62	-1.6137	32.303	-12.273	-0.0021	1.8077	-0.89398	-2.1867	-11.506	2.2803	6.4054	5.2352	19.199	8.9028
12:39:52	-2.5805	5.2769	-1.5412	-43.481	-11.557	-0.23617	0.24249	-0.88139	-14.899	-10.611	1.9823	8.7215	7.3925	19.416	9.0226
12:39:53	-1.5555	7.6876	-0.46587	113.09	-8.7449	0.67241	3.7636	1.9067	13.694	-8.2711	1.1875	3.911	2.0822	14.845	6.746
12:39:54	-2.1774	6.1604	-1.1151	-57.206	-10.88	-0.02006	0.12216	0.37504	-16.899	-10.416	1.6842	5.8709	4.5714	17.675	7.2253
12:39:55	-2.349	6.3563	-1.3644	20.921	-11.539	-0.48822	1.7074	-0.25947	-3.5243	-11.919	1.9823	6.9399	5.0692	16.586	8.3037
12:39:56	-2.2632	6.2577	-1.4315	103.58	-13.411	-0.25415	3.3328	-0.03464	10.254	-14.404	2.032	7.4744	5.4011	18.981	8.1838
12:39:57	-2.3233	5.2049	-1.6337	2.1586	-15.615	-0.33763	1.1425	-0.18799	-8.8905	-16.946	2.2803	7.4744	6.5628	20.723	9.1424
12:39:58	-2.5678	4.4574	-2.2984	-78.493	-16.647	-0.96459	-0.58421	-1.6041	-23.981	-18.282	2.4294	7.6525	7.5585	22.682	10.341
12:39:59	-1.4311	6.6487	-1.0108	126.24	-14.91	1.1324	3.857	0.98436	12.337	-17.055	1.1378	4.8019	3.2438	17.893	8.6631
12:40:00	-2.023	5.8936	-1.5303	110.06	-16.647	0.07981	3.4065	-0.40653	9.0157	-18.282	2.032	6.049	5.0692	18.546	10.101
12:40:01	-2.5506	4.4976	-2.0861	-66.954	-16.855	-0.59628	-0.3491	-1.8037	-21.722	-18.087	2.4294	8.187	8.7201	21.376	11.539
12:40:02	-2.5936	5.0737	-1.738	8.751	-17.395	-1.1152	1.2566	-0.79731	-9.4705	-17.486	2.33	7.2962	6.3968	20.505	11.659
12:40:03	-2.439	5.3339	-1.8885	105.27	-17.382	-0.21161	3.2181	-1.0599	7.0981	-17.407	2.2307	7.6525	5.5671	20.723	11.419
12:40:04	-2.5377	5.0604	-1.8831	27.131	-17.232	-0.52099	1.6193	-0.82251	-6.3428	-16.533	2.2307	8.0089	7.0606	19.852	10.94
12:40:05	-1.4224	6.0936	-0.99083	-32.459	-16.75	1.7184	0.61244	0.27838	-15.668	-16.063	1.3365	5.5145	4.4054	17.893	10.101
12:40:06	-2.2032	5.3203	-1.8622	56.835	-19.188	-0.17066	2.2575	-0.70064	-2.2067	-18.569	1.7339	6.9399	5.5671	22.464	11.539
12:40:07	-2.5462	4.9992	-2.2884	98.091	-20.8	-0.30328	3.023	-1.9571	4.2546	-20.469	1.8333	8.0089	7.5585	22.682	12.857
12:40:08	-2.7565	4.0265	-2.486	-46.647	-19.556	-0.99734	-0.02027	-2.7008	-20.368	-20.715	2.0816	8.3652	8.5541	23.553	13.576
12:40:09	-2.5934	4.5084	-2.1016	-41.779	-17.958	-0.31147	0.15467	-1.6882	-17.989	-18.895	2.181	8.7215	7.0606	22.464	12.857
12:40:10	-2.5119	5.7463	-1.7588	112.64	-14.085	-0.3704	3.4265	-0.91918	11.061	-15.523	2.181	8.187	5.733	20.287	11.659
12:40:11	-1.5811	6.804	-0.87572	126.56	-12.925	1.3255	3.884	1.3625	14.18	-15.322	1.4359	4.4455	4.9033	17.24	10.7
12:40:12	-2.2462	5.8205	-1.1096	-43.661	-13.215	-0.68956	0.33688	0.61247	-15.953	-15.603	1.9823	5.8709	5.5671	18.11	9.3821
12:40:13	-2.3918	5.604	-1.5875	27.502	-12.985	-0.20341	1.7137	-0.5347	-4.1702	-13.79	2.3797	7.118	4.7373	18.763	9.7416
12:40:14	-2.3962	6.2283	-1.5675	117.28	-12.864	-0.49641	3.6015	-1.2407	12.123	-12.611	2.2803	7.6525	5.4011	19.634	9.8614
12:40:15	-2.3189	6.0244	-1.7388	36.878	-11.68	-0.04462	1.9692	-1.6252	-1.52	-10.863	2.2803	7.4744	5.899	19.416	9.0226
12:40:16	-2.2547	6.0695	-1.2556	-38.793	-11.061	-0.47185	0.47137	-0.24057	-13.574	-10.062	2.0816	6.2272	4.4054	18.763	8.783
12:40:17	-1.3324	7.9688	-0.53385	126.84	-8.9514	1.4418	4.0862	1.3037	15.826	-8.5383	1.2868	2.6639	1.4184	14.627	6.1468
12:40:18	-2.1689	6.7344	-1.3019	129.05	-10.795	-0.23777	3.9175	0.10612	15.699	-11.327	1.9823	6.2272	4.9033	18.546	7.7046
12:40:19	-2.2418	6.1552	-1.4115	-36.37	-10.572	-0.39655	0.53187	-0.74062	-12.451	-11.905	2.0816	6.9399	5.4011	18.763	9.2623
12:40:20	-2.289	6.0751	-1.271	7.2857	-10.447	-0.40473	1.3849	-0.125	-4.9978	-12.115	2.181	7.118	3.5757	17.457	7.8244
12:40:21	-2.349	6.7586	-1.1776	136.01	-10.696	-0.48822	4.0586	0.00945	17.291	-12.158	1.9326	6.4054	4.4054	17.24	7.4649
12:40:22	-1.7612	6.8145	-0.86573	85.447	-10.257	1.0751	3.0645	1.0096	8.5747	-11.002	1.7836	4.4455	4.4054	16.586	6.3865
12:40:23	-1.3324	7.9118	-0.4296	-22.532	-9.53	1.4418	1.1107	1.913	-9.7923	-9.1016	1.4855	2.6639	2.9119	13.321	5.7874
12:40:24	-2.0831	6.7047	-1.271	76.206	-10.164	-0.00368	2.863	-0.125	6.7146	-9.5203	1.7836	5.6927	4.4054	17.457	7.5847
12:40:25	-2.1516	6.7264	-1.0162	126.76	-10.467	0.13053	3.8705	0.74694	15.365	-9.8814	2.0816	5.8709	3.9076	17.24	6.8658
12:40:26	-2.289	5.9062	-1.3753	-41.069	-10.754	-0.40473	0.39737	-0.73433	-13.842	-11.088	2.0816	7.118	5.4011	18.328	8.4235
12:40:27	-2.2717	6.1314	-1.5203	23.242	-11.564	-0.03644	1.714	-0.75952	-2.9935	-13.003	1.9326	7.118	5.0692	18.546	7.9442
12:40:28	-1.2682	7.7869	-0.72064	163.61	-10.571	1.0146	4.7847	1.0347	22.147	-12.368	1.2372	4.98	1.7503	14.192	6.8658
12:40:29	-1.7529	7.0982	-0.95455	55.584	-10.42	0.05365	2.5206	0.28468	3.5169	-11.956	1.6346	4.8019	3.4098	15.716	7.2253
12:40:30	-2.2032	6.0776	-1.3907	-36.426	-10.368	-0.17066	0.51839	-0.61876	-12.78	-10.713	1.9823	6.5835	5.2352	17.893	7.4649
12:40:31	-2.2075	6.9968	-1.1205	115.37	-10.193	-0.46366	3.6893	0.13761	13.962	-9.2167	2.2803	6.2272	3.7416	16.586	7.9442
12:40:32	-2.1475	7.4305	-0.9854	106.36	-9.3953	-0.38017	3.5821	0.5158	13.484	-7.8441	1.9823	6.2272	3.2438	16.369	6.6261
12:40:33	-2.3062	6.2622	-1.3598	-50.174	-9.6685	-0.77304	0.27671	-0.84989	-14.912	-8.9714	2.1313	7.118	5.899	17.675	7.3451
12:40:34	-1.4697	7.9741	-0.4613	106.41	-8.2601	0.90649	3.6765	1.3163	13.748	-8.7268	1.4855	4.4455	2.58	14.845	5.4279
12:40:35	-1.4012	8.1056	-0.35163	166.17	-8.0932	0.77228	4.8856	2.163	24.061	-9.1606	1.9326	4.4455	1.4184	13.974	5.0684
12:40:36	-2.4091	6.059	-1.3698	2.6992	-10.131	-0.57171	1.2908	-0.4969	-5.7303	-11.674	2.2803	6.049	4.5714	17.893	7.9442
12:40:37	-2.2846	6.0804	-1.3753	-13.415	-9.9814	-0.11173	0.97514	-0.73433	-8.6563	-10.8	2.2803	6.4054	5.4011	18.328	6.746
12:40:38	-2.1346	7.4977	-0.99625	147.65	-9.0491	-0.30488	4.415	0.04094	20.143	-8.1696	2.0816	6.4054	3.2438	15.933	6.8658
12:40:39	-2.2248	7.1384	-0.74149	67.225	-8.6917	-0.83196	2.7558	0.91288	6.3687	-7.4905	2.181	6.4054	2.4141	15.933	6.8658
12:40:40	-1.1352	7.8317	-0.33164	21.372	-8.2367	1.2568	1.9636	1.457	-0.89089	-7.1801	1.2372	3.1984	1.5843	12.886	3.99
12:40:41	-1.8132	7.6288	-0.78319	140.73	-9.5548	-0.83355	4.3009	0.66916	18.814	-10.186	1.8829	4.98	4.0736	16.369	6.2667
12:40:42	-2.2418	6.6914	-1.4215	94.631	-11.165	-0.39655	3.2256	-0.38763	10.106	-12.548	2.1313	6.5835	3.9076	17.893	6.746
12:40:43	-2.3877	5.775	-1.562	-34.184	-12.213	-0.71412	0.51148	-1.0032	-12.71	-13.038	2.181	7.118	4.9033	18.981	7.4649
12:40:44	-2.2204	6.7691	-1.4215	94.597	-11.126	-0.53896	3.2391	-0.38763	9.9082	-11.384	2.032	6.4054	5.4011	17.675	7.5847
12:40:45	-2.1604	6.8656	-1.2864	122.13	-11.379	-0.45547	3.8034	-0.00945	14.369	-10.04	2.181	6.049	4.7373	17.675	7.4649
12:40:46	-1.4184	7.371	-0.47673	0.4567	-9.7947	0.40398	1.473	1.4318	-5.8003	-8.2991	1.1875	3.5547	1.2524	14.41	6.1468
12:40:47	-1.5813	7.3259	-1.0062	76.173	-11.308	0.52181	2.9708	0.39393	6.5171	-10.567	1.1378	4.2674	3.4098	16.151	6.027
12:40:48	-2.1689	6.8897	-1.271	128.98	-11.91	-0.23777	3.9445	-0.125	15.304	-12.677	2.2307	6.7617	5.2352	18.11	8.1838
12:40:49	-2.4348	5.8848	-1.4995	-25.09	-12.418	-0.72231	0.71305	-0.63765	-11.706	-13.768	2.1313	7.118	4.4054	19.416	7.8244
12:40:50	-2.1689	6.1849	-1.2193	16.335	-12.006	-0.23777	1.5864	-0.23427	-4.2569	-13.234	1.8333	6.7617	4.7373	18.11	8.783
12:40:51	-2.1217	6.9219	-1.4061	138.12	-11.913	-0.22958	4.1326	-0.5032	16.571	-11.752	1.8829	6.4054	5.5671	17.893	8.6631
12:40:52	-1.3027	7.0874	-0.68436	30.083	-11.944	0.27795	2.0169	1.041	-2.1251	-10.523	1.2372	3.7329	3.0779	15.933	5.4279
12:40:53	-1.6156	6.8569	-1.0788	-13.528	-11.405	0.58892	1.11	0.38134	-9.3147	-10.661	1.4855	4.4455	3.9076	16.586	7.8244
12:40:54	-2.3104	6.4906	-1.3173	103.58	-13.373	-0.26233	3.3733	0.22169	10.254	-13.24	2.032	6.7617	5.4011	19.199	8.3037
12:40:55	-2.2547	5.952	-1.4215	16.256	-13.369	-0.47185	1.546	-0.38763	-4.7178	-14.628	1.9823	6.9399	5.5671	19.199	9.3821
12:40:56	-2.3361	5.7026	-1.4995	-55.065	-13.618	-0.41292	0.08828	-0.63765	-17.422	-14.671	2.2803	6.9399	4.4054	19.199	8.4235
12:40:57	-2.2761	6.512	-1.4841	87.453	-12.504	-0.32945	3.0576	-0.75322	7.2622	-12.858	2.032	6.4054	4.9033	18.981	9.0226
12:40:58	-1.5213	7.3794	-0.71521	69.208	-11.295	0.6053	2.8432	1.2722	4.9245	-10.488	1.4855	4.0892	3.4098	15.063	7.1054
12:40:59	-1.8601	7.1779	-0.91913	-55.065	-11.679	-0.03803	0.34447	-0.53688	-17.422	-11.326	1.9326	5.5145	4.0736	17.022	8.4235
12:41:00	-2.2075	6.7208	-1.3435	80.624	-12.503	-0.46366	2.957	-0.1376	6.4596	-13.32	2.181	6.7617	4.2395	18.546	8.5433
12:41:01	-2.0446	6.343	-1.3798	39.278	-12.486	-0.5815	2.0701	-0.1439	-0.52832	-14.166	2.2803	6.4054	5.5671	18.763	8.4235
12:41:02	-2.2846	5.6141	-1.5095	-80.352	-13.535	-0.11173	-0.42898	-0.28466	-21.813	-14.656	2.33	6.5835	5.5671	19.199	8.9028
12:41:03	-2.2805	6.37	-1.3119	69.084	-13.484	-0.62245	2.668	0.45911	4.2003	-12.951	2.1313	6.5835	4.9033	18.981	8.1838
12:41:04	-1.6457	7.1119	-0.9437	103.57	-12.77	0.14532	3.4812	0.75953	10.188	-11.592	1.1875	4.8019	3.2438	18.546	7.7046
12:41:05	-1.8429	5.9488	-1.2502	-73.591	-14.009	0.33027	-0.23397	-0.00315	-21.405	-13.196	1.4855	5.6927	5.733	19.852	7.5847
12:41:06	-2.349	5.9789	-1.8477	45.904	-14.582	-0.48822	2.1438	-1.6441	-0.91081	-15.61	2.2307	7.2962	4.7373	19.852	10.221
12:41:07	-2.3748	6.1853	-1.66	82.697	-15.201	-0.63882	2.9096	-0.54729	5.5421	-16.874	1.7836	6.9399	5.2352	19.634	9.6217
12:41:08	-2.4047	5.0384	-1.7951	-89.874	-16.166	-0.27871	-0.71145	-0.92548	-25.319	-17.35	2.032	6.7617	6.0649	20.723	10.58
12:41:09	-2.4735	5.6736	-1.9348	25.057	-16.046	-0.9482	1.6801	-0.71324	-5.4253	-15.71	1.9823	7.118	5.733	20.287	10.461
12:41:10	-1.8171	6.5683	-1.2602	103.29	-15.484	0.48086	3.3868	0.34984	8.5423	-14.301	1.5352	5.8709	3.4098	18.11	9.5019
12:41:11	-1.697	5.7589	-1.3536	-39.39	-16.541	0.64784	0.41743	0.21539	-17.063	-16.721	1.5352	6.4054	6.0649	18.981	9.5019
12:41:12	-2.5292	4.8701	-1.9719	-5.0196	-18.646	-0.7387	0.94749	-1.5474	-11.734	-20.095	2.33	7.6525	6.8947	22.682	11.179
12:41:13	-2.5506	4.8946	-2.2729	68.352	-20.119	-0.59628	2.4118	-2.0726	-0.07905	-21.662	2.4294	7.2962	7.7244	22.682	12.258
12:41:14	-2.6449	3.9432	-2.3038	-92.714	-19.888	-0.61266	-0.94724	-1.8415	-28.878	-20.31	2.3797	8.187	8.5541	25.077	12.617
12:41:15	-2.3748	5.0709	-1.8677	-14.328	-17.382	-0.63882	0.79985	-0.93808	-13.989	-17.407	1.7339	7.8307	7.5585	21.593	13.097
12:41:16	-1.5641	6.6701	-1.1768	109.97	-16.992	0.89011	3.5413	0.8373	8.489	-18.419	1.3365	6.2272	3.9076	18.981	9.8614
12:41:17	-1.7957	4.8456	-1.7434	-78.774	-19.553	0.33846	-0.51679	-1.0347	-25.627	-21.641	1.8333	6.049	4.7373	21.811	12.378
12:41:18	-2.5549	4.372	-2.5748	-14.767	-22.089	-0.88929	0.67849	-3.4257	-16.557	-23.778	1.9326	8.187	8.8861	24.206	12.737
12:41:19	-2.4261	4.3108	-2.4289	56.34	-23.665	-0.13631	2.0823	-2.5727	-5.1035	-23.589	2.1313	8.0089	8.2223	25.077	14.654
12:41:20	-2.825	2.8935	-2.9738	-104.9	-26.622	-0.86312	-1.3577	-3.495	-34.89	-28.19	2.6281	9.4342	9.7158	27.471	15.733
12:41:21	-2.765	2.7225	-2.8904	-42.961	-27.516	-0.77964	-0.15546	-3.0076	-24.902	-29.657	2.7771	9.4342	11.043	27.907	16.931
12:41:22	-2.0187	5.1517	-1.8205	74.753	-23.347	0.37281	2.5933	-0.45692	-1.7783	-23.611	1.8333	6.7617	7.0606	22.9	15.253
12:41:23	-2.1346	4.8295	-1.8677	-83.8	-23.756	-0.30488	-0.61084	-0.93808	-28.928	-25.533	1.4359	6.049	6.0649	22.464	13.696
12:41:24	-2.7477	3.6197	-2.7453	-8.2984	-26.001	-0.41134	0.68472	-2.9824	-17.861	-27.851	1.9823	8.5434	10.546	27.689	16.332
12:41:25	-2.6707	4.0509	-2.5585	26.207	-25.867	-0.76326	1.444	-2.7134	-11.741	-26.594	2.2803	9.7905	9.5498	26.383	16.691
12:41:26	-2.7735	2.9442	-2.8804	-134.79	-26.04	-0.56193	-1.942	-3.3606	-40.146	-29.015	2.6281	8.7215	9.052	26.6	17.171
12:41:27	-2.6578	4.2356	-2.5585	12.493	-24.641	-0.68796	1.2023	-2.7134	-13.676	-25.07	1.7836	8.8997	8.8861	25.73	17.051
12:41:28	-2.2416	4.5249	-2.2675	28.54	-25.09	0.40716	1.5719	-1.8352	-11.145	-27.693	1.4359	8.187	8.5541	23.988	15.733
12:41:29	-1.9887	4.4707	-2.0599	-98.066	-26.032	0.0127	-0.9469	-1.4444	-34.088	-26.622	1.9326	6.9399	6.8947	24.859	15.733
12:41:30	-2.7779	3.7403	-2.4543	25.948	-28.08	-0.85493	1.3901	-2.1041	-13.256	-30.603	2.7274	8.5434	9.7158	27.689	17.77
12:41:31	-2.765	3.0946	-2.9113	-47.717	-28.126	-0.77964	-0.18208	-3.1294	-26.622	-28.991	2.4791	8.8997	10.711	27.253	17.41
12:41:32	-2.7565	2.3097	-3.0364	-116.61	-27.984	-0.99734	-1.6872	-3.8606	-38.203	-30.509	1.8829	9.7905	9.5498	27.471	19.327
12:41:33	-2.6405	3.0656	-2.9113	32.754	-27.877	-0.31966	1.4098	-3.1294	-12.585	-28.948	2.2307	9.9687	10.877	28.124	17.53
12:41:34	-1.963	3.4346	-2.0144	-61.296	-26.165	0.16329	-0.3968	-2.619	-27.767	-28.805	2.1313	6.9399	7.7244	25.294	17.41
12:41:35	-1.7999	4.7201	-1.9148	-26.701	-24.61	0.84916	0.51079	-1.4192	-21.12	-26.298	1.8829	6.7617	6.8947	24.641	16.332
12:41:36	-2.7779	3.7725	-2.4806	35.436	-24.321	-0.85493	1.5782	-2.4634	-9.9471	-26.017	1.9326	8.8997	10.38	26.6	17.41
12:41:37	-2.6449	3.7638	-2.5477	-99.836	-21.318	-0.61266	-1.1153	-2.2386	-31.393	-23.027	2.2307	9.6123	9.3839	25.294	16.931
12:41:38	-2.6707	4.3213	-2.4651	15.028	-21.787	-0.76326	1.2628	-2.579	-11.894	-22.954	2.6778	8.0089	7.3925	23.988	15.134
12:41:39	-2.7606	3.4269	-2.6674	3.1508	-24.608	-0.48663	0.87938	-2.7323	-16.128	-27.223	2.0816	8.5434	9.8817	26.6	15.733
12:41:40	-2.1045	4.0209	-2.1016	-93.243	-22.998	0.13872	-0.93376	-1.6882	-31.973	-24.861	1.3365	7.6525	7.3925	23.117	14.295
12:41:41	-2.0787	4.209	-2.0499	49.252	-24.17	0.28932	1.9277	-1.7974	-7.4203	-25.605	2.3797	7.8307	7.7244	25.947	14.894
12:41:42	-2.6449	3.3783	-2.4443	-77.073	-22.32	-0.61266	-0.72596	-2.4571	-28.717	-25.129	2.2803	9.0778	10.214	25.512	16.931
12:41:43	-2.4562	4.6263	-2.0136	-30.555	-17.722	-0.5799	0.40327	-1.7911	-17.573	-19.394	1.8829	7.2962	6.2309	21.811	14.774
12:41:44	-2.4305	4.7526	-2.1904	49.826	-18.659	-0.4293	2.0221	-2.413	-4.0626	-20.174	2.4791	8.3652	7.8904	22.682	13.097
12:41:45	-2.7521	4.1359	-2.1333	-104.15	-18.245	-0.70434	-1.1419	-2.2849	-30.545	-20.102	2.3797	8.5434	7.7244	22.682	12.737
12:41:46	-1.4654	6.7984	-1.0579	79.824	-17.651	1.1995	2.9705	0.5032	1.7852	-19.922	0.88942	4.0892	4.2395	18.981	11.299
12:41:47	-2.572	4.7603	-1.8468	-14.542	-18.991	-0.45387	0.74591	-0.81621	-15.24	-20.232	2.33	6.9399	7.8904	22.464	12.617
12:41:48	-2.6062	4.2433	-2.2467	-51.459	-19.844	-0.38677	-0.07387	-1.7133	-22.417	-21.46	2.33	8.3652	6.8947	23.335	12.737
12:41:49	-2.4562	4.1849	-2.5331	42.637	-22.087	-0.5799	1.7866	-3.182	-6.9719	-24.703	1.7339	8.5434	8.8861	25.077	14.055
12:41:50	-2.5591	2.8907	-2.8496	-127.83	-24.443	-0.37858	-1.8144	-3.5917	-38.553	-26.732	2.7274	8.5434	9.7158	26.6	14.295
12:41:51	-2.4305	4.308	-2.3817	33.171	-23.012	-0.4293	1.6255	-2.0915	-10.149	-24.941	2.33	8.3652	6.8947	24.859	14.535
12:41:52	-1.654	4.9691	-1.7426	-21.697	-21.661	1.1667	0.64529	-0.20689	-17.952	-23.626	1.0384	6.4054	7.2266	22.682	13.816
12:41:53	-2.8637	3.8176	-2.3038	-40.313	-22.816	-1.089	0.08033	-1.8415	-22.462	-25.678	2.4791	7.8307	8.0563	25.512	14.535
12:41:54	-2.7434	4.0107	-2.8187	14.859	-23.41	-0.11833	1.2089	-3.8228	-12.881	-25.858	2.032	8.5434	9.8817	25.947	16.092
12:41:55	-2.6106	3.0166	-2.5223	-113.93	-23.411	-0.67977	-1.5188	-2.7071	-35.565	-25.396	2.181	9.4342	9.218	25.947	15.972
12:41:56	-2.3575	4.442	-2.0444	49.432	-22.528	-0.27052	1.9682	-1.56	-6.3669	-24.934	2.5784	8.0089	7.5585	24.859	15.493
12:41:57	-2.3361	4.0209	-2.1641	-92.905	-20.709	-0.41292	-0.93376	-2.0537	-29.998	-23.23	1.6346	6.9399	9.052	23.77	15.493
12:41:58	-1.7313	5.8558	-1.1613	54.447	-18.49	0.71495	2.3049	0.72174	-3.1326	-21.533	1.3862	6.5835	4.2395	19.634	12.737
12:41:59	-2.7477	3.6784	-2.5177	-35.727	-22.735	-0.41134	0.14741	-3.2976	-21.73	-25.201	2.181	8.0089	9.8817	25.73	13.935
12:42:00	-2.765	3.7774	-2.3301	-51.864	-23.631	-0.77964	-0.15477	-2.2008	-24.787	-25.743	1.7836	8.3652	7.8904	24.859	15.733
12:42:01	-2.4176	3.7697	-2.6474	12.583	-23.604	-0.35401	1.1214	-3.4383	-13.149	-25.584	2.8268	9.256	9.3839	25.294	15.613
12:42:02	-2.4691	3.4612	-2.6265	-97.717	-22.681	-0.6552	-1.1222	-3.3165	-32.047	-24.421	1.7339	7.8307	8.8861	25.947	15.253
12:42:03	-2.173	5.4088	-1.6754	81.864	-20.063	0.27294	2.7748	-0.43172	0.67019	-22.269	2.2803	6.7617	6.8947	22.464	14.295
12:42:04	-2.2503	5.2741	-1.4732	-67.336	-18.024	-0.17885	-0.21426	-0.27836	-23.961	-20.218	1.3862	6.2272	6.3968	20.505	13.336
12:42:05	-2.5892	4.9159	-1.8114	52.227	-17.142	-0.82217	2.0961	-1.6378	-3.0709	-19.294	2.1313	7.118	6.2309	22.464	13.336
12:42:06	-2.2676	4.5459	-1.9982	-53.386	-16.04	-0.54715	-0.06696	-1.9067	-20.644	-18.022	2.2307	8.3652	7.7244	22.247	13.336
12:42:07	-2.2503	5.2801	-1.6183	45.488	-16.923	-0.17885	2.0224	-0.30356	-3.3468	-18.484	1.7836	7.6525	5.5671	20.723	12.258
12:42:08	-2.6619	4.6263	-1.9356	-30.431	-16.495	-0.17725	0.40327	-1.5411	-16.849	-18.333	2.6778	7.2962	8.2223	23.117	11.898
12:42:09	-1.9457	6.2332	-1.2764	29.61	-14.842	0.53159	1.8686	-0.36244	-4.8902	-16.657	0.93909	6.4054	3.4098	18.981	9.6217
12:42:10	-1.5213	6.0377	-1.1613	18.025	-15.793	0.6053	1.6065	0.72174	-7.4129	-17.517	2.181	5.1582	6.0649	18.546	10.101
12:42:11	-2.3276	4.6344	-2.0653	-28.245	-18.288	-0.63063	0.45029	-1.6819	-17.108	-19.415	1.6346	7.4744	6.0649	22.464	10.82
12:42:12	-2.8292	4.2598	-2.3255	19.964	-17.404	-0.35242	1.3434	-2.7912	-9.1204	-19.416	2.5287	8.187	8.8861	24.423	12.018
12:42:13	-2.9322	4.8323	-1.8477	-60.237	-15.186	-0.9548	-0.15409	-1.6441	-21.578	-17.257	1.8829	7.118	5.733	20.94	12.498
12:42:14	-2.3833	5.6068	-1.7951	50.142	-14.898	-0.42111	2.1704	-0.92548	-2.2192	-16.513	2.33	8.187	7.5585	19.634	11.299
12:42:15	-1.3239	6.0695	-1.213	-39.266	-13.865	1.2241	0.47137	0.831	-16.339	-15.177	1.2372	3.911	3.4098	17.893	8.9028
12:42:16	-2.0488	7.0101	-1.2293	96.423	-14.03	-0.07079	3.3266	0.11872	7.5422	-15.668	1.9823	5.8709	6.3968	18.11	8.6631
12:42:17	-2.9235	4.6449	-1.7797	-69.399	-16.248	-0.3688	-0.36915	-1.041	-22.977	-17.827	1.9823	8.0089	5.899	20.94	11.779
12:42:18	-2.4091	4.7071	-2.1595	59.191	-16.466	-0.57171	2.1967	-2.6442	-1.4783	-19.099	2.4294	7.118	8.2223	22.682	11.659
12:42:19	-2.3361	4.5644	-1.9048	-92.511	-17.282	-0.41292	-0.83937	-1.7722	-27.693	-18.701	2.181	8.5434	5.733	22.247	11.779
12:42:20	-2.5462	5.5774	-1.7017	63.957	-16.456	-0.30328	2.4391	-0.79101	0.30763	-17.632	2.4294	6.2272	7.0606	20.723	10.101
12:42:21	-1.8344	6.1472	-0.9437	-39.435	-14.8	0.11256	0.48485	0.75953	-17.327	-16.881	1.2868	6.049	3.0779	18.328	9.3821
12:42:22	-1.8772	5.8666	-1.5929	79.79	-17.279	0.39738	2.8087	-0.77212	1.5877	-19.626	1.9823	6.5835	7.5585	18.763	11.539
12:42:23	-2.4006	4.0289	-2.2004	-90.46	-20.202	-0.78941	-0.88674	-2.06	-28.743	-21.676	1.9326	8.5434	6.7287	23.117	12.617
12:42:24	-2.7176	4.5571	-2.466	38.219	-20.671	0.03225	1.76	-3.4068	-6.7169	-22.066	2.7771	7.4744	9.052	24.206	12.737
12:42:25	-2.4519	4.4948	-1.8939	-90.291	-18.89	-0.28691	-0.80583	-1.2974	-27.755	-21.525	2.032	8.0089	6.0649	22.464	13.216
12:42:26	-1.7014	5.4462	-1.572	70.516	-18.035	0.35484	2.5532	-0.65025	-0.46989	-21.223	1.8829	7.118	6.3968	21.158	12.617
12:42:27	-1.9586	5.2447	-1.4886	-53.555	-17.624	0.45629	0.0544	-0.1628	-21.631	-19.763	1.7339	5.3364	4.7373	20.94	12.258
12:42:28	-2.2676	5.2507	-1.7434	59.315	-17.502	-0.54715	2.2911	-1.0347	-0.75411	-19.048	1.7339	6.4054	5.899	21.811	12.378
12:42:29	-2.0702	4.5189	-1.9973	-83.44	-18.024	0.07161	-0.66477	-1.0788	-26.821	-20.218	2.6778	8.0089	6.2309	22.029	12.138
12:42:30	-2.6877	4.7526	-2.2892	49.894	-17.016	-0.32785	2.0221	-2.7849	-3.6676	-19.966	1.5849	6.4054	8.2223	22.464	12.378
12:42:31	-2.632	4.1468	-1.9565	-78.898	-18.824	-0.53736	-0.63815	-1.663	-26.352	-20.665	2.33	8.7215	6.5628	21.811	12.138
12:42:32	-1.5427	5.5319	-1.5512	72.905	-17.776	0.74771	2.6137	-0.5284	0.456	-19.712	1.4855	6.2272	7.2266	21.158	11.299
12:42:33	-1.8772	4.803	-1.4841	-46.658	-16.699	0.39738	0.11456	-0.75322	-20.434	-19.525	1.3365	5.6927	4.5714	21.376	11.179
12:42:34	-2.8635	4.4633	-1.7371	33.599	-19.084	-0.28531	1.6525	0.03054	-7.647	-21.251	2.7274	7.4744	8.5541	22.9	12.857
12:42:35	-2.4176	3.9219	-2.3526	-76.487	-17.764	-0.35401	-0.63158	-3.9784	-25.294	-19.17	1.8829	8.187	6.5628	22.464	13.216
12:42:36	-2.1604	5.746	-1.5558	45.589	-14.964	-0.45547	2.1033	0.06203	-2.7542	-17.373	2.4294	6.5835	6.0649	19.852	11.179
12:42:37	-2.782	4.5833	-2.175	-64.79	-16.302	-0.34423	-0.28859	-2.5286	-22.113	-18.145	2.33	8.8997	6.7287	22.682	11.179
12:42:38	-1.7914	5.7327	-1.5729	64.036	-15.877	0.63146	2.466	-1.4781	0.76848	-17.068	1.2868	4.8019	4.2395	19.416	9.2623
12:42:39	-1.4826	5.9625	-1.0888	-25.721	-15.376	0.8312	0.72654	0.73434	-15.393	-18.37	2.2307	5.3364	7.3925	19.199	9.7416
12:42:40	-2.7691	4.6239	-2.3101	13.101	-18.176	-0.26893	1.2697	-2.9068	-10.121	-20.167	1.9823	6.9399	6.5628	22.9	11.659
12:42:41	-2.6062	4.1898	-2.0807	-44.427	-19.981	-0.38677	0.05372	-1.5663	-20.429	-21.792	2.5287	8.7215	8.7201	22.9	12.258
12:42:42	-2.289	4.5756	-2.2058	-0.81612	-18.6	-0.40473	0.98759	-2.2975	-13.24	-21.706	2.5287	6.9399	6.7287	23.335	12.498
12:42:43	-2.7735	4.463	-2.1124	-32.854	-18.851	-0.56193	0.32927	-2.163	-17.973	-20.824	1.8829	8.187	7.7244	22.464	11.06
12:42:44	-1.6927	6.3109	-0.83403	29.497	-16.537	0.94084	1.8821	1.6063	-5.5486	-18.109	1.4359	3.3765	3.9076	17.457	10.221
12:42:45	-1.8859	5.2906	-1.8948	3.9055	-17.608	-0.18863	1.203	-2.1252	-11.717	-20.609	1.7339	7.2962	6.0649	20.287	11.299
12:42:46	-2.7348	4.2461	-2.1533	-28.515	-21.745	-0.33604	0.38287	-1.5789	-18.689	-23.178	2.181	7.4744	8.3882	22.682	12.977
12:42:47	-2.7779	4.1177	-2.5023	1.2575	-20.999	-0.85493	0.95371	-3.4131	-14.157	-23.511	2.6281	8.5434	7.3925	24.859	13.696
12:42:48	-2.2632	4.2031	-2.0553	-63.156	-21.907	-0.25415	-0.30899	-2.0348	-25.598	-24.595	1.9823	7.8307	9.052	24.641	14.055
12:42:49	-2.8549	4.0964	-2.3772	17.226	-23.702	-0.50301	1.2694	-2.6819	-12.087	-25.215	2.2803	8.187	8.0563	24.641	14.295
12:42:50	-1.8599	5.2769	-1.6817	-44.607	-19.507	0.76568	0.24249	-1.497	-21.483	-23.252	1.9326	5.6927	4.7373	20.94	11.898
12:42:51	-1.7228	5.8103	-1.8322	63.529	-21.413	0.49724	2.4795	-1.7596	-2.1942	-23.583	1.5352	5.6927	6.8947	20.723	12.737
12:42:52	-2.958	2.9177	-2.7462	-97.717	-23.327	-1.1054	-1.2166	-3.8102	-32.047	-25.844	2.7274	9.256	7.5585	26.165	15.134
12:42:53	-2.7691	4.4179	-2.1478	42.547	-23.104	-0.26893	1.8271	-1.3415	-7.4986	-26.422	2.4791	7.6525	9.218	24.423	14.654
12:42:54	-2.5593	3.2444	-2.7199	-93.345	-26.209	-1.1823	-1.0686	-3.4509	-32.565	-27.656	2.1313	9.256	9.5498	26.818	15.853
12:42:55	-2.6405	3.9813	-2.3872	28.551	-23.82	-0.31966	1.4775	-2.329	-11.079	-27.318	2.6281	8.0089	8.7201	25.294	16.092
12:42:56	-2.1171	4.321	-1.8568	-51.887	-25.286	0.86713	-0.06039	-0.46322	-24.919	-26.955	1.7339	6.4054	7.7244	24.641	15.373
12:42:57	-1.68	4.4392	-1.8631	26.241	-24.016	0.21243	1.5114	-1.5285	-11.544	-26.581	1.4855	6.9399	6.5628	23.117	15.733
12:42:58	-2.7006	3.3168	-2.5214	-72.7	-26.302	-0.40315	-0.6454	-1.8793	-29.236	-29.137	2.8268	7.8307	11.043	27.253	16.332
12:42:59	-3.0351	2.9743	-2.9013	-15.364	-27.42	-0.75348	0.43578	-3.4824	-20.046	-29.563	2.6281	9.6123	9.218	28.124	16.811
12:43:00	-2.3147	3.2339	-2.3755	-52.067	-25.764	-0.55533	-0.24916	-1.0263	-25.972	-28.813	2.0816	8.0089	9.218	26.818	17.171
12:43:01	-3.0395	2.5511	-3.1243	-47.672	-29.543	-1.0465	-0.27647	-3.7576	-26.359	-31.166	2.9261	9.9687	11.043	29.43	18.369
12:43:02	-1.7656	4.9639	-1.311	-1.5483	-25.815	0.78206	1.055	1.287	-17.519	-30.518	0.88942	5.8709	5.733	24.206	15.972
12:43:03	-2.4477	2.16	-2.8504	-70.818	-31.238	-0.7976	-0.80064	-4.4195	-31.273	-32.617	2.181	7.8307	10.711	29.866	19.088
12:43:04	-2.8506	3.194	-2.6357	2.7115	-29.043	-0.21001	0.83892	-2.1356	-18.696	-32.004	2.8268	9.7905	9.3839	28.342	19.327
12:43:05	-3.108	1.4101	-3.0518	-107.8	-32.115	-0.91226	-1.6609	-3.745	-38.845	-35.392	1.7339	9.0778	11.375	31.39	19.927
12:43:06	-2.5421	2.222	-3.1189	-9.0756	-32.005	-0.81399	0.44201	-3.5202	-22.404	-35.218	2.4791	10.147	12.371	31.172	20.286
12:43:07	-3.0307	2.0687	-2.8596	-119.43	-32.667	-0.46048	-1.7746	-3.2387	-41.631	-35.333	2.6778	9.4342	10.048	32.26	20.885
12:43:08	-1.8042	3.4567	-2.3709	55.326	-32.911	0.55616	1.9339	-1.6167	-11.029	-37.227	1.1875	5.8709	9.8817	28.777	19.687
12:43:09	-2.7521	1.4528	-3.264	-140.38	-33.851	-0.70434	-2.2922	-3.5454	-46.738	-37.082	3.0255	10.325	11.541	32.478	21.364
12:43:10	-3.331	1.7158	-3.4616	-20.908	-36.302	-0.87792	0.12599	-4.2892	-26.375	-40.13	2.7771	9.9687	12.371	34.22	23.641
12:43:11	-2.6062	1.3216	-3.2686	-133.65	-33.918	-0.38677	-2.1781	-2.955	-46.528	-37.942	2.1313	10.503	13.367	32.913	23.162
12:43:12	-2.8807	2.6396	-3.1615	-22.79	-31.895	-0.65361	0.24078	-4.5918	-24.338	-35.045	2.9261	10.503	10.048	30.954	22.563
12:43:13	-2.8549	3.7211	-2.1741	-68.035	-23.091	-0.50301	-0.48393	-1.7007	-28.042	-26.343	2.2307	7.2962	10.048	26.383	19.807
12:43:14	-1.5298	4.7711	-1.9048	10.329	-24.169	0.82301	1.2497	-1.7722	-13.285	-26.067	1.2868	6.2272	6.7287	24.423	16.691
12:43:15	-2.8248	3.8953	-1.9556	-40.606	-24.936	-0.05942	0.09382	-0.83511	-24.174	-28.669	2.6778	8.3652	8.7201	25.512	16.332
12:43:16	-2.9923	1.5067	-3.4108	-80.182	-31.291	-1.0383	-1.0966	-5.2263	-33.857	-33.398	2.5784	9.4342	12.537	32.043	18.609
12:43:17	-2.3104	4.2328	-2.0073	-10.654	-23.02	-0.26233	0.74557	-0.72584	-18.589	-26.871	1.9823	8.8997	7.5585	25.947	17.29
12:43:18	-2.9964	3.2069	-2.767	-81.456	-22.351	-0.52758	-0.84698	-3.9321	-28.265	-23.901	3.0752	8.5434	9.7158	26.383	17.65
12:43:19	-1.6455	5.3658	-1.3735	47.606	-16.88	0.94903	2.0829	0.92137	-4.001	-19.171	2.0816	5.5145	6.2309	21.811	14.055
12:43:20	-2.1302	4.5511	-1.806	-74.368	-21.25	-0.01187	-0.47668	-1.4003	-25.948	-22.629	1.3365	6.2272	5.899	23.117	13.216
12:43:21	-2.2246	4.0992	-1.8568	40.237	-20.97	-0.02824	1.7261	-0.46322	-7.9637	-23.815	2.5287	7.2962	9.052	25.077	13.696
12:43:22	-2.6447	2.5133	-3.2811	-102.79	-28.455	0.19105	-1.378	-5.0855	-35.61	-29.974	2.4294	8.7215	9.5498	29.648	15.853
12:43:23	-2.9364	3.3038	-2.4797	12.29	-24.532	-0.4441	1.0405	-1.6356	-14.861	-29.601	2.1313	9.0778	10.546	27.253	16.452
12:43:24	-2.5763	3.2793	-3.1043	-61.273	-26.846	-0.74688	-0.42377	-4.4636	-27.635	-27.149	2.8765	8.7215	10.38	28.995	17.41
12:43:25	-2.6362	4.8593	-1.5866	-30.848	-19.699	-0.02666	0.44372	0.29315	-19.285	-23.903	2.181	6.5835	6.0649	22.9	15.134
12:43:26	-2.6984	4.8918	-1.8839	45.206	-21.043	1.0817	1.955	-1.6504	-4.9927	-22.362	1.2868	5.5145	6.7287	22.9	12.857
12:43:27	-2.6019	4.3717	-1.8459	-81.377	-20.741	-0.09376	-0.64472	0.01164	-27.804	-21.538	2.4791	7.8307	7.5585	24.423	13.216
12:43:28	-2.6534	3.5207	-2.6936	7.8837	-25.23	-0.39496	0.98691	-3.0916	-14.54	-27.1	2.5287	8.8997	9.218	28.124	15.493
12:43:29	-2.9622	3.3997	-2.3963	-93.401	-26.92	-0.59469	-1.0416	-1.1481	-32.894	-30.402	2.7274	9.0778	10.048	29.43	16.092
12:43:30	-2.7348	2.7333	-3.1769	-17.719	-27.24	-0.33604	0.34831	-4.4762	-20.774	-29.455	2.33	8.187	9.7158	30.083	17.41
12:43:31	-2.3189	3.8551	-2.0227	-52.146	-28.017	-0.04462	-0.14129	-0.61028	-26.433	-28.355	2.4791	8.187	9.7158	27.253	17.171
12:43:32	-2.4176	2.7358	-2.3726	-61.42	-26.438	-0.35401	-0.51816	-3.2724	-28.491	-29.932	2.1313	7.2962	8.3882	27.471	17.171
12:43:33	-2.5292	3.0118	-2.6619	-27.129	-31.634	-0.7387	0.21415	-2.4949	-23.622	-34.46	2.2307	8.7215	10.048	29.213	18.848
12:43:34	-3.4425	1.8277	-3.4208	-121.66	-29.742	-1.2626	-1.8621	-4.8733	-41.635	-34.208	2.4294	9.4342	12.537	32.043	19.567
12:43:35	-2.6578	2.23	-2.8642	-6.6979	-32.991	-0.68796	0.48903	-2.6483	-21.544	-32.999	2.8765	10.147	10.546	32.043	19.687
12:43:36	-2.9964	2.0768	-3.1769	-117.02	-29.774	-0.52758	-1.7276	-4.4762	-40.573	-32.517	2.9261	9.6123	11.541	32.913	20.166
12:43:37	-2.1043	3.5955	-2.215	-15.679	-30.889	0.94243	0.54365	-1.1166	-21.889	-33.868	1.8829	6.7617	9.7158	28.995	19.567
12:43:38	-2.023	3.2258	-2.2429	-54.827	-30.61	0.07981	-0.29618	-3.1316	-29.071	-35.053	1.9326	7.8307	8.3882	30.083	19.927
12:43:39	-3.1766	2.3741	-2.8859	-98.382	-28.352	-0.77805	-1.311	-3.598	-35.931	-32.193	2.8268	9.7905	10.546	31.172	20.406
12:43:40	-2.4176	3.2877	-2.6674	7.4895	-29.022	-0.35401	0.94645	-2.7323	-16.844	-29.533	2.9261	9.256	11.541	28.995	19.447
12:43:41	-3.2194	2.1705	-2.953	-112.28	-28.052	-0.49324	-1.6201	-3.3732	-38.919	-30.907	2.6281	8.3652	10.214	30.083	19.208
12:43:42	-2.5161	2.9261	-2.7816	-29.596	-32.45	0.14032	0.15364	-2.9887	-25.009	-34.062	2.4791	8.8997	9.8817	29.43	19.208
12:43:43	-2.5632	2.7921	-2.6265	-45.598	-28.832	0.13213	-0.18899	-3.3165	-27.276	-33.588	1.9823	8.5434	10.546	30.083	18.848
12:43:44	-2.1174	3.3409	-2.0699	-66.22	-30.845	0.06342	-0.50433	-1.0914	-30.474	-35.017	2.1313	7.118	8.3882	26.383	18.129
12:43:45	-2.9967	1.9729	-3.3274	-13.583	-32.169	-1.3313	0.30751	-4.7388	-22.675	-35.71	2.6778	9.0778	10.711	31.825	20.646
12:43:46	-3.0908	2.8239	-2.4226	-103.13	-29.027	-0.54396	-1.3241	-1.5074	-37.585	-32.85	2.4791	8.8997	11.707	29.866	20.046
12:43:47	-2.5848	2.2031	-3.2503	-36.403	-31.035	-0.52917	-0.10878	-5.3167	-25.68	-30.962	2.4294	9.0778	10.711	31.607	20.885
12:43:48	-2.9364	3.6462	-2.438	-45.429	-26.993	-0.4441	-0.04067	-1.3918	-26.289	-28.949	2.5287	9.256	8.0563	27.253	19.208
12:43:49	-1.7614	2.8428	-2.6474	-75.461	-29.045	0.27135	-0.77333	-3.4383	-32.334	-31.542	2.181	7.8307	9.8817	29.213	18.489
12:43:50	-2.3359	4.1527	-1.9302	32.754	-29.001	0.39077	1.5985	-1.3037	-12.585	-32.229	1.8333	6.4054	9.218	27.036	18.009
12:43:51	-2.3918	2.9257	-2.7816	-95.858	-25.606	-0.20341	-1.1696	-2.9887	-34.215	-31.176	2.5287	8.7215	9.218	28.777	19.567
12:43:52	-3.2325	2.7599	-2.9684	-54.422	-29.126	-1.3722	-0.37709	-3.2576	-26.701	-32.019	2.6281	9.0778	9.8817	30.737	19.208
12:43:53	-2.3962	3.0974	-2.4126	-24.706	-28.033	-0.49641	0.27466	-1.8604	-22.499	-32.677	2.1313	9.0778	11.043	29.43	18.129
12:43:54	-3.2237	2.0072	-3.1977	-114.5	-28.306	-0.78624	-1.6941	-4.5981	-38.857	-33.805	2.7274	9.7905	11.707	32.696	18.728
12:43:55	-1.7099	3.9572	-1.8976	21.316	-29.979	0.57254	1.3365	0.12091	-14.252	-33.247	1.8333	7.118	8.2223	27.471	17.65
12:43:56	-2.4517	3.1562	-2.6474	-52.292	-27.592	0.51681	-0.26264	-3.4383	-27.289	-32.447	2.2307	6.5835	9.7158	29.43	16.572
12:43:57	-2.632	1.9082	-3.0301	-98.776	-31.93	-0.53736	-1.3919	-2.7953	-38.235	-37.134	2.7771	9.4342	12.205	31.825	19.327
12:43:58	-3.3395	1.6301	-3.4362	-23.207	-36.743	-0.66021	0.06549	-4.7577	-26.774	-40.361	2.5784	9.9687	11.707	32.913	19.567
12:43:59	-2.8851	0.41394	-3.8878	-126.86	-35.304	-0.94661	-2.1989	-5.5456	-45.923	-41.345	2.6778	11.929	13.533	37.703	21.484
12:44:00	-2.9877	2.9285	-2.4906	-73.173	-29.284	0.05842	-0.71282	-2.1104	-32.001	-34.823	2.7274	9.0778	11.873	29.866	21.604
12:44:01	-2.173	2.4416	-3.1769	9.6531	-30.656	0.27294	0.84515	-4.4762	-17.235	-33.441	2.181	7.6525	9.7158	30.083	20.046
12:44:02	-2.3316	3.5549	-1.8359	-93.931	-29.242	0.68378	-1.0147	-0.34135	-35.989	-35.047	2.2803	7.2962	8.3882	27.471	18.489
12:44:03	-2.8034	1.5308	-3.1406	-73.466	-30.207	-0.20182	-0.95553	-4.4699	-33.713	-35.986	2.8765	9.7905	12.039	31.39	20.166
12:44:04	-2.9665	2.9502	-2.7979	-22.227	-27.721	-0.88769	0.29471	-3.7009	-21.046	-30.387	2.7771	8.8997	11.209	28.777	19.927
12:44:05	-3.0266	2.7463	-2.5785	-102.7	-25.497	-0.97118	-1.3376	-2.0075	-35.084	-30.54	2.5784	8.8997	10.38	27.689	18.129
12:44:06	-2.8121	2.1467	-3.2911	-52.416	-26.529	-0.78783	-0.43793	-4.7325	-28.013	-31.876	2.5287	9.6123	11.043	30.301	18.249
12:44:07	-2.2973	4.273	-1.7951	0.81818	-26.631	0.61667	0.98067	-0.92548	-16.725	-30.12	1.9326	7.4744	7.2266	25.294	16.452
12:44:08	-2.1045	3.0194	-2.2221	-91.226	-26.564	0.13872	-1.062	-3.0097	-33.219	-29.26	2.1313	7.2962	8.7201	27.253	16.572
12:44:09	-3.2366	2.8082	-2.9113	-41.057	-27.015	-0.86154	-0.09496	-3.1294	-26.807	-30.958	2.4294	9.6123	11.209	29.43	17.53
12:44:10	-2.7735	2.5378	-2.6102	-29.574	-29.624	-0.56193	0.08622	-2.6042	-24.877	-31.643	2.8268	9.6123	10.546	28.995	17.89
12:44:11	-3.0737	1.635	-3.4733	-110.21	-32.854	-0.97937	-1.6674	-5.5919	-39.902	-32.666	2.7274	10.147	11.541	33.131	19.327
12:44:12	-3.1851	2.2405	-2.8433	-48.156	-30.447	-0.56034	-0.3304	-2.5264	-29.19	-34.099	2.3797	9.4342	11.209	29.213	19.687
12:44:13	-2.0315	2.8432	-2.6828	-9.3009	-32.25	0.29751	0.54988	-2.6168	-23.72	-36.649	2.0816	7.8307	10.877	29.866	18.489
12:44:14	-2.9148	1.6056	-3.224	-96.939	-37.475	0.21721	-1.3988	-4.9574	-40.536	-40.411	2.4791	9.256	12.039	33.131	21.964
12:44:15	-3.0951	0.77562	-3.4662	-90.099	-37.345	-0.83697	-1.406	-3.6988	-39.667	-42.471	2.8765	10.503	12.869	34.002	23.761
12:44:16	-3.1895	1.472	-3.603	-46.263	-33.608	-0.85335	-0.41822	-5.7326	-31.161	-39.893	2.8268	10.503	12.537	34.655	24.001
12:44:17	-3.3781	0.97359	-3.2749	-122.15	-34.596	-0.88611	-2.0104	-4.0203	-44.466	-37.211	2.8268	10.681	13.533	34.873	24.001
12:44:18	-2.6663	2.0743	-2.8958	-73.184	-30.952	-0.47025	-0.86114	-3.245	-32.067	-30.948	2.8268	9.9687	12.703	30.954	23.042
12:44:19	-2.6318	4.0509	-1.9419	26.162	-23.768	0.26635	1.444	-2.6064	-12.005	-26.075	1.8829	7.4744	8.8861	28.124	19.687
12:44:20	-1.8128	4.4469	-1.2393	-37.936	-20.069	0.77387	0.23523	0.47171	-21.602	-25.124	1.7339	7.2962	6.3968	21.376	17.53
12:44:21	-2.8637	3.1051	-2.6528	-88.713	-24.509	-1.089	-1.0015	-3.6758	-31.569	-28.055	2.4294	9.0778	9.052	28.342	18.009
12:44:22	-2.9622	3.4511	-2.5902	10.295	-24.554	-0.59469	1.0204	-3.3102	-13.482	-26.905	2.6281	8.7215	9.5498	28.124	17.051
12:44:23	-2.4519	3.7722	-2.215	-31.107	-21.466	-0.28691	0.25494	-1.1166	-20.799	-24.364	2.4791	8.5434	9.5498	25.294	15.493
12:44:24	-3.0222	3.3703	-2.6736	-79.371	-20.406	-0.67818	-0.77299	-3.7976	-29.117	-22.869	2.6281	8.7215	10.38	28.342	16.212
12:44:25	-1.847	4.3133	-1.4578	12.797	-20.892	0.84097	1.2158	-0.39393	-11.898	-21.95	1.7339	5.6927	6.8947	23.335	13.336
12:44:26	-2.1516	4.5917	-1.4724	3.4775	-23.509	0.13053	1.0816	0.54949	-14.219	-25.027	2.2307	7.118	6.5628	24.641	14.535
12:44:27	-3.1681	2.9446	-2.7262	-67.719	-19.506	-0.99575	-0.61877	-4.5162	-26.199	-23.715	2.4791	8.3652	9.052	28.124	15.733
12:44:28	-2.2975	4.7281	-1.4524	-23.253	-13.084	-0.18703	0.55782	-0.1565	-14.006	-18.126	2.2803	7.118	6.3968	21.376	14.055
12:44:29	-2.4733	5.5424	-1.5666	31.897	-14.342	-0.1445	1.7942	-0.41283	-4.5569	-17.496	2.4294	6.5835	7.0606	20.723	12.258
12:44:30	-2.9493	3.3811	-2.3209	-53.566	-19.119	-0.51939	-0.26922	-3.3816	-21.697	-18.634	2.6281	8.0089	9.218	26.383	11.898
12:44:31	-1.4396	5.4539	-0.75605	6.6774	-14.767	1.3501	1.277	1.8563	-8.553	-13.868	1.3862	4.4455	4.5714	17.893	9.2623
12:44:32	-1.7357	6.6641	-0.75234	-2.0224	-7.7482	0.42195	1.3046	0.43803	-7.2529	-9.0236	1.9326	5.1582	3.0779	16.586	9.0226
12:44:33	-2.6921	5.6148	-1.8331	53.229	-7.0026	-0.62085	2.2174	-2.5875	2.7885	-8.8941	2.181	6.9399	4.9033	19.634	9.0226
12:44:34	-2.1431	6.541	-1.0471	7.3758	-9.2357	-0.08717	1.4658	0.97806	-4.4711	-10.67	2.181	6.2272	4.4054	17.022	7.2253
12:44:35	-2.4648	5.3493	-1.806	-22.656	-11.926	-0.36221	0.66569	-1.4003	-10.516	-11.832	2.2307	6.9399	6.2309	19.199	7.4649
12:44:36	-2.7006	5.4326	-1.6609	23.231	-9.5696	-0.40315	1.5927	-1.3751	-3.0593	-9.8027	2.181	6.5835	5.5671	20.287	6.8658
12:44:37	-2.5001	8.5068	0.23587	81.097	-4.8535	0.9802	3.2671	4.1569	9.2248	-6.6698	1.3365	3.0202	1.0865	12.233	3.8702
12:44:38	-1.9287	7.0604	-0.82489	0.4567	-6.8097	0.09618	1.4191	0.42543	-5.8003	-8.7063	2.0816	4.98	2.58	15.28	5.4279
12:44:39	-2.8593	4.7897	-2.2438	-27.344	-11.731	-0.79602	0.47725	-3.9595	-11.842	-12.569	2.4294	6.2272	4.9033	20.723	7.1054
12:44:40	-2.2119	6.7526	-0.95912	23.344	-11.829	-0.75666	1.8219	0.87509	-2.401	-12.2	2.2803	6.049	3.9076	17.24	6.6261
12:44:41	-2.2246	6.6001	-1.2864	46.344	-9.0317	-0.02824	2.2517	-0.00945	1.6568	-9.4779	2.2803	5.5145	4.7373	17.893	6.9856
12:44:42	-2.4132	5.5368	-1.5837	-13.528	-7.0187	-0.06101	0.88075	-1.953	-9.3147	-8.0484	2.1313	6.049	4.7373	18.981	6.2667
12:44:43	-2.4273	7.995	-0.01975	23.704	-5.154	1.265	2.0376	2.4571	-0.29418	-7.956	0.98877	3.0202	1.4184	13.321	3.8702
12:44:44	-1.9887	7.066	-0.78775	46.513	-9.305	0.0127	2.3326	1.2596	2.6444	-10.605	2.6281	5.3364	3.5757	16.369	5.9072
12:44:45	-2.6663	5.7057	-1.766	34.894	-11.282	-0.47025	1.8682	-2.8123	-0.07581	-9.9458	2.1313	6.049	4.7373	19.199	7.2253
12:44:46	-2.1217	6.1821	-1.1213	-6.4061	-8.4988	-0.22958	1.1297	-0.69023	-6.8004	-7.3028	2.181	5.8709	3.9076	18.328	7.1054
12:44:47	-1.9243	7.4112	-0.60554	12.131	-5.222	0.38919	1.7081	2.1189	-2.751	-8.3535	2.4791	5.6927	2.4141	14.845	5.3081
12:44:48	-2.0872	6.8198	-0.58639	65.106	-4.5048	0.50702	2.6548	0.58509	7.023	-7.9204	1.9823	4.8019	2.2481	16.151	4.7089
12:44:49	-1.2682	7.7624	-0.52385	90.529	-5.1627	1.0146	3.3204	0.95068	12.204	-4.718	1.7339	3.1984	1.0865	12.45	2.6719
12:44:50	-1.9759	7.272	-0.63724	16.83	-7.7569	0.088	1.7752	1.5222	-1.3601	-5.7855	2.181	5.5145	2.2481	14.845	5.0684
12:44:51	-2.5805	5.9572	-1.3598	-3.9157	-8.8116	-0.23617	1.1363	-0.84989	-5.282	-9.1311	2.1313	6.2272	4.2395	15.716	5.0684
12:44:52	-2.1645	6.2493	-1.5266	35.075	-6.5377	0.05523	1.9626	-1.8248	0.97758	-7.1165	2.0816	6.049	4.2395	17.675	4.5891
12:44:53	-1.9158	7.3633	-0.66351	64.926	-5.1701	0.17148	2.7492	1.1629	5.9696	-7.1104	1.9326	5.3364	3.0779	14.41	4.4693
12:44:54	-1.6883	8.3487	0.09993	58.277	-4.6569	1.2338	2.7834	2.9509	6.2204	-7.8697	1.5352	2.842	1.2524	12.015	3.7504
12:44:55	-1.7099	6.434	-1.0442	21.237	-8.1291	0.57254	1.7209	-1.2681	-1.6809	-6.0816	2.032	4.4455	2.746	17.022	4.7089
12:44:56	-2.0145	6.4473	-1.6092	2.9358	-9.8886	-0.1379	1.3582	-1.4844	-4.3478	-9.3181	2.2307	5.5145	3.9076	17.24	5.5477
12:44:57	-2.3789	7.299	-0.78775	46.569	-8.1365	-0.12811	2.373	1.2596	2.9735	-8.4739	1.9823	5.8709	2.746	15.28	4.8288
12:44:58	-2.3233	6.576	-1.3444	39.65	-5.6944	-0.33763	2.1106	-0.96545	1.6443	-7.3557	2.032	6.2272	3.5757	17.022	5.6675
12:44:59	-2.0403	6.1045	-1.4849	-6.361	-5.1256	-0.2885	1.1162	-1.5811	-6.5371	-8.2596	2.2803	6.049	3.4098	17.675	6.2667
12:45:00	-1.444	8.5494	0.30842	49.161	-4.5692	1.0571	2.6358	4.1695	5.0845	-4.5378	1.6346	3.0202	-0.24111	12.45	3.5107
12:45:01	-1.8429	7.1115	-0.59097	37.588	-7.862	0.33027	2.158	1.1755	2.6277	-7.8092	2.0816	4.2674	1.9162	14.627	4.1098
12:45:02	-2.0016	6.1584	-1.6409	53.544	-8.3641	-0.06259	2.3118	-2.0811	4.632	-6.0452	2.1313	5.1582	3.7416	17.457	4.9486
12:45:03	-2.3575	6.6187	-1.1151	7.5785	-5.9961	-0.27052	1.4792	0.37504	-3.286	-8.1794	1.9823	5.3364	3.4098	16.369	5.1882
12:45:04	-1.9887	7.853	-0.40332	5.3698	-6.6978	0.0127	1.648	2.2723	-3.1585	-3.9609	1.9823	5.6927	1.9162	13.103	4.1098
12:45:05	-1.946	6.5732	-1.2773	16.92	-3.6937	-0.27212	1.6538	-1.1903	-0.83339	-6.4684	2.5287	4.98	4.0736	16.586	4.2296
12:45:06	-1.4481	7.8562	-0.45131	95.194	-4.6137	1.5678	3.4279	0.96327	13.398	-3.3886	1.4855	3.3765	0.92053	13.321	1.953
12:45:07	-1.6414	8.0674	-0.23195	44.597	-7.0917	0.43833	2.4608	2.6568	4.4836	-6.5956	1.2868	4.2674	1.4184	12.45	3.3909
12:45:08	-1.946	6.8275	-1.0162	0.80588	-5.9504	-0.27212	1.3786	0.74694	-3.7594	-4.6234	2.0816	5.5145	3.0779	14.41	4.2296
12:45:09	-2.3875	6.5249	-1.3761	3.1611	-3.4464	0.08958	1.3717	-1.5622	-3.031	-5.9626	2.181	5.3364	2.9119	16.151	3.6305
12:45:10	-2.0101	7.5239	-0.56469	44.586	-5.2755	0.15511	2.3664	1.5348	4.4178	-3.6361	2.2803	4.8019	2.4141	12.886	2.9116
12:45:11	-1.7315	8.1773	-0.44502	53.747	-3.3932	-0.08876	2.6624	2.0286	5.817	-5.1821	2.181	4.98	1.9162	13.321	3.2711
12:45:12	-1.354	7.7862	-0.42588	30.86	-5.5361	0.78047	2.1382	0.49471	2.4176	-4.5515	1.1875	2.4857	-0.40706	12.668	2.0728
12:45:13	-2.2717	6.7044	-1.1676	10.013	-7.3711	-0.03644	1.5397	-0.34354	-2.0968	-5.41	1.8829	4.6237	2.2481	15.716	2.5521
12:45:14	-1.8774	7.6925	-0.57469	26.206	-4.9512	-0.40633	2.0307	1.8878	1.2901	-6.3011	2.3797	5.6927	2.746	13.539	2.9116
12:45:15	-2.0488	7.8292	-0.78319	65.332	-5.3129	-0.07079	2.8301	0.66916	8.3397	-3.4196	2.032	5.1582	1.7503	14.192	3.3909
12:45:16	-2.3833	6.0457	-1.4024	21.586	-5.7929	-0.42111	1.6535	-1.9215	0.36	-4.7997	1.8829	5.3364	3.4098	16.586	4.3495
12:45:17	-1.5084	7.6925	-0.41332	26.352	-5.857	0.6806	2.0307	2.6253	2.1459	-3.6936	1.6842	3.911	1.2524	12.45	2.6719
12:45:18	-1.1138	8.9377	0.0228	49.465	-4.3677	1.1144	2.7032	3.5287	6.8621	-2.4203	1.7339	1.5949	-1.2368	9.6203	3.331
12:45:19	-2.173	6.9803	-1.231	44.574	-6.3065	0.27294	2.272	-1.537	4.3519	-5.7651	2.4791	4.98	2.746	15.933	3.5107
12:45:20	-1.7143	7.1437	-0.98082	46.963	-5.581	0.27954	2.346	-0.07462	5.2778	-3.0433	1.9326	5.5145	2.4141	13.974	3.7504
12:45:21	-2.0702	7.5424	-0.3879	5.6176	-5.528	0.07161	1.594	2.1567	-1.7101	-3.7958	1.8333	5.3364	1.9162	13.321	3.1512
12:45:22	-2.023	7.6442	-0.70521	12.559	-5.4458	0.07981	1.7486	0.91918	-0.24922	-4.4242	2.2307	4.98	1.7503	14.192	1.953
12:45:23	-1.6885	6.8785	-1.3707	37.723	-4.2687	0.43014	2.1175	-1.3247	3.4177	-3.2515	2.2803	4.2674	2.4141	15.716	2.9116
12:45:24	-1.2167	8.6407	0.1679	97.752	-4.2836	1.3157	3.6098	3.5539	15.311	-2.8684	1.2868	1.7731	-0.40706	10.056	1.5935
12:45:25	-1.7529	7.9202	-0.06601	47.11	-4.4752	0.05365	2.4809	2.8038	6.1337	-3.5188	1.4855	3.5547	0.75458	12.015	2.3125
12:45:26	-1.6844	7.1622	-1.1268	7.9165	-2.5289	-0.08057	1.5736	-0.92766	-1.3109	-2.9494	2.6281	5.5145	2.58	15.063	2.6719
12:45:27	-2.6106	7.0632	-1.1368	23.93	-3.8891	-0.67977	1.8758	-0.57467	1.0225	-3.998	2.3797	5.5145	3.2438	15.28	2.5521
12:45:28	-1.7529	7.6309	-0.4713	30.916	-2.6785	0.05365	2.1113	1.6693	2.7468	-3.8238	2.2307	4.6237	2.4141	13.103	3.3909
12:45:29	-1.6885	7.548	-0.63352	51.662	-4.4468	0.43014	2.5075	0.10393	6.6687	-3.8224	1.2372	3.1984	0.92053	14.192	1.5935
12:45:30	-1.371	8.1748	-0.62353	97.696	-4.2292	1.2159	3.5289	-0.24906	14.982	-2.5505	1.8333	2.842	-0.24111	12.886	1.4737
12:45:31	-1.4955	8.0139	-0.40332	51.685	-3.2882	0.7559	2.5884	2.2723	6.8004	-3.1584	2.2803	4.6237	1.4184	11.362	2.5521
12:45:32	-2.156	7.1381	-0.78319	0.99737	-3.6607	-0.16247	1.4326	0.66916	-2.6402	-4.1789	1.8829	5.1582	2.0822	13.756	3.1512
12:45:33	-2.096	6.9132	-1.153	3.2174	-3.9062	-0.07898	1.4391	-1.287	-2.7019	-3.5066	2.0816	5.5145	2.58	15.28	2.7918
12:45:34	-1.6586	7.647	-0.65809	35.48	-2.0739	0.07003	2.2053	1.4003	3.3477	-2.639	2.3797	4.8019	1.7503	13.974	2.1926
12:45:35	-1.4483	8.6862	-0.09144	88.5	-3.648	0.76409	3.4352	3.2724	13.385	-2.9123	1.4359	2.6639	0.25674	11.797	1.3539
12:45:36	-1.4313	7.9845	-0.3579	65.467	-5.0267	0.32868	2.8571	1.0977	9.1297	-3.9231	1.3862	2.842	0.42268	12.015	2.4323
12:45:37	-2.006	6.2517	-1.5475	-8.2882	-5.5782	-0.3556	1.0962	-1.9467	-4.7637	-4.3274	2.5287	5.8709	3.0779	17.675	3.6305
12:45:38	-2.1388	7.8691	-0.15399	10.238	-2.1963	0.20583	1.742	2.9068	-0.78008	-3.3544	2.0816	4.98	1.7503	12.886	1.953
12:45:39	-1.8001	7.6176	-0.40875	49.307	-4.1123	0.04546	2.474	2.0349	5.9403	-4.0994	1.6842	4.2674	1.5843	13.103	2.6719
12:45:40	-1.8516	6.4983	-1.2464	40.022	-2.3323	-0.25574	2.0971	-1.4214	3.8169	-4.1494	2.33	4.98	2.746	15.28	3.99
12:45:41	-1.6241	8.1584	-0.38876	26.386	-1.9923	0.80663	2.1116	1.3289	2.3434	-2.162	1.8333	4.0892	0.92053	12.233	1.953
12:45:42	-1.1094	9.0367	0.2613	33.294	-4.4072	1.4074	2.401	3.6884	3.6069	-3.1213	1.1875	3.5547	-0.57301	8.9672	2.642
12:45:43	-1.8473	6.7981	-1.0634	14.768	-6.6391	0.03727	1.6473	0.26578	-0.37672	-5.36	2.4791	4.8019	1.9162	15.933	3.2711
12:45:44	-2.1818	6.5225	-1.4024	46.907	-5.619	-0.31307	2.2382	-1.9215	4.9486	-4.5658	2.2307	4.98	2.9119	16.586	3.7504
12:45:45	-2.0488	7.7488	-0.65809	42.456	-4.6644	-0.07079	2.3599	1.4003	5.0061	-2.5739	1.7836	5.5145	1.7503	13.539	2.3125
12:45:46	-1.59	7.9548	-0.27365	12.672	-5.3324	-0.06419	1.8025	2.413	0.40915	-2.3006	2.2803	4.98	1.2524	12.233	2.0728
12:45:47	-1.0793	8.5949	0.08364	40.314	-5.5637	1.851	2.4612	2.2386	5.5286	-1.9977	1.7339	1.7731	-0.73895	13.321	2.8517
12:45:48	-1.7099	7.4462	-0.74777	44.777	-5.2949	0.57254	2.353	-0.15239	5.537	-2.6905	1.4855	3.3765	1.2524	13.974	2.5521
12:45:49	-1.7058	8.2871	-0.34163	63.19	-2.7787	0.06184	2.864	1.81	8.8622	-2.53	2.181	5.6927	1.7503	12.45	1.5935
12:45:50	-1.8001	8.0433	-0.46587	37.892	-4.3108	0.04546	2.3198	1.9067	4.4052	-3.0274	2.33	5.3364	1.5843	12.233	1.7133
12:45:51	-2.3575	6.1902	-1.4387	-3.6905	-6.1025	-0.27052	1.1767	-1.9278	-3.9653	-4.5727	1.9326	4.6237	3.4098	16.586	4.2296
12:45:52	-1.9887	6.5088	-1.5212	-1.4367	-6.1841	0.0127	1.2777	-1.5874	-3.8294	-5.0496	2.33	5.1582	3.4098	16.369	3.3909
12:45:53	-1.963	9.9821	0.62487	81.716	-4.844	1.5564	3.5233	4.5792	12.846	-1.779	1.8333	2.6639	-0.9049	8.9672	2.7318
12:45:54	-1.7184	8.4291	-0.3562	81.581	-5.3603	0.79025	3.2536	2.7534	12.056	-2.1552	1.4359	3.3765	0.58863	11.362	1.5935
12:45:55	-1.9802	6.9775	-1.0179	21.687	-5.6227	-0.20501	1.8153	-0.90876	0.95254	-3.066	2.33	4.4455	2.746	15.716	3.3909
12:45:56	-1.6844	7.604	-0.9137	1.0649	-5.5028	-0.08057	1.5135	-0.29945	-2.2452	-3.4271	2.2307	4.6237	2.2481	13.756	2.5521
12:45:57	-2.0101	7.7219	-0.4196	12.582	-5.3325	0.15511	1.7621	1.56	-0.11755	-2.994	1.8829	5.6927	1.7503	12.886	1.953
12:45:58	-2.0101	7.6711	-0.42417	42.467	-5.4546	0.15511	2.3464	2.1504	5.072	-2.8563	2.4791	4.2674	1.4184	12.45	2.5521
12:45:59	-1.9212	9.0986	-0.05687	95.521	-5.4781	1.0293	3.6436	1.623	15.307	-1.1211	1.1875	1.2386	-1.4027	10.491	2.612
12:46:00	-1.7272	7.3203	-0.91913	30.871	-4.3095	0.20424	2.0573	-0.53688	2.4835	-3.49	2.0816	4.98	1.4184	14.41	1.5935
12:46:01	-2.156	7.3256	-0.46587	10.328	-5.0564	-0.16247	1.6476	1.9067	-0.25338	-3.1569	2.2307	5.3364	1.7503	13.321	2.0728
12:46:02	-1.7529	7.8932	-0.45045	17.281	-5.3729	0.05365	1.8831	1.7911	1.2734	-3.5975	1.9823	4.2674	1.4184	11.362	2.5521
12:46:03	-1.9032	6.576	-1.5429	40.044	-6.006	-0.55693	2.1106	-2.5371	3.9486	-4.4788	2.2803	5.3364	2.9119	16.369	3.1512
12:46:04	-2.2246	6.8572	-1.1005	53.849	-5.2196	-0.02824	2.4332	-0.56837	6.4096	-4.1108	2.3797	6.2272	3.4098	15.28	2.3125
12:46:05	-1.0581	9.2109	0.76083	61.038	-5.4137	0.90491	2.9788	5.7852	9.3189	-1.7138	1.1378	1.5949	-1.4027	8.3141	2.5222
12:46:06	-1.2854	8.2521	0.02738	30.984	-5.5031	0.64625	2.2191	2.9383	3.1418	-2.6314	2.2803	3.3765	0.92053	11.362	2.1926
12:46:07	-1.9545	6.8918	-1.2256	19.433	-5.5356	-0.05441	1.7548	-1.2995	0.81669	-2.798	1.9823	5.3364	2.0822	15.063	2.7918
12:46:08	-2.0403	7.639	-0.92371	33.204	-5.418	-0.2885	2.1583	0.05354	3.0802	-3.3552	2.181	4.2674	1.9162	13.539	2.0728
12:46:09	-2.0101	8.0461	-0.19026	60.846	-5.4676	0.15511	2.7765	2.9005	8.1997	-2.3801	1.8829	4.98	1.4184	12.015	1.7133
12:46:10	-1.5813	8.0139	-0.41418	51.674	-5.4811	0.52181	2.5884	1.7974	6.7346	-2.3944	2.2803	4.2674	1.2524	11.362	2.5521
12:46:11	-1.8965	9.3179	0.01025	47.166	-5.4756	1.8412	2.7236	1.3981	6.4629	-1.6653	0.93909	2.3075	-0.57301	9.838	2.2825
12:46:12	-1.8599	7.3417	-1.1522	14.858	-5.4606	0.76568	1.7417	-0.45911	0.14997	-3.1091	2.032	4.8019	2.4141	14.845	2.0728
12:46:13	-1.8473	7.8828	-0.45501	58.581	-5.4712	0.03727	2.7025	2.3815	7.998	-2.8207	2.33	4.2674	1.7503	11.797	2.0728
12:46:14	-1.5171	8.6138	-0.20111	67.732	-5.4721	0.0946	3.012	2.4256	9.3314	-2.9146	1.7339	4.98	1.2524	11.144	2.6719
12:46:15	-2.1003	7.1489	-1.0751	26.274	-5.4699	-0.37197	1.9363	-1.0369	1.6851	-3.5354	2.6281	5.8709	2.746	14.845	3.8702
12:46:16	-2.0831	6.8516	-1.0125	7.9165	-5.4684	-0.00368	1.5197	-0.67134	-1.3109	-3.4483	1.9823	4.6237	2.0822	14.845	1.953
12:46:17	-1.8869	9.7009	0.88422	67.957	-5.4704	1.915	3.2007	4.8607	10.648	-1.9099	1.2372	1.5949	-1.9006	8.3141	2.642
12:46:18	-1.547	8.1237	-0.36248	60.813	-3.6047	0.45471	2.79	1.6882	8.0021	-3.599	2.2307	5.1582	0.92053	12.45	2.6719
12:46:19	-2.1988	6.9429	-1.2002	56.08	-4.6397	0.12234	2.4937	-1.7681	6.4137	-4.0101	1.8829	4.2674	2.2481	15.28	3.2711
12:46:20	-1.9374	6.8677	-1.2256	12.503	-5.2604	-0.48982	1.6137	-1.2995	-0.5784	-4.3493	2.6778	5.1582	2.4141	14.845	2.9116
12:46:21	-1.7187	7.2773	-0.62181	-3.6229	-5.5497	-0.01346	1.3655	1.4066	-3.5703	-4.631	2.032	5.8709	1.9162	14.192	3.0314
12:46:22	-2.0359	7.2668	-0.513	37.768	-5.3853	0.00452	2.1849	1.4255	3.681	-4.1396	2.2803	4.2674	1.4184	13.539	3.2711
12:46:23	-1.9727	8.7184	-0.07772	97.651	-4.5037	1.3567	3.6232	1.5011	14.718	-3.2152	1.3862	1.5949	-0.40706	10.926	1.5935
12:46:24	-1.7272	6.916	-1.3815	26.093	-6.5291	0.20424	1.8959	-1.7996	0.6317	-5.1867	1.7836	5.8709	2.9119	16.151	2.9116
12:46:25	-2.096	6.64	-0.79861	-8.3445	-6.8605	-0.07898	1.1636	0.78473	-5.0928	-5.2442	2.6281	4.98	3.4098	15.063	3.3909
12:46:26	-1.8473	7.3549	-0.56469	-3.6792	-7.1498	0.03727	1.379	1.5348	-3.8994	-5.5259	1.9823	4.4455	2.4141	13.756	4.1098
12:46:27	-1.9117	6.7635	-1.2564	49.093	-7.8521	-0.33922	2.3256	-1.0684	4.6895	-6.342	2.5784	6.049	2.9119	15.933	4.1098
12:46:28	-2.1174	6.6697	-1.1368	44.495	-7.177	0.06342	2.2181	-0.57467	3.8911	-5.6848	1.9823	4.0892	2.4141	15.716	3.2711
12:46:29	-1.2341	8.3539	0.33926	37.723	-5.4397	0.14374	2.3737	3.9384	3.4177	-4.4576	1.3365	1.7731	0.42268	12.015	2.7918
12:46:30	-1.6586	7.1542	-0.58011	5.4148	-7.0793	0.07003	1.5266	1.6504	-2.8952	-6.0535	2.4294	5.5145	2.9119	15.498	4.1098
12:46:31	-2.246	6.7365	-1.1005	19.14	-7.3971	0.11416	1.7278	-0.56837	-0.89506	-6.0316	2.0816	4.8019	2.0822	15.933	4.7089
12:46:32	-2.2717	6.4609	-1.5629	51.2	-7.7804	-0.03644	2.3187	-1.8311	3.9694	-7.3323	2.5287	5.6927	3.9076	17.457	5.0684
12:46:33	-1.7488	6.774	-0.65809	7.5898	-7.6691	-0.45706	1.5062	1.4003	-3.2202	-7.6215	2.032	4.8019	3.2438	14.627	3.7504
12:46:34	-1.4097	7.8397	-0.04516	23.682	-6.5661	0.98998	2.0107	2.9257	-0.42586	-6.8129	2.032	4.0892	1.2524	13.539	3.2711
12:46:35	-1.4483	7.0178	-0.9554	32.787	-7.6555	0.76409	2.0504	-0.54317	0.64423	-7.542	1.5849	3.7329	2.0822	16.151	4.8288
12:46:36	-1.8601	6.1423	-1.4432	48.654	-8.7572	-0.03803	2.2178	-1.3373	2.1218	-8.8131	2.4294	4.98	4.0736	18.11	5.9072
12:46:37	-2.0702	6.5382	-0.97454	-15.703	-9.446	0.07161	1.009	0.99066	-8.9897	-9.5498	2.4791	5.8709	3.7416	16.804	5.5477
12:46:38	-2.1174	6.3749	-1.0162	-18.058	-9.8169	0.06342	0.93503	0.74694	-9.7181	-10.308	2.0816	6.9399	4.5714	17.457	6.2667
12:46:39	-1.8259	5.5637	-1.6917	16.312	-10.795	-0.10514	1.4786	-1.144	-4.3886	-11.327	2.6281	5.5145	4.7373	19.852	5.5477
12:46:40	-1.3453	7.4732	-0.47673	73.986	-8.9612	1.3665	2.9508	1.4318	6.7763	-10.006	1.1378	2.842	1.9162	16.151	5.1882
12:46:41	-1.6885	6.4151	-0.67351	-6.5863	-9.9542	0.43014	1.1701	1.5159	-7.8538	-10.641	2.0816	6.049	3.2438	17.022	7.1054
12:46:42	-1.8859	5.8929	-1.2293	-22.768	-10.009	-0.18863	0.76008	0.11872	-11.175	-10.959	2.2803	5.8709	4.2395	17.457	7.3451
12:46:43	-2.6021	5.6414	-2.0662	16.222	-11.458	-0.89747	1.492	-2.5097	-4.9153	-11.442	1.9823	6.049	4.9033	19.416	7.3451
12:46:44	-1.9931	6.0163	-1.3744	34.658	-11.829	-0.28031	1.9222	0.09352	-1.4584	-12.2	2.7274	6.5835	4.4054	19.199	7.1054
12:46:45	-1.8042	6.2678	-0.91742	-4.4451	-11.703	0.55616	1.1902	1.1188	-8.3763	-12.873	1.8333	6.2272	4.2395	18.763	7.2253
12:46:46	-1.4354	7.513	-0.11314	18.724	-10.908	0.83939	1.8627	2.3227	-3.331	-10.575	1.4855	2.842	2.0822	15.933	6.027
12:46:47	-1.7272	5.5637	-1.7651	16.188	-13.113	0.20424	1.4786	-1.9845	-5.1128	-12.192	2.4294	6.2272	4.2395	20.287	7.7046
12:46:48	-2.2117	5.6627	-1.3019	0.08499	-13.634	0.04704	1.1764	0.10612	-7.9729	-13.825	2.032	6.9399	5.0692	20.07	7.8244
12:46:49	-2.349	6.2731	-0.96912	-25	-12.647	-0.48822	0.78047	1.2281	-11.179	-10.877	2.6281	5.6927	4.2395	17.893	7.3451
12:46:50	-2.0145	5.4511	-1.5783	-15.883	-12.726	-0.1379	0.82024	-1.7155	-10.043	-12.279	2.2307	6.049	4.7373	19.634	7.7046
12:46:51	-2.0488	5.5959	-1.8485	25.485	-12.619	-0.07079	1.6666	-2.4719	-2.9235	-11.181	1.9326	6.7617	4.7373	20.505	7.8244
12:46:52	-1.2079	8.1451	0.1679	44.191	-9.6562	1.9018	2.4743	3.5539	2.1135	-8.4293	1.8333	2.4857	1.9162	15.063	5.9072
12:46:53	-1.7658	6.5463	-0.61639	-13.314	-11.006	-0.02165	1.056	1.6441	-8.0638	-9.7436	1.7339	4.2674	3.0779	16.151	6.1468
12:46:54	-1.68	6.7901	-1.261	11.895	-9.807	0.21243	1.6003	-0.47801	-4.1336	-8.8412	2.3797	6.4054	3.5757	18.11	6.6261
12:46:55	-2.0702	5.7299	-1.6409	41.769	-9.4027	0.07161	2.0093	-2.0811	0.99009	-10.236	2.1313	6.5835	4.4054	19.199	6.6261
12:46:56	-2.0444	6.9775	-0.68893	21.191	-6.7862	0.22221	1.8153	1.6315	-1.9443	-7.1596	2.0816	5.5145	3.2438	15.716	5.0684
12:46:57	-1.4999	7.5959	-0.3979	-1.6619	-5.4569	0.4629	1.4664	2.5097	-5.1462	-8.3172	2.33	4.4455	2.58	13.539	4.3495
12:46:58	-0.94219	7.5319	-0.28536	46.659	-4.1648	1.5826	2.4135	1.1103	3.5002	-5.9331	1.2372	3.7329	1.4184	14.627	3.8702
12:46:59	-2.0488	6.7956	-1.163	58.187	-5.1553	-0.07079	2.5137	-0.93396	5.6937	-7.4935	2.1313	5.5145	3.4098	16.586	5.3081
12:47:00	-1.8687	6.9373	-0.80775	9.8211	-4.7967	0.17967	1.5802	1.9656	-3.216	-7.2769	2.33	5.1582	3.0779	14.845	5.5477
12:47:01	-1.6586	6.3588	-0.61639	-22.318	-4.7719	0.07003	0.84098	1.6441	-8.5414	-6.1928	1.8333	5.3364	3.0779	15.933	4.7089
12:47:02	-2.2032	6.4501	-1.552	25.823	-7.2375	-0.17066	1.815	-1.3562	-0.94838	-8.8578	2.4791	6.2272	3.9076	17.893	4.9486
12:47:03	-2.1947	6.4529	-1.4487	48.766	-8.2367	-0.38836	2.2717	-1.5748	2.7802	-7.1801	2.2803	4.6237	3.9076	18.328	4.5891
12:47:04	-1.9813	7.5774	-0.02974	37.542	-8.2206	2.1506	2.2389	2.8101	2.3643	-8.0258	1.3862	2.4857	0.92053	12.015	3.2711
12:47:05	-1.9158	6.9425	-0.83488	-10.88	-9.5227	0.17148	1.1705	0.77843	-6.8746	-6.7092	2.4791	5.8709	3.0779	15.28	4.7089
12:47:06	-2.3789	6.2948	-1.5058	25.688	-10.135	-0.12811	1.788	-1.7029	-1.7384	-10.286	2.0816	5.5145	4.0736	18.328	5.7874
12:47:07	-1.9717	6.1877	-1.3444	39.605	-7.8496	-0.42271	2.0432	-0.96545	1.3809	-7.2672	2.2307	5.5145	3.5757	17.893	5.5477
12:47:08	-1.9029	6.9425	-0.92828	-10.891	-6.4214	0.24678	1.1705	0.64397	-6.9404	-9.256	2.33	6.7617	3.0779	16.151	4.7089
12:47:09	-1.4053	8.0111	-0.0189	28.122	-4.6743	1.283	2.1317	3.285	-0.54918	-6.5615	1.1875	3.1984	0.75458	12.668	2.4323
12:47:10	-1.1996	7.8373	-0.47673	67.09	-6.158	0.88034	2.8771	1.4318	5.5787	-9.5959	2.1313	3.1984	1.0865	15.498	4.7089
12:47:11	-1.946	5.8824	-1.7397	18.803	-7.4304	-0.27212	1.5795	-2.453	-2.8702	-9.0455	2.0816	7.118	4.4054	19.416	6.8658
12:47:12	-2.2846	6.3588	-1.0788	-22.644	-9.4707	-0.11173	0.84098	0.38134	-10.451	-10.634	2.4791	5.8709	4.2395	17.457	6.1468
12:47:13	-2.0874	6.1045	-1.0371	-6.5976	-12.123	-0.29668	1.1162	0.62507	-7.9196	-10.632	2.181	5.5145	4.4054	17.893	5.6675
12:47:14	-2.0145	5.6897	-1.4632	29.97	-13.429	-0.1379	1.7742	-0.63136	-2.7834	-13.095	2.33	7.2962	5.0692	20.287	6.9856
12:47:15	-1.5769	6.9481	-1.0179	34.849	-10.565	0.81482	2.084	-0.90876	-0.33915	-9.5127	1.6842	3.911	2.4141	16.586	5.7874
12:47:16	-1.487	7.4487	-0.70521	0.36659	-7.5961	0.53819	1.4865	0.91918	-6.327	-9.0743	1.5352	2.842	2.58	16.369	5.6675
12:47:17	-1.7272	6.5302	-0.902	-18.036	-7.0681	0.20424	0.96199	1.0033	-9.5864	-10.217	2.5784	6.4054	4.0736	17.24	6.3865
12:47:18	-1.7187	7.3605	-0.68893	41.723	-7.2758	-0.01346	2.2924	1.6315	0.72675	-10.021	1.7339	5.5145	3.4098	16.151	6.027
12:47:19	-2.439	5.7162	-1.9836	-6.8228	-9.441	-0.21161	1.0488	-2.8501	-9.2364	-11.4	2.7771	5.6927	5.5671	20.287	6.9856
12:47:20	-2.2547	5.0468	-1.8014	-20.661	-12.119	-0.47185	0.65878	-1.9908	-11.895	-12.019	2.032	7.6525	5.0692	20.287	7.1054
12:47:21	-1.2638	6.6347	-0.59011	11.647	-13.222	1.3076	1.5733	2.0034	-5.582	-12.828	2.2307	4.6237	3.2438	17.022	5.9072
12:47:22	-1.5213	7.0338	-0.57469	36.675	-13.939	0.6053	2.1445	1.8878	-2.7051	-13.261	1.6842	5.5145	4.0736	17.24	6.9856
12:47:23	-2.3789	4.9156	-2.0353	-14.046	-14.099	-0.12811	0.77288	-2.7408	-12.343	-15.603	2.6778	7.4744	5.733	20.505	8.9028
12:47:24	-2.4091	5.0279	-2.1341	-48.563	-12.276	-0.57171	0.10799	-3.1127	-18.529	-15.286	2.032	6.5835	6.2309	21.593	9.1424
12:47:25	-1.9202	5.8072	-1.1251	-25.473	-11.532	-0.12152	0.69957	0.72804	-13.944	-14.694	2.4294	6.049	5.0692	18.546	7.9442
12:47:26	-1.8086	5.8743	-1.1713	15.771	-13.171	0.26316	1.5325	1.0747	-7.5487	-16.29	1.9326	7.2962	5.0692	18.981	7.8244
12:47:27	-1.4782	5.478	-1.173	13.315	-15.866	1.1242	1.418	-0.58097	-8.8696	-16.064	1.9823	3.7329	2.58	19.199	7.9442
12:47:28	-2.3661	4.4924	-2.4506	-46.478	-18.111	-0.05281	0.06063	-3.5224	-19.38	-18.382	2.032	7.2962	6.3968	22.9	11.06
12:47:29	-2.1689	5.052	-1.6237	-41.869	-18.017	-0.23777	0.24905	-0.54099	-18.516	-17.363	2.7771	7.6525	6.3968	21.593	10.94
12:47:30	-2.1346	4.9478	-1.67	-5.2449	-18.271	-0.30488	0.96097	-0.19429	-13.051	-20.724	2.1313	6.4054	6.5628	21.811	10.58
12:47:31	-2.2846	4.739	-1.7897	1.4377	-17.897	-0.11173	1.0616	-0.68804	-13.104	-20.89	2.7771	8.187	6.8947	22.464	11.06
12:47:32	-2.4346	4.2968	-2.2638	-58.648	-19.904	0.08139	-0.20146	-3.2535	-25.326	-24.633	1.9823	7.118	7.5585	25.512	12.138
12:47:33	-1.7055	4.5326	-1.5358	-35.738	-21.242	0.86554	0.29573	-0.64395	-21.795	-25.405	2.1313	4.2674	6.8947	23.335	12.617
12:47:34	-2.1388	3.6865	-2.0073	-33.653	-25.605	0.20583	0.19443	-0.72584	-22.647	-26.471	2.2803	8.3652	8.5541	26.818	14.894
12:47:35	-2.3704	3.2447	-2.3501	-26.824	-26.787	-0.34582	0.2546	-1.4948	-21.845	-28.682	2.6778	7.8307	9.052	27.907	16.092
12:47:36	-2.7307	3.0999	-2.6682	-68.159	-24.5	-0.84674	-0.59181	-3.5602	-28.767	-26.125	2.6778	8.8997	9.218	27.689	16.092
12:47:37	-2.5805	3.3087	-2.4969	-74.864	-20.775	-0.23617	-0.69242	-3.1757	-28.845	-24.552	2.4791	8.8997	8.3882	26.818	15.493
12:47:38	-2.289	3.748	-2.2512	-38.161	-21.101	-0.40473	0.11387	-1.1229	-22.919	-26.46	2.7274	6.5835	7.8904	25.294	15.134
12:47:39	-1.4311	5.3791	-0.87572	28.427	-21.862	1.1324	1.7202	1.3625	-11.803	-26.207	1.3365	6.2272	5.899	22.9	13.216
12:47:40	-2.2632	3.4909	-2.3555	-45.452	-27.088	-0.25415	-0.06764	-1.7322	-26.421	-29.505	2.9261	7.4744	10.048	27.907	16.452
12:47:41	-2.722	2.018	-3.3691	-89.141	-27.739	-0.26074	-1.1903	-4.9826	-34.071	-29.078	2.6281	9.256	11.043	30.737	17.77
12:47:42	-2.7006	3.0061	-2.7716	-72.542	-23.772	-0.40315	-0.69934	-3.3417	-28.314	-24.687	2.7274	9.256	9.5498	27.471	16.572
12:47:43	-2.4862	4.1069	-1.8151	-24.165	-20.458	-0.2198	0.44995	-0.21948	-19.339	-24.112	2.5784	7.2962	7.8904	24.423	15.134
12:47:44	-2.1818	4.4738	-1.6746	-8.1745	-20.51	-0.31307	0.83304	0.39613	-17.137	-25.355	2.181	9.0778	7.7244	24.423	14.535
12:47:45	-1.3025	5.2584	-1.261	-5.7292	-18.54	1.0817	1.0149	-0.47801	-15.882	-23.239	2.1313	4.98	5.5671	22.247	13.576
12:47:46	-2.3233	3.3731	-2.6011	-56.135	-20.602	-0.33763	-0.31624	-3.785	-23.676	-22.131	2.2307	7.6525	8.5541	27.471	14.415
12:47:47	-2.572	3.8551	-2.2004	-51.233	-18.855	-0.45387	-0.14129	-2.06	-21.1	-19.437	2.6281	8.0089	7.8904	23.553	13.816
12:47:48	-2.3318	5.1779	-1.3581	-28.177	-18.095	-0.11992	0.54468	0.8058	-16.713	-19.228	2.4791	6.2272	6.2309	20.94	11.419
12:47:49	-2.2717	4.6907	-1.8314	-12.401	-17.829	-0.03644	0.77945	-0.93178	-15.763	-20.493	2.2803	8.5434	7.2266	22.682	11.539
12:47:50	-1.9071	3.8257	-2.0561	-37.902	-18.432	0.75749	0.12736	-2.8627	-21.405	-22.603	2.4294	6.4054	7.5585	23.988	12.737
12:47:51	-1.4826	4.7655	-1.698	-35.445	-17.674	0.8312	0.33619	-2.2093	-20.084	-21.931	2.181	5.8709	5.899	23.553	12.138
12:47:52	-2.6663	3.4479	-2.029	-79.405	-23.192	-0.47025	-0.7595	-1.6756	-29.314	-24.586	2.4294	7.6525	9.218	25.947	14.055
12:47:53	-2.6921	3.9971	-1.9402	-33.586	-24.655	-0.62085	0.24837	-0.95067	-22.252	-25.149	2.9261	8.3652	8.3882	25.077	14.774
12:47:54	-2.246	3.4294	-2.496	-40.606	-24.484	0.11416	0.01291	-2.3479	-24.174	-26.971	2.4294	7.8307	8.8861	25.947	15.014
12:47:55	-2.6534	2.3877	-3.2294	-50.061	-23.94	-0.39496	-0.35046	-5.1948	-27.285	-28.959	2.6778	8.3652	10.214	30.301	16.092
12:47:56	-1.4955	4.3157	-1.6292	-31.332	-21.431	0.7559	0.34933	-0.77842	-22.116	-26.98	1.8333	6.2272	7.0606	24.423	15.853
12:47:57	-1.7656	4.1576	-1.6492	-54.523	-25.104	0.78206	-0.13438	-0.07243	-27.293	-27.772	2.7771	6.2272	7.2266	24.206	16.332
12:47:58	-2.7477	3.1695	-2.3138	-70.841	-29.82	-0.41134	-0.62535	-1.4885	-31.404	-30.905	2.4791	8.5434	9.8817	28.56	16.931
12:47:59	-2.6405	2.9393	-2.7199	-47.908	-27.764	-0.31966	-0.20905	-3.4509	-27.742	-30.162	2.5784	9.256	10.048	28.777	17.77
12:48:00	-2.6449	2.3262	-3.1723	-45.666	-25.69	-0.61266	-0.2699	-5.0666	-27.672	-30.728	2.9758	8.187	10.214	29.866	17.65
12:48:01	-2.5934	2.3475	-2.8079	-62.118	-28.65	-0.31147	-0.58557	-3.348	-32.573	-34.404	2.8268	9.7905	10.38	30.737	18.129
12:48:02	-1.4396	4.1415	-1.2901	-59.684	-29.619	1.3501	-0.22842	1.4088	-31.383	-33.493	1.9823	5.6927	8.7201	26.165	16.572
12:48:03	-2.5632	2.5857	-2.6094	-82.819	-32.353	0.13213	-0.95485	-1.7763	-36.231	-33.968	2.8765	9.6123	10.214	30.083	18.848
12:48:04	-3.1423	2.0743	-3.0001	-73.5	-29.111	-0.84516	-0.86114	-3.8543	-33.91	-32.402	2.8765	8.3652	11.043	30.301	18.848
12:48:05	-2.632	1.9995	-3.2294	-50.545	-26.819	-0.53736	-0.41788	-5.1948	-30.116	-32.158	2.4791	10.147	11.375	31.825	19.807
12:48:06	-2.7263	1.7424	-3.1298	-57.521	-28.197	-0.55374	-0.5994	-3.9951	-31.774	-33.169	2.8765	8.5434	11.375	32.26	19.927
12:48:07	-2.6447	3.1321	-2.205	-59.538	-29.224	0.19105	-0.40371	-1.4696	-30.528	-31.65	2.9261	9.9687	9.8817	27.471	18.369
12:48:08	-1.894	4.6102	-1.4469	-36.504	-28.273	1.6365	0.30922	0.08093	-26.272	-30.791	1.7339	5.1582	8.2223	25.294	16.332
12:48:09	-2.4261	2.8295	-2.5223	-57.397	-27.908	-0.13631	-0.41063	-2.7071	-31.05	-32.887	2.4294	9.4342	10.048	31.39	17.89
12:48:10	-2.8464	1.3111	-3.3283	-92.262	-29.352	-0.72072	-1.3587	-5.5667	-39.276	-35.221	3.0752	8.5434	11.873	33.131	19.807
12:48:11	-2.7864	1.5469	-3.6239	-69.285	-32.458	-0.63723	-0.86148	-5.8545	-35.35	-35.991	2.8765	10.681	12.039	32.696	20.406
12:48:12	-2.7993	2.0691	-2.5894	-53.035	-32.089	-0.71253	-0.45142	-2.4823	-31.634	-34.77	2.5784	8.8997	11.375	31.172	19.567
12:48:13	-2.4776	4.0293	-1.6909	-24.785	-24.3	-0.4375	0.43646	-0.31616	-22.96	-28.713	2.4791	8.7215	7.7244	23.77	18.489
12:48:14	-1.654	4.4738	-1.4207	-8.5913	-22.892	1.1667	0.83304	0.44022	-19.573	-28.468	1.9326	5.3364	6.0649	23.335	15.733
12:48:15	-2.8593	1.8627	-2.7416	-89.558	-27.291	-0.79602	-1.2173	-4.4006	-36.507	-31.16	2.5784	9.6123	9.3839	29.43	17.77
12:48:16	-2.8678	1.8869	-3.3908	-82.538	-29.474	-0.57831	-1.0762	-5.9323	-34.585	-31.231	2.5287	8.3652	10.38	29.648	17.77
12:48:17	-2.915	1.6298	-3.6593	-89.964	-31.257	-0.5865	-1.2577	-5.033	-38.877	-36.014	3.0255	10.325	11.209	31.172	18.369
12:48:18	-3.048	1.903	-2.8533	-78.762	-32.671	-0.82878	-0.98216	-2.1734	-38.593	-39.114	3.0255	9.9687	11.707	30.954	19.567
12:48:19	-2.9921	1.67	-2.9521	-78.976	-36.644	-0.23458	-1.0226	-2.5453	-39.844	-41.192	2.7274	9.7905	11.873	31.607	19.807
12:48:20	-2.0743	2.428	-2.4434	-39.817	-37.213	0.58232	-0.11535	-1.6293	-32.597	-40.288	1.8333	7.6525	11.707	31.172	20.646
12:48:21	-2.8377	1.1345	-3.38	-76.565	-34.368	-0.13471	-1.07	-5.4574	-38.786	-40.102	2.5784	9.0778	12.537	34.002	23.641
12:48:22	-3.048	0.31496	-3.9258	-111.3	-35.482	-0.82878	-1.8967	-7.2076	-46.223	-41.916	3.2242	11.929	13.201	36.179	24.24
12:48:23	-3.1294	0.29887	-3.9612	-116.04	-38.669	-0.76986	-1.9907	-6.3861	-47.877	-43.163	3.2242	9.9687	13.699	37.05	23.761
12:48:24	-3.0779	1.1156	-3.2069	-104.23	-36.963	-0.46867	-1.6208	-3.4172	-44.037	-40.707	2.8765	11.394	12.703	32.913	23.282
12:48:25	-2.9879	2.634	-2.5477	-69.341	-30.853	-0.74529	-0.67271	-2.2386	-35.679	-36.947	2.4294	8.7215	10.38	28.342	22.563
12:48:26	-2.0184	3.2286	-2.0127	-32.503	-30.935	1.1765	0.16055	-0.96327	-28.963	-37.424	1.4359	7.2962	9.7158	27.907	19.567
12:48:27	-2.8377	1.7263	-3.3691	-62.738	-36.013	-0.13471	-0.69345	-4.9826	-36.194	-39.385	2.7274	9.9687	12.537	33.349	21.604
12:48:28	-3.1209	0.32581	-4.0192	-86.064	-36.587	-0.98756	-1.3929	-7.3421	-42.161	-41.799	3.1248	9.7905	14.694	35.526	23.042
12:48:29	-3.3438	-0.39194	-4.1534	-114	-37.96	-0.95321	-2.065	-6.8924	-48.992	-45.123	2.9758	11.929	14.694	37.92	23.162
12:48:30	-3.3866	0.04983	-3.8661	-121.29	-43.93	-0.6684	-2.1252	-4.5959	-39.077	-49.476	2.8765	10.325	15.026	37.267	23.881
12:48:31	-3.5668	-0.75082	-3.711	-128.56	-47.263	-0.91887	-2.4011	-4.9237	-41.606	-52.986	2.6281	12.463	16.354	38.791	26.397
12:48:32	-2.473	0.76758	-2.7799	-93.727	-41.704	0.65922	-1.4531	-1.333	-47.835	-50.092	2.0816	8.8997	12.869	37.05	25.918
12:48:33	-3.4423	0.29887	-3.2848	-116.38	-40.44	-0.45889	-1.9907	-3.6673	-49.852	-47.404	3.1745	10.503	14.528	38.356	27.356
12:48:34	-3.8629	-0.53115	-4.06	-109.4	-41.359	-1.847	-1.998	-6.7579	-48.193	-44.787	3.3732	11.216	14.528	39.227	28.434
12:48:35	-3.2709	-0.10547	-3.9775	-120.57	-36.958	-0.79443	-2.1522	-7.0983	-48.28	-42.558	3.2739	10.325	14.694	37.267	27.116
12:48:36	-3.3222	0.73819	-3.5042	-78.818	-33.789	-0.29191	-1.1844	-5.3608	-38.922	-39.539	2.7771	10.86	12.869	36.614	25.558
12:48:37	-2.679	2.0075	-2.6419	-48.641	-35.064	0.25815	-0.37085	-3.2009	-32.021	-38.064	2.4294	7.2962	11.375	32.26	22.443
12:48:38	-1.8641	3.0946	-1.728	-48.359	-32.43	1.2764	-0.18208	-1.1503	-30.375	-36.295	2.0816	7.4744	9.052	29.43	21.724
12:48:39	-2.5846	2.9446	-2.1099	-68.925	-28.126	0.27454	-0.61877	0.32054	-33.244	-34.159	2.8765	9.7905	10.38	30.301	22.683
12:48:40	-2.7606	2.6099	-2.4072	-75.585	-28.587	-0.48663	-0.81378	-1.623	-33.059	-32.157	2.9758	7.8307	9.7158	29.866	20.526
12:48:41	-3.1936	1.777	-2.8079	-92.015	-32.199	-0.34264	-1.2778	-3.348	-37.828	-34.944	2.7771	9.9687	10.877	32.696	20.166
12:48:42	-3.3609	1.2093	-3.4888	-99.26	-31.681	-0.51781	-1.5132	-5.4763	-41.066	-37.553	2.7771	9.9687	12.537	34.002	21.245
12:48:43	-2.4689	1.9351	-2.7362	-69.251	-32.235	0.1485	-0.79406	-4.1632	-35.153	-37.032	2.1313	7.2962	10.877	33.567	19.567
12:48:44	-2.4132	2.1412	-3.0009	-98.855	-32.337	-0.06101	-1.3514	-4.6822	-38.696	-34.813	2.5784	8.8997	10.877	33.131	21.604
12:48:45	-2.8849	2.1037	-2.8133	-87.192	-28.308	-0.1429	-1.1298	-3.5854	-35.713	-33.342	2.9758	8.7215	11.043	31.39	21.604
12:48:46	-3.2065	1.9432	-2.8642	-66.637	-29.412	-0.41794	-0.74704	-2.6483	-32.91	-33.688	2.6778	9.6123	11.375	32.913	21.005
12:48:47	-3.1122	2.3717	-2.3655	-54.963	-31.872	-0.40156	-0.44451	-1.3792	-29.861	-33.036	2.6281	9.6123	11.209	30.737	20.166
12:48:48	-3.0093	1.903	-2.6457	-78.323	-31.725	-0.60288	-0.98216	-1.7826	-36.025	-36.404	2.7274	8.8997	11.873	33.131	20.166
12:48:49	-1.9586	3.0974	-1.8297	-25.382	-31.835	0.45629	0.27466	0.72392	-26.449	-36.577	2.2307	7.118	9.7158	30.519	18.249
12:48:50	-2.9021	1.5227	-2.6557	-76.193	-36.747	-0.5112	-1.0026	-1.4296	-36.614	-38.973	2.9758	10.325	12.371	32.913	21.604
12:48:51	-3.2065	1.5682	-2.8216	-85.535	-33.502	-0.41794	-1.1772	-1.5767	-39.066	-38.332	2.6778	9.0778	12.039	33.784	22.563
12:48:52	-3.3266	1.3807	-2.9775	-94.775	-34.272	-0.58491	-1.3922	-2.0767	-40.926	-39.546	2.6281	10.325	12.869	34.002	22.323
12:48:53	-3.3825	1.0138	-3.0718	-111.04	-38.441	-1.1791	-1.7753	-3.0391	-44.708	-40.887	3.0255	10.86	13.533	35.526	23.641
12:48:54	-2.9836	1.4503	-3.176	-97.198	-34.837	-0.45229	-1.4258	-3.6484	-42.05	-40.03	2.9261	8.3652	12.703	34.655	22.802
12:48:55	-2.2842	1.5951	-2.865	-55.819	-36.135	1.4957	-0.57935	-3.4761	-34.864	-40.563	2.4294	7.8307	11.541	35.09	21.844
12:48:56	-3.3438	-0.00369	-3.759	-113.49	-38.923	-0.95321	-1.9976	-6.2327	-46.029	-41.356	3.0255	9.9687	15.026	39.009	25.079
12:48:57	-3.2495	0.42759	-3.9358	-78.807	-34.354	-0.93683	-1.2384	-6.8546	-38.856	-40.023	3.1248	10.503	14.03	39.009	25.319
12:48:58	-3.3995	0.31496	-4.0237	-110.98	-38.37	-0.7437	-1.8967	-6.7516	-44.379	-41.414	3.3732	11.216	14.362	38.791	23.881
12:48:59	-3.5668	0.23731	-3.8578	-111.3	-38.19	-0.91887	-1.9101	-6.6046	-46.223	-41.769	2.9758	9.7905	14.03	39.444	24.839
12:49:00	-3.1464	0.64445	-3.6447	-83.551	-35.937	-0.33445	-1.2919	-5.9764	-40.511	-42.226	2.5287	9.6123	13.035	37.05	24.24
12:49:01	-2.2671	1.8173	-2.4769	-80.903	-34.929	1.0603	-1.0427	-3.8817	-38.07	-36.806	2.2307	8.187	10.877	34.655	23.042
12:49:02	-3.0951	1.8708	-2.7616	-87.417	-30.705	-0.83697	-1.1702	-3.6947	-37.03	-35.61	3.1745	8.7215	11.707	32.696	23.521
12:49:03	-2.7905	2.286	-2.5848	-57.014	-25.46	-0.12652	-0.50501	-3.0727	-28.812	-28.914	3.1248	8.7215	10.048	30.954	21.005
12:49:04	-3.198	2.1146	-2.7299	-61.656	-29.637	-0.63564	-0.62603	-3.0979	-29.873	-32.185	2.6281	10.503	10.877	32.043	20.406
12:49:05	-3.1593	1.8736	-2.5685	-64.35	-29.009	-0.40975	-0.7135	-2.3604	-32.577	-34.621	2.5287	8.7215	12.039	32.696	18.369
12:49:06	-2.9663	1.7665	-2.2984	-50.849	-33.272	-0.08399	-0.45833	-1.6041	-31.893	-36.518	2.4791	8.187	12.205	31.607	19.088
12:49:07	-2.3573	2.2003	-2.1216	-59.932	-34.344	0.53318	-0.56552	-0.98217	-32.832	-38.556	2.2307	8.7215	11.707	33.349	20.406
12:49:08	-2.9534	2.2192	-2.3501	-32.413	-31.285	-0.00869	-0.01474	-1.4948	-28.437	-35.71	2.8268	9.7905	12.039	31.825	20.765
12:49:09	-3.065	1.6378	-2.6928	-87.631	-34.458	-0.39337	-1.2107	-2.2638	-38.28	-37.341	2.6778	8.8997	13.035	33.567	22.683
12:49:10	-3.1508	2.3314	-2.4289	-66.536	-29.424	-0.62745	-0.67962	-2.5727	-32.318	-34.23	2.7274	9.7905	11.375	32.26	20.646
12:49:11	-3.3052	2.8054	-2.1687	-64.079	-25.969	-0.72732	-0.55169	-1.4633	-30.997	-29.542	2.8765	10.147	10.38	29.213	20.046
12:49:12	-2.9707	2.6742	-2.1324	-57.318	-31.344	-0.37699	-0.43759	-1.457	-30.589	-34.178	2.6281	8.0089	9.8817	30.083	18.009
12:49:13	-2.1857	3.2073	-1.9456	-16.231	-29.616	1.0014	0.47623	-1.1881	-25.115	-34.881	2.181	5.6927	7.2266	28.124	17.77
12:49:14	-2.9578	2.3234	-2.4443	-68.947	-30.213	-0.30169	-0.72664	-2.4571	-33.375	-33.673	2.7771	9.9687	11.707	31.39	19.567
12:49:15	-3.2323	1.3031	-2.8541	-94.64	-35.393	-0.56853	-1.4057	-3.0013	-40.136	-39.046	2.7771	11.038	13.035	33.349	19.807
12:49:16	-3.3652	1.3111	-2.9121	-92.488	-33.448	-0.81081	-1.3587	-3.9573	-40.593	-38.014	2.8765	10.325	13.533	34.22	21.604
12:49:17	-3.6011	0.37127	-3.2694	-95.079	-38.395	-0.85176	-1.5675	-3.7828	-42.704	-42.499	2.8765	10.325	14.694	35.526	21.964
12:49:18	-3.3137	1.3514	-2.8287	-81.174	-36.893	-0.50962	-1.1236	-3.4698	-39.651	-41.235	2.7274	9.4342	12.703	33.784	23.521
12:49:19	-2.3442	2.7491	-1.8105	-80.993	-33.157	1.4122	-0.88086	-0.80991	-38.597	-38.195	2.032	7.8307	9.218	30.301	20.885
12:49:20	-3.4037	0.58534	-3.0826	-122.76	-39.923	-0.23299	-2.0778	-3.5139	-48.021	-44.384	2.9758	10.325	13.201	36.832	24.72
12:49:21	-3.408	1.046	-2.9167	-101.85	-36.011	-0.526	-1.5872	-3.3669	-43.177	-40.311	3.0752	9.6123	13.035	35.961	23.282
12:49:22	-3.1722	1.903	-2.6774	-78.706	-34.202	-0.48505	-0.98216	-2.3793	-38.264	-40.074	2.8765	9.6123	11.873	33.349	23.881
12:49:23	-3.2879	1.3111	-2.9421	-92.679	-38.562	-0.35902	-1.3587	-2.8983	-41.712	-42.065	2.9261	10.681	14.03	36.179	22.922
12:49:24	-2.8034	2.6581	-2.3918	-62.276	-30.871	-0.20182	-0.53164	-1.7385	-33.494	-35.638	2.4791	9.256	11.541	29.43	22.683
12:49:25	-2.4602	2.3314	-2.0707	-66.896	-33.156	0.73451	-0.67962	-1.9193	-34.424	-38.658	2.032	6.2272	10.38	28.777	19.447
12:49:26	-3.3395	1.5308	-2.9475	-74.153	-35.727	-0.66021	-0.95553	-3.1357	-37.729	-38.179	2.6778	9.9687	12.205	33.567	22.683
12:49:27	-3.2279	2.0985	-2.6202	-67.031	-32.05	-0.27553	-0.72007	-2.2512	-35.214	-38.774	2.5784	9.256	10.711	30.954	21.364
12:49:28	-3.3951	1.2978	-3.1135	-74.063	-37.282	-0.4507	-0.99598	-3.2828	-37.202	-40.223	2.6281	10.681	12.039	34.002	22.922
12:49:29	-3.5539	0.98723	-3.3945	-74.142	-34.837	-0.84357	-1.0499	-4.514	-37.663	-40.03	2.9261	10.86	13.533	34.002	22.083
12:49:30	-3.2707	1.2202	-2.9847	-73.984	-32.921	0.00928	-1.0095	-3.9699	-36.741	-38.694	2.6778	8.8997	12.869	34.22	23.761
12:49:31	-2.353	2.7253	-2.466	-21.077	-34.969	0.82618	0.30128	-3.4068	-27.362	-37.507	1.7339	7.118	10.546	30.083	19.567
12:49:32	-3.1978	1.1908	-3.5459	-60.18	-32.683	0.16807	-0.74081	-5.6045	-34.28	-39.656	3.1248	9.7905	12.703	34.437	23.042
12:49:33	-3.6224	0.50524	-3.8469	-78.751	-35.435	-0.70935	-1.2249	-6.1297	-38.527	-38.822	2.9758	11.394	12.703	35.961	21.604
12:49:34	-3.6482	0.07676	-4.2322	-90.358	-36.382	-0.85995	-1.5274	-7.9703	-41.181	-41.069	2.8765	11.394	13.865	36.397	23.881
12:49:35	-3.5668	0.4811	-3.9049	-85.726	-33.293	-0.91887	-1.3659	-7.0857	-40.186	-38.99	2.8765	10.325	13.367	35.09	21.484
12:49:36	-3.3951	0.34994	-3.962	-79.168	-39.967	-0.4507	-1.2518	-7.2139	-40.963	-43.697	2.5287	9.4342	14.528	37.05	22.922
12:49:37	-2.889	1.6245	-2.903	-69.522	-34.052	0.3678	-0.848	-5.1381	-36.733	-39.199	2.2803	7.2962	12.371	33.131	20.406
12:49:38	-3.6869	1.081	-3.3137	-68.857	-28.641	-1.0858	-0.94239	-6.5101	-32.848	-32.475	2.6778	9.7905	11.541	32.913	24.48
12:49:39	-3.6825	1.0194	-3.8169	-64.304	-31.565	-0.79284	-0.86183	-7.1887	-32.313	-34.525	2.5784	10.503	11.375	34.437	21.364
12:49:40	-3.3951	2.053	-3.0009	-57.307	-26.958	-0.4507	-0.54547	-4.6822	-30.523	-31.565	2.7771	9.4342	10.38	30.519	20.406
12:49:41	-3.6096	1.0407	-3.5459	-80.779	-33.71	-0.63405	-1.1775	-5.6045	-37.346	-38.137	3.1745	9.9687	12.869	32.696	20.406
12:49:42	-3.2021	1.5094	-2.9792	-58.027	-35.309	-0.12494	-0.63985	-3.7324	-34.737	-39.494	2.5287	8.7215	13.865	33.349	19.927
12:49:43	-3.0006	2.0799	-2.7879	-28.323	-35.318	-0.01688	0.05234	-4.0539	-30.601	-40.962	2.2803	8.5434	12.039	32.696	20.885
12:49:44	-3.7211	0.6525	-3.2486	-81.084	-38.19	-1.0187	-1.2449	-3.661	-39.124	-41.769	3.1248	11.394	12.703	36.397	23.761
12:49:45	-3.4423	1.1667	-2.7708	-67.099	-34.029	-0.45889	-0.88188	-2.5138	-35.609	-37.652	3.0752	11.216	12.703	36.397	24.72
12:49:46	-3.4294	0.86936	-2.807	-85.771	-35.869	-0.38359	-1.2985	-2.5201	-40.449	-41.828	3.1248	11.038	13.533	36.179	23.401
12:49:47	-3.5366	0.99248	-2.9584	-95.023	-38.661	-0.47527	-1.4596	-3.6106	-42.375	-41.233	3.0255	9.9687	14.03	34.873	24.72
12:49:48	-2.8418	1.5791	-2.1787	-60.506	-35.137	0.37599	-0.67339	-1.1103	-36.189	-41.778	2.2803	8.187	12.703	34.22	21.844
12:49:49	-3.1722	1.8414	-2.1741	-74.119	-35.848	-0.48505	-0.90159	-1.7007	-37.531	-39.357	2.181	8.8997	11.209	33.131	24.12
12:49:50	-3.6611	1.4825	-2.6674	-87.586	-34.331	-0.93525	-1.2377	-2.7323	-38.017	-38.476	2.9758	10.681	12.039	33.784	23.042
12:49:51	-3.5238	2.0502	-2.584	-80.464	-29.162	-0.39997	-1.0022	-2.2449	-35.503	-34.108	2.4791	10.147	11.375	32.478	23.162
12:49:52	-3.5838	1.5923	-2.9847	-78.255	-33.686	-0.48346	-1.0361	-3.9699	-35.63	-36.59	2.7771	9.7905	13.035	33.349	21.364
12:49:53	-3.4423	1.2737	-3.0626	-80.656	-32.65	-0.45889	-1.1371	-4.2199	-36.622	-36.642	2.4791	9.4342	13.533	35.526	21.724
12:49:54	-2.7475	2.187	-3.2711	-41.699	-32.632	0.39237	-0.20283	-5.4385	-30.56	-38.412	1.9326	7.118	10.214	32.913	20.526
12:49:55	-3.4982	0.63641	-3.7861	-85.647	-37.93	-1.0531	-1.339	-7.4198	-39.725	-40.721	2.7274	10.147	12.371	37.267	23.401
12:49:56	-3.8412	-8.88E-04	-4.1488	-90.527	-37.493	-1.1857	-1.5409	-7.4828	-42.169	-43.808	2.9261	11.216	15.026	38.791	24.12
12:49:57	-3.9956	-0.31953	-3.9203	-93.04	-39.967	-1.2856	-1.6418	-6.9702	-43.819	-43.697	3.3732	12.107	16.52	40.315	24.48
12:49:58	-3.9912	-0.42936	-4.1951	-102.2	-40.722	-0.99258	-1.8434	-7.1361	-45.218	-45.294	3.2242	10.681	17.018	39.662	26.157
12:49:59	-3.6652	0.13028	-3.4471	-97.75	-39.354	-0.42454	-1.655	-5.2326	-45.276	-45.288	2.8765	10.325	14.86	39.662	25.918
12:50:00	-3.1462	0.52658	-3.0472	-95.598	-43.709	0.46926	-1.5405	-4.3355	-45.733	-49.129	2.6281	9.6123	13.035	39.009	25.678
12:50:01	-3.6224	0.44613	-3.1298	-118.27	-39.551	-0.70935	-2.0108	-3.9951	-47.881	-44.088	3.1745	11.038	13.533	36.614	26.517
12:50:02	-3.6611	0.47026	-3.1343	-111.44	-37.887	-0.93525	-1.8697	-3.4046	-47.078	-46.575	2.8268	11.572	14.694	37.267	26.996
12:50:03	-3.7812	-0.04391	-3.6384	-125.6	-44.058	-1.1022	-2.2327	-4.9111	-46.492	-47.878	2.5287	11.216	16.188	38.791	25.438
12:50:04	-3.9655	-1.2891	-3.8307	-149.16	-47.575	-0.84198	-2.9052	-5.4174	-46.796	-55.277	3.2242	12.285	18.345	43.363	27.715
12:50:05	-3.4207	-1.7281	-3.5913	-119.8	-50.166	0.20241	-2.3883	-4.4299	-47.062	-57.269	2.8268	11.75	17.018	44.669	28.194
12:50:06	-3.4336	-1.3559	-3.39	-124.11	-51.261	0.12712	-2.4149	-5.1044	-46.857	-56.148	2.5784	11.038	16.354	44.016	31.669
12:50:07	-3.957	-0.41607	-3.535	-120.7	-39.227	-1.0597	-2.2061	-5.1296	-49.07	-46.423	3.2242	12.107	16.686	40.75	31.909
12:50:08	-3.9312	-0.42132	-3.5251	-99.993	-38.35	-0.90909	-1.7964	-5.4826	-45.346	-43.648	3.1745	11.572	16.354	39.444	28.674
12:50:09	-3.9526	-0.70778	-4.1334	-92.972	-41.437	-0.76668	-1.7093	-7.5984	-43.424	-46.652	3.0255	11.75	16.188	40.968	27.595
12:50:10	-3.6011	0.07397	-3.7807	-113.7	-36.653	-0.85176	-1.9841	-7.1824	-47.214	-43.122	3.0752	10.325	13.699	37.703	24.839
12:50:11	-3.082	1.322	-3.1832	-66.953	-32.373	0.04204	-0.85491	-5.5415	-34.754	-36.902	2.4294	7.4744	11.043	34.437	23.162
12:50:12	-3.5325	0.79976	-3.729	-82.999	-34.609	-0.98597	-1.265	-7.2917	-37.285	-37.753	2.9261	9.6123	13.035	35.961	22.203
12:50:13	-3.7297	0.7354	-3.4479	-101.5	-31.616	-0.80103	-1.6412	-6.0604	-41.136	-35.768	2.7771	10.325	13.865	34.655	22.922
12:50:14	-3.4637	1.1478	-3.1877	-94.584	-34.41	-0.31648	-1.4327	-4.9511	-39.807	-39.878	2.9261	10.503	12.371	35.308	21.604
12:50:15	-3.7209	0.51049	-3.3066	-99.632	-39.844	-0.21503	-1.6346	-4.617	-43.239	-42.982	2.8765	11.572	12.703	37.703	22.083
12:50:16	-3.4895	1.081	-2.9121	-69.938	-37.632	-0.46708	-0.94239	-3.9573	-39.169	-43.677	2.7771	10.147	12.371	35.526	23.282
12:50:17	-2.7218	2.6903	-2.2367	-53.43	-36.472	0.54297	-0.34355	-2.0663	-33.938	-43.476	1.9326	7.6525	12.039	30.519	21.245
12:50:18	-3.6524	0.35518	-2.9484	-99.643	-38.37	-0.34924	-1.6615	-3.9636	-43.305	-41.414	2.8268	10.325	13.367	35.744	25.199
12:50:19	-3.5065	1.3755	-2.6882	-73.962	-32.948	-0.03167	-0.9825	-2.8542	-36.61	-38.853	3.1248	9.7905	12.039	34.873	23.521
12:50:20	-3.558	0.95505	-2.8696	-83.247	-36.489	-0.33286	-1.238	-2.8857	-38.733	-42.168	3.0255	10.503	13.201	35.09	24.6
12:50:21	-3.7039	0.16771	-3.3845	-109.01	-40.439	-0.65043	-1.8766	-4.867	-45.889	-42.699	2.8268	11.216	14.694	37.703	23.881
12:50:22	-3.5109	0.68993	-3.4471	-92.747	-36.677	-0.32467	-1.4665	-5.2326	-42.107	-44.206	2.6281	10.681	14.362	37.05	24.12
12:50:23	-2.7558	0.73015	-3.1732	-81.433	-38.595	1.4138	-1.2314	-5.8945	-41.165	-45.079	2.3797	8.187	12.537	37.05	24.001
12:50:24	-3.8369	-0.40523	-4.3682	-95.316	-41.403	-0.89271	-1.7023	-9.1763	-44.087	-43.638	2.8765	11.038	14.196	40.75	25.079
12:50:25	-3.8155	-0.02502	-4.0508	-97.378	-36.264	-1.0351	-1.6819	-7.9388	-43.103	-43.671	3.1745	10.681	14.528	37.05	26.397
12:50:26	-3.8155	0.3419	-3.9049	-81.072	-36.574	-1.0351	-1.2989	-7.0857	-39.058	-41.719	3.1745	10.681	15.192	36.832	23.761
12:50:27	-3.824	0.27754	-3.8995	-99.565	-39.503	-0.81741	-1.675	-6.8483	-42.844	-41.457	3.1745	11.038	14.86	36.397	23.761
12:50:28	-3.3521	1.2737	-2.8233	-81.399	-39.007	0.0682	-1.1371	-3.2324	-40.967	-46.076	2.6281	9.7905	11.541	35.09	22.443
12:50:29	-2.9019	1.1691	-2.7036	-111.45	-40.157	0.2925	-1.7483	-2.7386	-47.144	-44.81	2.5287	9.0778	10.546	34.655	21.964
12:50:30	-3.9227	-0.07329	-3.6076	-111.73	-45.49	-1.1268	-1.9641	-5.1422	-48.79	-49.67	3.1248	11.75	15.856	38.356	26.517
12:50:31	-3.7425	0.58814	-3.1298	-99.993	-40.597	-0.87633	-1.6211	-3.9951	-45.346	-45.503	2.9758	11.038	15.524	35.961	24.959
12:50:32	-3.5238	2.5483	-2.7245	-71.584	-32.424	-0.39997	-0.73322	-2.8605	-35.749	-38.608	2.9758	10.147	11.541	32.913	25.438
12:50:33	-3.6696	1.5147	-2.9584	-78.593	-36.096	-0.71754	-1.0496	-3.6106	-37.605	-39.4	2.9261	9.7905	11.375	33.349	23.641
12:50:34	-3.8454	0.57764	-3.3283	-58.14	-35.421	-0.675	-0.80166	-5.5667	-35.395	-38.743	2.5287	10.681	16.188	34.873	23.641
12:50:35	-3.8583	-0.16424	-4.128	-92.927	-39.857	-0.7503	-1.6149	-7.361	-43.161	-43.524	3.87	11.038	13.533	37.92	23.042
12:50:36	-4.15	-0.73473	-4.6221	-123.07	-43.066	-1.3855	-2.3071	-9.2204	-49.864	-46.781	3.6216	11.75	15.358	39.88	25.079
12:50:37	-4.1843	-1.3507	-4.5958	-144.18	-43.763	-1.3183	-2.8247	-8.8611	-41.506	-49.91	3.2242	12.641	17.515	41.621	25.798
12:50:38	-3.9784	-0.64903	-4.4244	-121.19	-43.654	-0.91728	-2.2466	-8.4766	-42.482	-49.274	3.3235	12.107	16.686	40.75	26.757
12:50:39	-3.0475	1.2604	-3.3908	-62.974	-40.736	0.77864	-0.77435	-5.9323	-37.576	-45.373	2.2803	8.7215	11.209	34.873	26.637
12:50:40	-3.2449	1.2282	-3.2349	-72.204	-37.663	0.15988	-0.96244	-5.4322	-39.37	-42.449	2.9261	9.0778	11.541	35.526	24.48
12:50:41	-3.9998	-0.27406	-3.8932	-102.52	-41.141	-0.77487	-1.8164	-5.783	-47.062	-48.683	3.0752	11.394	15.69	38.138	26.038
12:50:42	-4.2057	-0.85784	-3.8724	-114.45	-47.764	-1.1759	-2.1459	-5.6612	-41.623	-51.684	3.1745	12.107	17.349	40.75	26.996
12:50:43	-4.1928	-1.265	-3.6076	-142.23	-48.259	-1.1006	-2.7642	-5.1422	-41.408	-52.696	3.2242	12.285	15.69	41.186	27.835
12:50:44	-3.8539	-0.32233	-3.2803	-116.56	-42.985	-0.4573	-2.0986	-4.2577	-42.366	-51.472	3.2739	11.75	14.03	37.92	29.513
12:50:45	-2.8589	0.60423	-2.8541	-96.127	-46.119	0.8114	-1.5271	-3.0013	-48.827	-51.939	2.9261	9.6123	14.196	39.444	26.397
12:50:46	-4.0255	-0.90331	-3.9349	-105.68	-51.217	-0.92547	-1.9713	-6.0268	-43.556	-56.835	3.1248	12.285	18.843	42.71	30.591
12:50:47	-3.7982	0.16246	-3.2857	-88.78	-42.095	-0.66681	-1.4669	-4.4951	-44.996	-48.617	3.0255	11.929	14.528	39.227	29.992
12:50:48	-3.7596	1.0275	-3.1089	-62.749	-35.403	-0.44092	-0.8148	-3.8732	-36.259	-40.513	3.2242	10.503	13.201	35.526	28.194
12:50:49	-3.9225	-0.70778	-3.9874	-93.028	-41.785	-0.32308	-1.7093	-6.7453	-43.753	-45.401	3.2242	11.038	16.354	40.75	28.075
12:50:50	-3.6008	-0.47484	-3.8478	-93.186	-42.973	-0.04805	-1.6688	-6.9576	-44.675	-45.762	2.5287	9.7905	15.69	39.227	25.199
12:50:51	-3.3434	-0.10268	-3.8015	-97.784	-40.567	0.6542	-1.6954	-7.3043	-45.473	-46.27	2.4294	10.325	13.533	39.227	26.157
12:50:52	-4.107	-0.41327	-3.7961	-97.356	-37.787	-0.86655	-1.7494	-7.0668	-42.972	-42.701	3.0752	11.929	14.03	39.444	25.798
12:50:53	-3.8369	0.06872	-4.1034	-92.972	-42.369	-0.89271	-1.5744	-8.6574	-43.424	-44.114	3.1248	11.394	15.358	39.227	26.876
12:50:54	-4.0856	-0.67037	-3.962	-104.95	-45.293	-1.009	-1.9309	-7.2139	-48.251	-50.87	3.4726	11.75	17.681	40.968	26.637
12:50:55	-4.0598	-0.63819	-3.5667	-95.947	-44.59	-0.85836	-1.7428	-5.7263	-47.773	-50.516	3.2739	11.929	16.52	41.839	26.277
12:50:56	-3.189	0.02325	-2.5485	-84.509	-46.368	0.75407	-1.3998	-3.0664	-46.107	-51.982	2.7274	9.4342	13.035	38.356	28.434
12:50:57	-3.6524	-0.23664	-3.2903	-114.39	-48.949	-0.34924	-2.0381	-3.9047	-46.389	-52.97	2.6778	10.681	16.52	38.791	28.554
12:50:58	-4.034	-0.07329	-3.3111	-111.91	-44.205	-0.70776	-1.9641	-4.0266	-49.844	-49.678	3.0752	11.929	18.179	41.621	31.07
12:50:59	-3.9655	0.30972	-3.0155	-91	-40.948	-0.84198	-1.4869	-3.7387	-44.934	-48.495	2.7274	11.929	15.524	38.138	29.513
12:51:00	-3.7982	1.2069	-2.7662	-55.672	-37.738	-0.66681	-0.64676	-3.1042	-34.009	-40.071	2.7771	10.503	11.375	33.784	26.517
12:51:01	-4.0469	-0.20166	-3.5396	-81.703	-44.304	-0.78306	-1.3932	-4.5392	-42.745	-48.847	3.5222	11.929	15.856	38.791	26.637
12:51:02	-3.0346	0.18939	-2.9747	-59.075	-43.789	0.85394	-0.86908	-4.3229	-40.86	-50.531	2.2307	9.0778	15.192	38.574	24.48
12:51:03	-4.1155	-1.3934	-3.8161	-112.39	-47.121	-0.64885	-2.1933	-6.3609	-40.637	-54.504	3.3235	11.394	16.852	42.927	27.715
12:51:04	-4.3214	-1.2702	-4.575	-121.14	-47.229	-1.0499	-2.3544	-8.7393	-39.562	-50.434	3.1248	11.75	15.524	42.927	30.711
12:51:05	-4.3472	-1.5969	-4.7	-126.15	-48.738	-1.2005	-2.5024	-9.4704	-40.951	-54.09	3.1745	11.75	16.852	43.798	28.913
12:51:06	-4.3472	-1.9691	-4.6484	-121.67	-47.311	-1.2005	-2.4758	-9.5797	-40.502	-55.617	3.0255	12.819	18.677	44.669	31.43
12:51:07	-3.991	-0.50422	-4.1388	-79.562	-44.113	-0.18887	-1.4002	-7.8358	-43.267	-48.196	2.8268	11.929	16.686	42.274	29.513
12:51:08	-2.9873	-0.19081	-3.4117	-56.776	-47.321	1.6658	-0.88947	-6.0541	-40.46	-51.916	2.181	9.4342	13.533	40.533	26.996
12:51:09	-3.9998	-0.54444	-4.0708	-91.766	-48.46	-0.77487	-1.6353	-7.2328	-49.411	-54.813	3.0255	12.107	16.52	42.71	29.872
12:51:10	-4.3428	-1.1069	-3.8732	-119.19	-46.401	-0.9075	-2.2804	-6.489	-43.41	-54.996	3.1745	12.285	18.677	42.492	28.913
12:51:11	-4.4714	-1.273	-3.8107	-144.62	-50.201	-0.85677	-2.8112	-6.1234	-44.137	-54.653	3.2242	12.463	18.013	43.145	30.95
12:51:12	-4.3428	-0.99181	-3.5096	-130.78	-49.8	-0.9075	-2.4886	-5.5982	-44.355	-54.661	3.0752	12.285	15.358	40.75	30.591
12:51:13	-3.8367	-0.83371	-3.1506	-107.99	-47.364	-0.089	-2.0049	-4.1169	-45.328	-56.397	2.6281	11.75	14.362	40.315	27.835
12:51:14	-3.6436	-1.0345	-3.0781	-98.843	-49.355	0.23676	-1.8572	-4.1043	-44.308	-55.817	3.0752	11.572	17.847	43.798	29.153
12:51:15	-4.5959	-2.3038	-4.0183	-129.08	-55.268	-1.3168	-2.6708	-6.5142	-44.532	-60.778	3.3235	14.245	20.336	46.846	31.43
12:51:16	-4.6301	-3.5599	-4.4336	-178.31	-62.413	-1.2496	-3.847	-7.2958	-44.631	-70.117	3.5719	14.779	20.668	50.329	32.748
12:51:17	-4.8015	-3.2521	-4.8643	-201.73	-62.064	-0.9141	-4.2498	-7.9618	-44.7	-71.368	3.6713	14.957	21	51.635	36.942
12:51:18	-4.9216	-5.0622	-5.5769	-208.62	-63.618	-1.0811	-4.701	-10.687	-44.543	-73.875	3.5719	15.314	24.153	54.465	38.02
12:51:19	-5.0288	-6.3903	-5.536	-211.42	-70.532	-1.1728	-4.9773	-11.271	-44.601	-76.695	3.8203	15.136	25.647	57.948	40.297
12:51:20	-4.2485	-3.6882	-4.8306	-148.27	-57.922	-0.89112	-3.2762	-10.439	-44.619	-65.481	3.2242	13.176	20.336	51.417	40.297
12:51:21	-4.8232	-3.2626	-4.9185	-159.31	-52.558	-1.5754	-3.4304	-10.336	-44.615	-61.85	3.4726	14.245	19.507	47.717	38.379
12:51:22	-4.7245	-3.1688	-4.924	-154.57	-53.102	-1.266	-3.3229	-10.574	-44.594	-59.862	3.5719	14.601	21.166	49.24	37.061
12:51:23	-4.7459	-2.1031	-4.6121	-137.59	-48.672	-1.1236	-2.8184	-9.5734	-44.607	-53.23	3.8203	11.572	19.341	44.234	33.826
12:51:24	-4.5528	-2.9681	-4.8768	-163.45	-50.662	-0.79785	-3.4705	-10.092	-44.609	-57.818	3.1745	13.888	21	47.717	32.508
12:51:25	-4.0253	-2.0628	-3.8069	-126.67	-49.282	-0.12176	-2.5833	-7.5417	-44.607	-57.27	2.9261	12.641	17.018	44.887	31.43
12:51:26	-4.0511	-1.5941	-3.7027	-103.72	-50.169	-0.27236	-2.0457	-6.9324	-44.604	-56.344	3.1248	12.285	17.018	42.71	31.31
12:51:27	-4.8275	-2.4913	-4.1334	-138.08	-53.12	-1.8684	-2.8858	-7.5984	-44.607	-58.091	3.8203	13.888	20.668	45.757	33.227
12:51:28	-4.7417	-2.336	-3.7744	-138.52	-53.621	-1.6343	-2.8589	-6.1171	-44.607	-61.957	3.6713	13.888	20.668	47.064	32.748
12:51:29	-4.4972	-1.1016	-3.4688	-139.91	-44.791	-1.0074	-2.6902	-6.1823	-44.606	-52.634	3.3732	13.354	17.183	44.234	32.388
12:51:30	-4.3469	-1.8327	-3.8315	-149.21	-47.468	-0.39679	-2.9996	-6.2453	-44.606	-53.716	3.1745	12.641	17.018	42.927	32.868
12:51:31	-3.7766	-0.7641	-2.9438	-110.09	-49.567	-0.00551	-2.0384	-4.554	-44.606	-54.234	2.3797	10.503	17.349	42.492	29.632
12:51:32	-4.4544	-0.89527	-3.2711	-103.31	-48.54	-1.2922	-1.9243	-5.4385	-44.606	-55.753	3.2739	12.285	18.013	43.145	30.711
12:51:33	-4.4799	-1.0586	-3.623	-105.86	-49.82	-0.63907	-1.9983	-5.0267	-44.606	-57.595	3.5719	13.532	17.018	45.54	32.508
12:51:34	-4.4972	-2.4056	-4.1797	-136.49	-55.69	-1.0074	-2.8253	-7.2517	-44.606	-63.242	3.4726	14.423	20.005	49.458	32.508
12:51:35	-4.9861	-4.2829	-4.5595	-184.96	-60.433	-1.4576	-4.1095	-8.8548	-44.606	-66.534	3.5222	14.779	23.821	52.506	35.743
12:51:36	-4.793	-4.1839	-4.6692	-200.97	-58.087	-1.1318	-4.4117	-9.7016	-44.606	-65.51	3.7706	14.245	22.494	52.724	37.9
12:51:37	-3.9181	-2.3734	-3.8178	-126.95	-51.65	-0.03008	-2.6373	-8.0166	-44.606	-60.304	2.9758	10.86	16.52	48.37	35.144
12:51:38	-4.6428	-2.81	-4.4778	-140.71	-53.587	-0.52123	-2.9868	-10.023	-44.606	-59.406	3.3235	13.532	21.664	50.547	37.061
12:51:39	-4.866	-3.2384	-4.7426	-152.23	-56.98	-1.2906	-3.2893	-10.542	-44.606	-61.384	3.9693	14.423	23.324	52.071	37.78
12:51:40	-4.7845	-2.585	-4.291	-142.97	-52.686	-1.3495	-2.9934	-9.7541	-44.606	-60.252	3.7706	14.245	20.668	50.329	35.863
12:51:41	-4.7203	-2.478	-3.8232	-156.39	-48.566	-1.7767	-3.2485	-8.254	-44.606	-56.375	3.7209	13.888	18.511	49.24	34.905
12:51:42	-4.0768	-1.7228	-3.3291	-140.39	-50.996	-0.42295	-2.798	-6.3945	-44.606	-56.951	2.8268	11.75	18.511	46.41	33.706
12:51:43	-3.7722	-0.16704	-2.6128	-116.99	-49.029	0.28749	-2.0716	-5.0877	-44.606	-53.909	3.1745	10.503	19.507	43.363	32.268
12:51:44	-4.1456	0.2534	-3.1452	-107.54	-45.233	-1.0924	-1.8161	-3.8795	-44.606	-52.865	3.4229	11.394	15.524	42.274	30.591
12:51:45	-4.1969	-0.54724	-3.0164	-114.82	-46.581	-0.58993	-2.092	-4.5666	-44.606	-55.104	3.5222	11.929	16.354	43.363	30.831
12:51:46	-4.39	-1.5889	-3.2032	-123.88	-48.079	-0.91569	-2.4554	-4.8355	-44.606	-52.588	3.5719	12.463	20.005	44.887	31.669
12:51:47	-4.4972	-1.2702	-3.126	-121.49	-47.28	-1.0074	-2.3544	-5.4133	-44.606	-51.678	3.2739	12.641	19.175	44.669	30.711
12:51:48	-3.2877	0.86132	-1.5512	-88.701	-40.371	0.44469	-1.3455	-0.5284	-44.535	-47.47	2.5287	9.6123	12.371	39.662	28.314
12:51:49	-4.1585	0.5668	-2.8867	-83.754	-37.01	-1.1677	-1.3054	-4.4258	-41.696	-43.801	3.1248	12.107	16.188	41.621	29.632
12:51:50	-4.0083	1.6326	-2.9655	-66.626	-31.278	-0.55717	-0.80098	-5.5037	-32.844	-33.318	2.8765	9.9687	14.03	35.961	27.356
12:51:51	-3.7853	1.6861	-2.9918	-73.207	-27.804	-0.59152	-0.92856	-5.863	-32.198	-30.401	2.9261	9.256	9.7158	32.696	22.563
12:51:52	-4.1456	0.564	-3.4125	-106.02	-30.607	-1.0924	-1.7622	-6.882	-41.474	-35.978	3.1745	9.9687	12.869	36.614	20.646
12:51:53	-3.6353	0.52658	-3.4896	-94.933	-34.741	-0.78465	-1.5405	-6.3042	-41.848	-39.936	2.8268	8.7215	15.192	37.267	21.005
12:51:54	-3.3519	2.2164	-2.5194	-55.774	-36.316	0.87191	-0.47147	-4.9533	-34.601	-39.747	2.5287	8.0089	11.707	34.002	20.646
12:51:55	-3.7639	2.6662	-1.9365	-59.797	-28.61	-0.73392	-0.48462	-2.3689	-32.042	-33.703	2.8268	9.256	9.052	30.083	21.005
12:51:56	-3.5794	2.4546	-2.1904	-75.844	-27.231	-0.19046	-0.84075	-2.413	-34.573	-33.155	2.6281	9.0778	12.039	29.866	20.646
12:51:57	-4.0299	1.5332	-2.3409	-116.93	-28.107	-1.2185	-1.822	-2.6756	-40.046	-30.762	3.1248	10.147	12.039	31.172	20.046
12:51:58	-3.8626	2.9365	-1.9048	-70.232	-22.9	-1.0433	-0.6658	-1.7722	-27.849	-25.23	3.1248	10.147	8.5541	30.083	18.009
12:51:59	-2.9833	4.2328	-1.271	-10.473	-19.434	0.35142	0.74557	-0.125	-17.536	-24.705	2.1313	6.9399	7.7244	25.077	14.175
12:52:00	-2.7903	5.2475	-1.5937	-30.746	-17.456	0.67718	0.51113	-1.6	-18.693	-20.659	2.181	6.2272	6.5628	24.423	12.737
12:52:01	-3.7039	2.9124	-2.7216	-77.14	-23.566	-0.65043	-0.80687	-5.1066	-29.113	-24.42	2.7274	8.8997	7.7244	28.124	14.295
12:52:02	-3.691	2.9446	-2.7053	-67.9	-19.301	-0.57514	-0.61877	-4.3943	-27.252	-22.985	2.7274	8.8997	10.214	27.253	14.295
12:52:03	-3.5452	3.4535	-2.1967	-33.101	-17.606	-0.25756	0.15398	-3.4783	-19.421	-21.534	2.7274	8.3652	9.3839	23.553	12.498
12:52:04	-3.5709	3.4374	-2.3046	-38.172	-24.954	-0.40816	0.05994	-2.6693	-22.985	-26.898	2.7274	8.187	7.7244	27.036	12.258
12:52:05	-3.0519	3.9033	-1.3644	-38.499	-25.555	0.48564	0.14084	-0.25947	-24.894	-29.47	2.1313	6.9399	9.3839	26.383	13.336
12:52:06	-3.2964	3.1936	-1.8785	-63.978	-24.656	-0.14132	-0.48428	-1.4129	-30.404	-29.854	2.7274	8.0089	8.5541	26.383	15.373
12:52:07	-3.8067	2.1681	-2.2575	-68.474	-27.075	-0.44911	-0.75361	-2.1882	-30.61	-29.426	3.3732	9.0778	7.8904	28.777	16.931
12:52:08	-3.9139	2.1789	-2.4343	-43.288	-27.584	-0.54079	-0.24985	-2.8101	-26.811	-30.054	2.9758	9.256	12.537	28.777	16.811
12:52:09	-3.9183	2.784	-2.6065	-47.683	-23.197	-0.83379	-0.23602	-4.0224	-26.425	-27.904	3.0255	8.8997	9.3839	29.866	17.29
12:52:10	-3.8668	2.7732	-2.737	-72.599	-22.693	-0.5326	-0.73979	-4.9911	-28.643	-25.425	2.9758	8.7215	9.052	29.648	17.53
12:52:11	-3.0862	3.4455	-2.0933	-35.873	-24.211	0.55275	0.10696	-3.6968	-22.585	-25.843	2.3797	5.8709	9.3839	27.253	15.253
12:52:12	-3.3478	2.91	-2.5902	-34.025	-25.471	0.3612	0.0596	-3.3102	-24.82	-29.919	2.5287	7.6525	6.7287	29.213	15.613
12:52:13	-3.7853	2.8697	-2.2421	-45.553	-26.354	-0.59152	-0.17551	-2.3038	-27.013	-30.38	2.8268	9.256	10.546	28.342	16.452
12:52:14	-3.7124	3.3409	-2.0082	-66.018	-26.897	-0.43273	-0.50433	-1.5537	-29.289	-28.855	2.8765	8.8997	11.043	28.56	16.452
12:52:15	-3.6524	3.357	-1.6917	-61.544	-25.36	-0.34924	-0.41028	-1.144	-29.215	-30.208	2.8268	9.0778	7.3925	28.342	16.811
12:52:16	-3.7681	2.4441	-2.6836	-34.307	-28.172	-0.22322	-0.02131	-3.4446	-26.466	-32.547	2.6281	8.8997	12.371	30.954	17.77
12:52:17	-3.0563	2.8029	-2.6899	-20.457	-31.017	0.19264	0.31477	-4.5099	-23.741	-32.733	2.0816	6.5835	7.7244	28.56	17.051
12:52:18	-3.6438	1.9806	-3.0589	-78.098	-27.852	-0.56695	-0.96867	-5.6382	-34.709	-33.032	2.6778	9.0778	10.214	31.172	18.609
12:52:19	-3.9655	2.0635	-3.0327	-98.821	-29.397	-0.84198	-1.3649	-5.2789	-38.499	-34.071	3.1745	9.6123	13.699	32.478	19.208
12:52:20	-3.8111	2.5109	-2.4143	-59.605	-30.3	-0.74211	-0.51158	-3.5161	-30.923	-32.3	3.0255	9.256	7.5585	29.43	18.848
12:52:21	-3.7338	2.768	-2.2784	-52.438	-25.044	-0.29032	-0.33006	-2.3101	-28.145	-29.305	2.8268	8.8997	11.375	28.56	17.65
12:52:22	-3.4593	3.4749	-1.8214	-49.937	-23.39	-0.02348	-0.16168	-1.2848	-26.561	-28.092	2.6281	8.187	8.7201	25.947	16.811
12:52:23	-2.3527	4.5165	-0.67351	-40.358	-24.348	1.6299	0.20169	1.5159	-22.725	-26.176	2.032	6.049	5.0692	23.77	15.373
12:52:24	-3.5493	3.0411	-2.5223	-40.764	-24.288	0.25314	-0.0545	-2.7071	-25.096	-28.171	2.8268	8.7215	11.707	28.995	16.452
12:52:25	-3.8325	2.4574	-2.981	-52.461	-25.417	-0.59971	-0.384	-5.3881	-28.277	-29.601	2.6778	9.0778	8.5541	31.39	17.051
12:52:26	-3.8712	1.9726	-3.1161	-79.923	-27.683	-0.8256	-1.0157	-5.7663	-32.343	-29.223	2.8765	9.0778	11.375	32.043	17.29
12:52:27	-3.5495	2.883	-2.368	-63.73	-23.956	-0.55057	-0.53821	-3.8628	-28.956	-28.113	2.8268	8.7215	10.214	28.124	16.092
12:52:28	-3.0949	4.4283	-1.3444	1.111	-20.335	-0.03326	1.0076	-0.96545	-15.013	-23.859	2.3797	7.118	5.2352	23.553	14.654
12:52:29	-2.6831	4.8862	-1.0634	-1.0189	-21.869	0.76886	1.0415	0.26578	-14.425	-23.431	2.1313	5.6927	9.052	22.464	14.415
12:52:30	-3.4851	4.329	-1.7071	-49.295	-19.564	-0.17408	-0.01336	-1.0284	-22.808	-22.645	2.2803	8.0089	5.4011	24.423	14.295
12:52:31	-3.6052	4.0478	-1.8368	-63.37	-20.373	-0.34105	-0.33595	-1.1692	-26.849	-25.022	2.6281	8.3652	8.7201	25.294	13.696
12:52:32	-3.8325	2.5591	-2.6999	-45.181	-25.603	-0.59971	-0.22944	-4.1569	-24.841	-26.933	2.8268	8.8997	10.38	28.342	14.415
12:52:33	-3.8495	2.2111	-2.8196	-33.608	-22.72	-0.1643	-0.06176	-4.6507	-22.384	-25.584	2.9758	9.256	8.2223	29.43	15.253
12:52:34	-3.305	3.2367	-2.4777	-28.943	-20.002	0.07639	0.20758	-4.7095	-21.19	-24.264	2.181	6.9399	10.38	27.253	15.014
12:52:35	-2.8761	4.6263	-1.5212	-31.028	-21.815	0.4431	0.40327	-1.5874	-20.339	-23.113	2.0816	6.049	5.0692	25.294	14.535
12:52:36	-3.5366	4.2059	-1.9828	-40.111	-20.296	-0.47527	0.14775	-2.0222	-21.277	-22.695	2.7274	8.187	8.8861	24.641	14.535
12:52:37	-3.498	4.4416	-1.7071	-17.178	-19.134	-0.24937	0.64495	-1.0284	-17.614	-23.419	3.0255	8.187	8.7201	23.553	13.696
12:52:38	-3.7725	3.6249	-2.0861	-28.954	-24.35	-0.51622	0.275	-1.8037	-21.256	-25.713	2.8765	7.8307	6.3968	26.165	14.175
12:52:39	-3.6137	3.6221	-2.1224	-51.763	-21.743	-0.12335	-0.18174	-1.81	-24.195	-24.103	2.9758	8.5434	11.209	25.294	14.055
12:52:40	-2.8589	4.8673	-1.3281	-28.718	-19.134	0.8114	0.49074	-0.25317	-19.874	-23.419	2.1313	6.049	4.4054	23.77	12.498
12:52:41	-3.1248	3.5392	-2.0516	-31.309	-25.313	0.32685	0.21449	-3.4531	-21.985	-27.114	2.2307	7.2962	8.7201	25.512	14.175
12:52:42	-3.7897	2.0985	-3.2566	-66.096	-26.069	-0.88452	-0.72007	-6.3819	-29.75	-28.249	3.0752	9.0778	11.873	31.39	16.931
12:52:43	-3.824	2.8001	-2.9447	-42.905	-22.11	-0.81741	-0.14198	-5.3818	-24.573	-26.25	3.1248	9.0778	7.3925	28.995	17.051
12:52:44	-3.7725	2.4091	-2.825	-65.916	-25.216	-0.51622	-0.66614	-4.8881	-28.697	-27.021	2.7274	8.8997	12.537	29.213	16.691
12:52:45	-3.7083	3.4266	-2.4397	-63.572	-24.235	-0.94344	-0.44382	-3.0475	-28.034	-27.39	2.8268	8.7215	7.8904	27.036	15.134
12:52:46	-2.7774	5.0174	-1.1722	-8.1407	-20.566	0.75248	0.92743	0.24688	-16.939	-25.21	2.5287	6.049	6.0649	23.335	13.935
12:52:47	-3.1506	4.704	-1.5412	-31.174	-23.48	0.17626	0.41675	-0.88139	-21.194	-25.331	2.7771	7.2962	9.3839	25.077	15.373
12:52:48	-3.6866	3.8446	-1.9719	-10.518	-24.309	-0.28213	0.67815	-1.5474	-17.799	-25.475	3.0255	8.3652	6.0649	26.383	16.332
12:52:49	-3.631	4.0265	-1.6237	-47.266	-21.076	-0.49165	-0.02027	-0.54099	-23.989	-25.376	2.7274	8.5434	9.7158	25.73	16.092
12:52:50	-3.6866	3.3489	-2.1641	-63.595	-24.622	-0.28213	-0.45731	-2.0537	-28.166	-27.303	2.8268	8.7215	8.8861	27.253	15.134
12:52:51	-3.974	2.4787	-2.7208	-68.238	-26.443	-0.62428	-0.69968	-4.2788	-29.227	-28.082	3.0255	8.8997	8.5541	30.301	16.092
12:52:52	-3.1462	3.4937	-2.1967	-22.249	-23.474	0.46926	0.3891	-3.4783	-21.178	-27.644	1.8333	6.4054	10.546	28.777	15.253
12:52:53	-3.3694	2.9715	-2.6437	-38.612	-26.562	-0.3001	-0.02097	-4.8566	-25.552	-30.185	2.9261	8.0089	7.5585	30.083	17.051
12:52:54	-3.884	1.8816	-3.3137	-61.814	-30.549	-0.9009	-0.66648	-6.5101	-30.795	-31.88	3.0752	9.4342	11.209	32.043	18.848
12:52:55	-4.0856	2.8509	-2.6845	-73.016	-25.264	-1.009	-0.7263	-4.2725	-31.079	-29.651	2.6778	8.0089	12.039	28.777	18.129
12:52:56	-3.7552	2.9152	-2.3935	-54.535	-24.894	-0.14792	-0.35012	-3.3942	-27.359	-28.893	2.6778	8.7215	7.7244	28.342	17.65
12:52:57	-3.515	2.9554	-2.1904	-43.153	-28.303	0.18603	-0.11501	-2.413	-26.021	-30.025	2.7771	8.5434	9.8817	28.995	17.41
12:52:58	-2.3829	4.7229	-0.90743	-3.8809	-24.495	1.1863	0.96754	0.76583	-18.116	-27.975	2.2307	5.6927	7.5585	24.423	15.253
12:52:59	-3.1678	3.606	-1.4578	-57.047	-26.255	-0.19204	-0.27579	-0.39393	-29.009	-31.212	2.7274	7.8307	6.5628	27.253	16.092
12:53:00	-3.8926	1.3699	-2.6311	-119.71	-33.728	-0.68319	-1.896	-2.726	-43.277	-36.366	3.3235	10.147	13.699	33.131	18.129
12:53:01	-3.7897	1.6994	-2.7608	-92.127	-33.176	-0.88452	-1.2913	-2.8668	-38.486	-36.424	3.0255	10.325	11.707	32.696	19.807
12:53:02	-3.631	2.5242	-2.3355	-78.176	-30.112	-0.49165	-0.87429	-2.4382	-35.169	-35.43	3.0752	9.6123	9.7158	30.954	20.286
12:53:03	-3.691	2.0985	-2.4751	-66.761	-32.182	-0.57514	-0.72007	-2.226	-33.634	-36.252	2.6281	9.0778	13.533	32.696	20.286
12:53:04	-3.0261	2.9554	-2.1141	-43.727	-32.89	0.63623	-0.11501	-3.8187	-29.379	-34.755	2.2803	7.2962	6.8947	30.519	18.489
12:53:05	-3.9869	1.8414	-2.7933	-73.635	-30.197	-0.69957	-0.90159	-4.2914	-34.7	-34.519	3.0255	9.4342	11.375	34.002	21.364
12:53:06	-4.0727	1.4745	-3.1623	-89.682	-29.286	-0.93366	-1.2847	-5.4196	-37.231	-34.361	3.0752	9.256	13.201	33.784	21.724
12:53:07	-3.824	1.6217	-3.1886	-91.868	-31.994	-0.81741	-1.3047	-5.7789	-36.972	-34.214	3.1248	9.0778	9.052	33.131	22.083
12:53:08	-3.884	1.2496	-3.2874	-87.496	-32.115	-0.9009	-1.2781	-6.1508	-37.49	-35.392	2.9758	9.6123	14.03	34.22	19.807
12:53:09	-3.7039	1.678	-2.8721	-76.013	-29.795	-0.65043	-0.97559	-5.3692	-35.56	-34.989	2.6281	8.5434	11.541	33.349	19.088
12:53:10	-3.0176	2.5672	-2.7587	-43.795	-31.879	0.41853	-0.18243	-5.9408	-29.774	-35.891	2.2803	7.118	8.7201	30.737	18.968
12:53:11	-4.1415	0.97114	-3.2411	-78.447	-34.364	-1.6032	-1.144	-6.4975	-36.75	-36.322	2.9758	9.9687	15.524	35.526	21.844
12:53:12	-3.648	1.5308	-3.1052	-73.883	-31.628	-0.05624	-0.95553	-5.2915	-36.149	-36.773	3.2242	11.038	11.707	34.437	21.245
12:53:13	-3.8926	1.7529	-2.8867	-99.024	-30.884	-0.68319	-1.4188	-4.4258	-39.684	-35.718	2.8268	9.7905	10.711	33.567	20.885
12:53:14	-4.1928	0.8746	-3.0998	-106.07	-34.572	-1.1006	-1.7082	-5.054	-41.737	-36.127	3.2242	9.9687	15.026	35.526	21.724
12:53:15	-3.6866	1.9484	-2.2892	-87.575	-32.79	-0.28213	-1.1568	-2.7849	-37.951	-36.049	2.8268	8.7215	9.7158	32.043	21.125
12:53:16	-2.9746	2.9687	-1.6509	-62.366	-30.33	0.93743	-0.4777	-1.7281	-34.021	-36.239	2.1313	6.2272	10.048	30.301	20.406
12:53:17	-3.7253	1.7235	-2.2212	-85.411	-34.127	-0.50803	-1.1502	-2.1819	-38.342	-37.284	3.0752	9.9687	13.201	34.22	21.724
12:53:18	-3.6866	1.903	-2.1541	-78.413	-34.446	-0.28213	-0.98216	-2.4067	-36.552	-36.799	2.9758	9.7905	10.38	35.308	21.964
12:53:19	-3.841	1.769	-2.3672	-94.516	-31.035	-0.382	-1.3248	-3.0349	-39.412	-36.13	3.0752	9.7905	14.86	34.437	22.443
12:53:20	-4.21	1.2415	-2.4297	-90.256	-34.329	-1.4689	-1.3251	-3.4005	-40.589	-38.939	2.9261	10.325	12.703	35.744	23.162
12:53:21	-3.5622	1.8414	-2.0607	-74.176	-37.269	0.17784	-0.90159	-2.2723	-37.86	-40.143	2.6778	8.7215	10.877	34.437	21.604
12:53:22	-2.9833	2.5322	-1.63	-76.407	-33.76	0.35142	-0.82726	-1.6063	-37.865	-39.843	2.4294	7.4744	13.367	30.301	21.484
12:53:23	-3.6696	1.1933	-2.3409	-104.24	-35.29	-0.71754	-1.6073	-2.6756	-44.103	-41.265	3.2242	10.503	10.877	35.961	23.282
12:53:24	-4.0255	0.51573	-2.5794	-120.47	-39.321	-0.92547	-2.0443	-2.8353	-47.688	-42.274	3.4229	10.681	15.026	37.485	24.6
12:53:25	-4.1327	1.2013	-2.4452	-101.72	-35.515	-1.0172	-1.5602	-3.285	-42.387	-39.762	3.0752	10.325	13.699	36.397	24.24
12:53:26	-3.8882	1.67	-2.388	-78.638	-31.914	-0.39019	-1.0226	-3.1568	-37.869	-37.979	2.9261	9.9687	10.38	34.437	22.922
12:53:27	-3.5408	1.6165	-2.4252	-71.607	-33.794	0.03544	-0.89502	-3.991	-35.881	-37.689	2.5287	8.3652	14.03	35.308	22.203
12:53:28	-2.889	2.7064	-2.0987	-48.235	-29.482	0.3678	-0.2495	-3.9343	-29.651	-33.161	2.181	6.7617	8.7201	30.301	20.885
12:53:29	-3.6096	1.9271	-3.1069	-71.201	-28.128	-0.63405	-0.84109	-6.9472	-33.511	-33.234	3.1248	9.256	12.371	34.655	21.005
12:53:30	-3.824	1.6378	-3.0127	-87.417	-30.764	-0.81741	-1.2107	-5.9849	-37.03	-34.077	3.4229	9.4342	13.367	35.308	20.765
12:53:31	-4.0384	1.295	-3.1006	-96.68	-32.352	-1.0008	-1.4527	-5.8819	-39.021	-34.43	3.0752	9.4342	10.048	34.655	20.406
12:53:32	-4.0941	1.3566	-3.3191	-101.3	-29.367	-0.79125	-1.5333	-6.7475	-39.951	-34.837	3.1248	10.147	16.022	35.744	20.166
12:53:33	-3.2663	2.5483	-2.3889	-71.269	-29.852	0.30228	-0.73322	-3.9847	-33.906	-34.382	2.7274	7.6525	9.218	32.043	18.968
12:53:34	-2.8375	2.6581	-1.786	-62.344	-32.888	0.66899	-0.53164	-2.1063	-33.889	-35.68	2.1313	7.118	10.38	32.26	19.208
12:53:35	-3.7511	1.8788	-2.398	-85.377	-31.474	-0.65862	-1.1232	-2.8038	-38.145	-37.286	3.0752	9.7905	13.699	34.002	20.885
12:53:36	-3.7382	1.3968	-2.3772	-90.189	-34.633	-0.58333	-1.2982	-2.6819	-40.194	-38.837	3.3235	9.6123	10.214	35.744	21.844
12:53:37	-3.8626	1.9001	-2.5277	-101.66	-34.69	-1.0433	-1.4389	-2.9446	-42.058	-38.23	3.5222	9.9687	15.69	35.526	21.964
12:53:38	-3.5366	3.1373	-1.6029	-80.273	-26.06	-0.47527	-0.81344	-0.41913	-34.384	-31.949	2.7274	8.3652	8.0563	29.648	20.046
12:53:39	-3.1934	2.9526	-1.7326	-66.637	-29.993	0.46107	-0.57175	-0.55989	-32.91	-33.326	2.4294	7.8307	11.043	29.866	17.65
12:53:40	-3.2063	2.0047	-1.4052	-71.573	-34.238	0.38577	-0.8276	0.32465	-35.684	-36.994	2.6778	7.6525	9.8817	32.043	18.129
12:53:41	-3.9526	0.81305	-2.8087	-101.94	-33.981	-0.76668	-1.6277	-4.1758	-43.704	-40.189	3.1745	10.147	13.367	37.485	21.245
12:53:42	-4.0126	0.50244	-3.1523	-101.94	-36.55	-0.85017	-1.6816	-5.7726	-43.704	-40.173	3.1745	10.325	14.694	38.138	22.683
12:53:43	-3.841	0.91483	-3.0544	-94.809	-33.229	-0.382	-1.4731	-6.2286	-41.124	-37.205	3.0752	10.325	11.375	38.138	22.683
12:53:44	-3.6222	1.5521	-2.9301	-89.344	-24.204	0.09436	-1.2712	-6.3253	-35.256	-28.619	2.9261	9.4342	14.362	34.437	21.604
12:53:45	-2.5244	4.4469	-1.2256	-37.891	-22.257	1.1617	0.23523	-1.2995	-21.339	-22.881	2.1313	5.3364	4.2395	26.818	16.212
12:53:46	-3.3222	3.5819	-1.698	-63.471	-21.698	-0.29191	-0.41686	-2.2093	-27.442	-25.253	2.6778	7.8307	11.541	27.907	15.493
12:53:47	-3.7511	3.116	-1.8839	-64.023	-26.685	-0.65862	-0.49776	-1.6504	-30.668	-30.438	3.2739	9.256	7.8904	32.26	16.332
12:53:48	-3.7639	2.7358	-1.9465	-61.69	-27.681	-0.73392	-0.51816	-2.0159	-30.071	-30.148	3.1248	9.4342	13.533	32.26	17.65
12:53:49	-3.305	4.3612	-1.281	-40.235	-19.161	0.07639	0.17472	0.22799	-22.001	-23.578	2.9758	8.5434	5.733	26.818	16.212
12:53:50	-3.4508	3.4427	-2.0616	-58.738	-23.082	-0.24118	-0.34978	-3.1001	-25.853	-24.413	2.9758	7.8307	10.877	28.342	16.092
12:53:51	-2.5416	4.1041	-1.4124	-47.514	-22.621	0.79343	-0.00679	-1.5685	-25.437	-26.416	2.1313	5.5145	5.0692	24.206	14.175
12:53:52	-3.691	2.3608	-2.8096	-80.07	-26.397	-0.57514	-0.94828	-5.0037	-33.199	-29.694	2.9261	8.7215	13.035	32.26	15.014
12:53:53	-3.6696	2.1842	-2.7008	-64.068	-28.053	-0.71754	-0.65957	-4.9848	-30.931	-30.444	2.9758	9.0778	9.3839	33.131	16.811
12:53:54	-3.7639	2.3314	-2.378	-66.457	-26.339	-0.73392	-0.67962	-3.5098	-31.857	-30.764	3.1248	9.256	13.201	33.567	17.41
12:53:55	-3.631	2.6875	-1.8422	-75.652	-29.956	-0.49165	-0.80029	-1.4066	-33.454	-31.7	2.9758	9.0778	8.3882	31.172	17.53
12:53:56	-3.4251	3.0142	-1.7334	-71.021	-25.856	-0.09059	-0.65231	-1.3877	-32.458	-30.757	2.8765	7.8307	12.371	30.954	17.051
12:53:57	-2.7645	3.7694	-1.3244	-54.726	-27.158	0.82778	-0.2018	-1.6714	-28.478	-29.44	2.33	5.5145	5.5671	28.777	16.332
12:53:58	-3.5967	2.5805	-2.0045	-61.679	-25.183	-0.55876	-0.54512	-2.972	-30.005	-29.174	3.0752	8.0089	13.533	32.696	18.728
12:53:59	-3.6696	2.1307	-2.4931	-57.092	-26.825	-0.71754	-0.53198	-4.594	-29.272	-29.845	3.5222	8.5434	7.7244	32.696	18.129
12:54:00	-3.6224	1.6298	-2.6228	-89.276	-26.231	-0.70935	-1.2577	-4.7347	-34.861	-29.665	3.3732	8.5434	14.694	32.696	17.77
12:54:01	-3.3222	3.6274	-1.5412	-72.824	-23.462	-0.29191	-0.59147	-0.88139	-29.96	-27.101	3.0752	8.3652	6.2309	28.777	16.212
12:54:02	-2.8761	4.0534	-1.1985	-17.381	-22.515	0.4431	0.57753	-0.11241	-18.799	-24.854	2.3797	7.2962	10.546	26.818	15.014
12:54:03	-2.2158	4.8512	-0.68436	-33.248	-19.287	0.55776	0.39669	1.041	-20.277	-22.906	1.9326	6.049	3.7416	23.553	13.216
12:54:04	-3.3779	3.7561	-1.9002	-35.513	-19.993	-0.0824	0.1609	-2.3626	-20.479	-22.334	2.8268	7.4744	9.052	25.947	14.295
12:54:05	-3.6567	2.8963	-2.5086	-81.715	-19.784	-0.64224	-0.90091	-4.4784	-29.779	-22.992	3.1745	7.4744	9.5498	29.648	13.696
12:54:06	-3.5838	3.3409	-2.2067	-65.747	-22.998	-0.48346	-0.50433	-3.1253	-27.709	-24.861	3.1745	8.0089	7.2266	28.342	13.816
12:54:07	-3.4593	3.9649	-1.5049	-42.736	-20.719	-0.02348	0.06028	-0.87509	-23.585	-24.697	3.1745	8.0089	11.541	27.253	13.816
12:54:08	-2.4385	5.6305	-0.57012	-10.034	-18.148	1.3958	0.98828	1.2974	-14.968	-20.008	2.181	5.3364	1.7503	22.464	11.898
12:54:09	-2.8032	4.9691	-1.5004	-21.562	-16.726	0.60189	0.64529	-1.4655	-17.162	-19.684	2.4791	6.7617	10.048	24.423	12.378
12:54:10	-3.5797	3.4588	-2.3843	-53.724	-17.776	-0.99416	-0.25573	-4.5751	-22.619	-19.712	3.2242	8.3652	6.3968	27.907	13.097
12:54:11	-3.215	4.5326	-1.6871	-35.13	-15.971	-0.20023	0.29573	-1.7344	-18.24	-18.088	2.7771	6.7617	7.3925	25.73	11.539
12:54:12	-3.331	4.6183	-1.0634	-32.921	-16.825	-0.87792	0.35624	0.26578	-18.368	-18.853	2.7771	6.9399	9.5498	24.859	11.06
12:54:13	-3.3436	4.2807	-1.3852	-63.032	-18.561	-0.14951	-0.2955	-0.38133	-24.874	-20.543	2.8268	7.118	3.5757	25.294	10.7
12:54:14	-2.2929	5.9387	-1.0542	33.824	-15.319	0.90967	1.9087	-0.91506	-6.3303	-18.977	2.0816	5.3364	8.0563	22.464	9.7416
12:54:15	-3.1292	4.1524	-1.8385	-33.113	-19.444	0.03385	0.27534	-2.8249	-19.487	-21.005	2.8268	7.8307	5.2352	26.165	10.82
12:54:16	-3.215	5.0653	-1.3281	-60.654	-17.289	-0.20023	-0.11364	-0.25317	-24.014	-21.093	2.6281	7.6525	6.3968	23.553	10.94
12:54:17	-3.408	4.2542	-1.6763	-26.306	-20.145	-0.526	0.42989	-1.2596	-18.816	-22.283	2.9261	8.0089	10.38	23.988	11.779
12:54:18	-3.3351	3.981	-2.0924	-37.936	-20.916	-0.36721	0.15432	-2.869	-21.602	-23.497	3.0752	6.7617	3.7416	26.6	12.018
12:54:19	-2.9491	3.4881	-1.9528	-68.035	-21.397	0.28431	-0.52439	-3.0812	-28.042	-24.429	2.5784	6.2272	10.38	28.124	12.498
12:54:20	-2.6017	5.0789	-0.87658	-12.738	-22.681	0.70993	0.84687	0.5347	-17.738	-24.421	2.181	6.7617	6.5628	22.9	12.378
12:54:21	-3.2836	4.1978	-1.718	-42.849	-22.04	-0.06602	0.10073	-1.5033	-24.244	-26.777	2.6281	8.7215	4.5714	26.6	13.816
12:54:22	-3.7168	2.1331	-2.7579	-100.65	-26.345	-0.72573	-1.3984	-5.1129	-36.133	-28.451	3.0752	7.2962	13.865	31.825	16.092
12:54:23	-3.5666	2.7197	-2.5548	-66.243	-25.694	-0.11516	-0.6122	-4.1317	-30.606	-29.34	3.0255	8.3652	10.048	30.737	15.972
12:54:24	-3.4851	3.3196	-1.806	-50.207	-26.7	-0.17408	-0.18865	-1.4003	-28.141	-30.055	3.2242	9.256	5.733	28.777	15.853
12:54:25	-2.9104	3.1856	-1.5729	-66.367	-28.107	0.51021	-0.5313	-1.4781	-31.33	-30.762	2.4791	6.2272	11.873	30.301	15.373
12:54:26	-3.022	2.6501	-2.1975	-64.181	-26.353	0.12553	-0.57866	-4.3062	-31.589	-30.843	2.3797	5.6927	10.048	32.913	17.051
12:54:27	-3.5281	3.0705	-2.1287	-54.895	-28.312	-0.69297	-0.32315	-2.8753	-29.466	-31.492	3.0255	9.256	5.733	29.648	17.65
12:54:28	-3.5753	2.9044	-2.0499	-80.002	-25.668	-0.70116	-0.85389	-1.7974	-32.804	-28.719	3.2242	8.8997	12.703	30.519	17.051
12:54:29	-3.4766	3.3489	-1.9111	-63.527	-22.098	-0.39178	-0.45731	-2.8375	-27.771	-25.708	3.2242	7.118	11.043	29.43	17.29
12:54:30	-3.541	3.0411	-2.4306	-40.539	-24.1	-0.76827	-0.0545	-4.2284	-23.779	-26.132	3.0752	8.8997	4.7373	29.648	16.212
12:54:31	-2.4772	5.1083	-0.74691	-26.554	-21.189	1.1699	0.57821	0.67546	-20.264	-24.624	1.9823	6.2272	5.733	23.988	13.456
12:54:32	-2.829	3.9943	-1.3236	-56.811	-24.082	0.45129	-0.20837	-0.8436	-27.627	-27.441	2.4294	5.1582	11.541	26.6	14.295
12:54:33	-3.6395	2.3797	-2.4569	-52.596	-28.259	-0.27394	-0.39748	-4.5877	-29.067	-30.711	3.2739	8.7215	7.7244	32.26	16.452
12:54:34	-3.631	2.2751	-2.3735	-82.718	-28.378	-0.49165	-1.0088	-4.1002	-35.639	-32.815	3.1745	9.9687	8.3882	32.478	16.931
12:54:35	-3.6438	2.2429	-2.1024	-92.003	-29.467	-0.56695	-1.1969	-2.516	-37.762	-33.544	3.0255	7.8307	14.362	32.696	17.65
12:54:36	-3.6652	1.7879	-2.5865	-66.412	-28.217	-0.42454	-0.77401	-4.7284	-31.593	-30.935	2.9758	8.7215	11.541	33.784	18.728
12:54:37	-2.3573	4.1391	-1.4849	-15.578	-23.819	0.53318	0.63804	-1.5811	-21.297	-27.781	2.4294	5.8709	2.746	27.907	15.972
12:54:38	-3.0949	3.7078	-1.4478	-50.072	-24.729	-0.03326	-0.12123	-0.74692	-27.351	-28.401	2.6281	7.4744	10.214	28.995	15.853
12:54:39	-3.498	2.294	-2.5131	-54.704	-27.461	-0.24937	-0.45799	-3.888	-28.347	-29.801	3.1745	8.187	14.694	33.131	17.77
12:54:40	-3.7039	1.9617	-2.6491	-105.49	-27.583	-0.65043	-1.5195	-5.094	-38.38	-30.517	3.4229	10.147	9.052	33.131	17.65
12:54:41	-3.5366	2.9152	-1.6763	-54.94	-26.518	-0.47527	-0.35012	-1.2596	-29.729	-30.872	3.2739	8.187	6.3968	31.172	16.691
12:54:42	-3.734	2.1975	-2.0716	-82.785	-30.187	-1.094	-1.0223	-2.7471	-36.034	-33.052	2.8765	8.7215	14.03	34.002	17.29
12:54:43	-2.8032	2.634	-2.0416	-68.925	-29.595	0.60189	-0.67271	-3.8061	-33.244	-32.409	2.33	7.118	12.537	32.26	16.212
12:54:44	-3.2364	3.266	-1.552	-43.536	-27.716	-0.05783	-0.06108	-1.3562	-28.26	-32.237	3.0752	6.7617	6.7287	31.39	17.29
12:54:45	-3.6954	2.1653	-2.077	-92.015	-29.867	-0.86814	-1.2104	-2.9845	-37.828	-33.999	3.0255	9.4342	7.8904	33.784	18.968
12:54:46	-3.824	1.0701	-3.0181	-94.505	-31.853	-0.81741	-1.4461	-6.2223	-39.346	-35.269	2.9758	9.4342	15.524	36.614	20.046
12:54:47	-3.691	1.7022	-2.2484	-69.229	-31.163	-0.57514	-0.83452	-3.369	-35.021	-34.995	3.3235	8.7215	15.69	35.308	19.327
12:54:48	-3.3093	2.8963	-1.8377	-82.695	-27.509	-0.21661	-0.90091	-1.9971	-35.507	-32.432	3.0255	10.147	7.2266	31.825	17.65
12:54:49	-2.7259	3.3384	-1.5692	-22.587	-25.901	1.0537	0.36213	-2.8964	-23.153	-29.145	2.2307	4.8019	4.4054	29.866	15.733
12:54:50	-3.3222	4.1443	-1.4686	-35.941	-22.293	-0.29191	0.22831	-0.86879	-22.98	-24.97	2.7771	8.187	10.546	28.124	16.452
12:54:51	-3.4423	3.8068	-1.796	-65.578	-20.281	-0.45889	-0.42343	-1.7533	-26.722	-23.078	2.9758	8.0089	12.703	27.907	16.212
12:54:52	-3.558	3.7106	-2.3526	-26.644	-21.203	-0.33286	0.3355	-3.9784	-20.791	-24.704	2.9261	7.4744	8.0563	29.213	15.014
12:54:53	-3.4681	3.7694	-1.4841	-54.399	-24.001	-0.60948	-0.2018	-0.75322	-26.569	-26.964	2.5784	9.6123	4.5714	28.56	13.216
12:54:54	-3.6825	2.4091	-2.2221	-66.198	-26.233	-0.79284	-0.66614	-3.0097	-30.343	-29.202	3.1745	7.6525	9.5498	28.342	14.295
12:54:55	-2.6187	3.5501	-1.8648	-6.4501	-25.128	1.1453	0.71826	-3.1842	-20.095	-28.856	2.33	6.9399	12.371	28.56	14.175
12:54:56	-3.2277	2.6714	-2.1487	-80.396	-28.777	0.52818	-0.89434	-2.1693	-35.108	-33.27	2.6281	7.6525	12.371	30.301	17.051
12:54:57	-3.5709	1.8897	-2.5965	-60.214	-33.282	-0.40816	-0.61945	-4.3754	-34.478	-37.985	2.9758	9.9687	8.5541	34.873	18.609
12:54:58	-3.8369	0.81305	-3.1632	-102.2	-37.375	-0.89271	-1.6277	-6.2475	-45.218	-41.704	3.1745	10.503	10.711	39.009	19.807
12:54:59	-4.0683	0.45417	-2.5748	-115.97	-38.379	-0.64066	-1.9637	-3.4257	-47.482	-43.344	2.9261	10.147	16.686	39.009	21.724
12:55:00	-3.8109	-0.01418	-3.1786	-72.767	-40.885	0.0616	-1.1782	-6.1319	-42.662	-46.248	2.7274	11.038	19.839	42.274	24.12
12:55:01	-3.4421	-0.15899	-2.8567	-114.37	-42.95	0.34482	-2.0246	-5.4848	-42.46	-48.92	3.0255	8.187	14.86	41.186	26.517
12:55:02	-3.9738	-0.00369	-2.7933	-114.38	-43.419	0.17943	-1.9976	-4.2914	-44.456	-49.31	3.4726	12.463	10.877	41.404	26.757
12:55:03	-4.3557	-1.2006	-3.6881	-123.72	-43.958	-0.9828	-2.388	-7.8758	-44.265	-49.172	3.3732	9.7905	13.865	43.58	26.757
12:55:04	-4.2227	0.12468	-3.0535	-143.86	-40.266	-0.74052	-2.5685	-5.4007	-43.461	-45.446	3.4229	12.107	18.345	40.75	25.798
12:55:05	-4.0683	0.78647	-2.8921	-65.6	-38.929	-0.64066	-0.90228	-4.6633	-39.885	-44.211	3.6216	9.9687	18.345	39.227	25.678
12:55:06	-3.7895	0.26145	-3.3445	-104.62	-37.578	-0.08081	-1.7691	-6.279	-46.342	-43.359	2.6778	10.147	12.703	39.88	24.6
12:55:07	-3.189	2.0876	-1.5937	-92.6	-33.432	0.75407	-1.2238	-1.6	-41.251	-38.86	2.2803	7.2962	6.2309	32.043	21.245
12:55:08	-4.0554	0.07676	-3.1369	-90.572	-35.844	-0.56536	-1.5274	-5.8882	-42.432	-40.744	3.3732	10.681	11.541	37.05	22.083
12:55:09	-4.3214	-0.82322	-3.7452	-148.57	-40.073	-1.0499	-2.8243	-8.004	-42.478	-45.258	3.3732	12.285	19.009	41.839	23.521
12:55:10	-4.1755	0.69797	-2.9801	-90.91	-38.639	-0.73233	-1.4195	-4.5603	-44.407	-44.392	3.1248	10.325	18.345	37.92	24.24
12:55:11	-4.167	0.06592	-3.4479	-116.29	-37.949	-0.95004	-2.0312	-6.0604	-49.325	-44.118	3.6713	11.216	13.699	38.138	23.641
12:55:12	-3.4292	1.2978	-2.2738	-74.638	-36.241	0.42012	-0.99598	-2.9005	-40.56	-42.125	2.9261	7.4744	7.2266	35.526	20.166
12:55:13	-3.8923	1.4399	-2.3726	-56.63	-39.959	0.12051	-0.60631	-3.2724	-39.605	-46.473	2.0816	10.681	10.711	35.961	21.844
12:55:14	-4.9002	-2.612	-4.2331	-172.26	-44.508	-1.2235	-3.5912	-8.7981	-43.474	-50.039	3.7209	11.75	21.166	45.757	26.637
12:55:15	-4.6729	-2.1566	-3.8849	-131.23	-48.226	-0.96483	-2.6908	-7.7917	-43.241	-54.387	3.9197	14.601	23.49	46.846	27.715
12:55:16	-4.7459	-2.2237	-3.7644	-173.1	-51.875	-1.1236	-3.5238	-6.4701	-41.72	-58.8	3.5222	11.75	18.843	47.934	28.554
12:55:17	-4.7716	-2.2772	-4.1342	-165.71	-47.454	-1.2742	-3.3962	-8.4262	-42.01	-54.099	3.9197	14.066	14.362	46.628	29.632
12:55:18	-3.8194	-1.9369	-2.6845	-113.15	-50.51	0.2793	-2.2877	-4.2725	-42.611	-57.869	3.3235	9.0778	14.528	44.887	29.273
12:55:19	-4.2227	-2.4325	-3.2774	-165.59	-46.613	-0.74052	-3.4232	-6.5038	-42.395	-53.413	3.0255	13.176	21.166	46.193	31.909
12:55:20	-4.6987	-1.7683	-4.0463	-130.82	-44.81	-1.1154	-2.6234	-8.5292	-42.184	-50.863	3.87	10.86	21.83	45.104	31.07
12:55:21	-4.4242	-0.90891	-3.4316	-151.68	-46.834	-0.84858	-2.8848	-5.3482	-42.3	-53.297	3.6713	13.354	17.681	42.71	27.715
12:55:22	-4.5786	-1.6935	-3.8841	-154.17	-48.129	-0.94845	-3.0667	-6.9639	-42.373	-54.756	3.4229	10.503	12.869	44.234	27.835
12:55:23	-4.8015	-2.7645	-4.2993	-150.16	-52.644	-0.9141	-3.1614	-7.7454	-42.313	-60.476	3.6713	14.601	17.018	47.934	30.231
12:55:24	-4.1325	-2.6735	-3.1669	-168.84	-54.394	-0.21344	-3.5106	-4.8292	-42.293	-62.246	3.2242	10.147	20.834	46.628	30.351
12:55:25	-4.7673	-3.0216	-4.1243	-157.37	-55.125	-0.98121	-3.3429	-8.7792	-42.32	-62.758	3.5222	14.957	24.485	49.894	33.107
12:55:26	-4.7245	-2.4165	-4.0363	-161.17	-48.874	-1.266	-3.3291	-8.8822	-42.325	-54.885	4.1183	11.929	19.673	45.322	33.107
12:55:27	-4.5786	-1.4766	-3.4579	-158.94	-50.638	-0.94845	-3.1203	-5.7074	-42.312	-56.734	3.8203	14.245	14.362	44.669	32.268
12:55:28	-4.7459	-2.4913	-4.2022	-138.42	-50.814	-1.1236	-2.8858	-9.0293	-42.312	-57.768	3.4229	11.572	14.196	47.281	32.987
12:55:29	-4.6858	-2.9628	-4.1914	-184.6	-52.273	-1.0401	-3.8802	-8.5544	-42.317	-59.718	3.87	14.779	20.834	47.934	32.508
12:55:30	-3.8537	-1.3692	-3.0635	-106.54	-52.726	0.34641	-2.0522	-5.0477	-42.317	-60.953	2.4791	8.8997	20.668	43.145	29.513
12:55:31	-4.6214	-2.9681	-4.2593	-164.71	-58.829	-0.66364	-3.4705	-9.1574	-42.315	-67.027	3.2739	14.066	22.494	50.329	32.029
12:55:32	-5.1018	-4.3472	-4.477	-204.4	-63.625	-1.3315	-4.4856	-9.1952	-42.315	-71.562	4.2177	13.532	17.847	53.594	35.863
12:55:33	-4.9088	-4.4836	-4.3002	-177.13	-66.17	-1.0058	-3.9618	-8.5733	-42.316	-75.166	3.7706	16.026	19.175	53.812	38.739
12:55:34	-5.4579	-5.8362	-5.1225	-252.88	-64.021	-2.3432	-5.7023	-12.145	-42.316	-72.942	3.87	14.423	26.311	58.166	40.896
12:55:35	-5.1961	-4.7113	-4.3527	-197.78	-64.515	-1.3479	-4.412	-9.2919	-42.315	-74.416	4.1183	16.383	28.8	57.077	39.937
12:55:36	-4.2225	-2.9681	-2.9247	-165.36	-63.001	0.06318	-3.4705	-6.0878	-42.316	-72.148	3.4726	11.038	21.664	53.594	38.379
12:55:37	-4.9433	-4.1062	-4.3482	-201.79	-61.419	-1.7424	-4.3982	-9.8823	-42.316	-69.945	3.4726	15.492	18.843	56.207	42.453
12:55:38	-5.4105	-3.6536	-3.6464	-183.34	-60.067	-1.5313	-3.9546	-7.6321	-42.316	-69.093	4.2674	13.532	18.677	53.159	41.255
12:55:39	-4.7587	-3.2601	-3.6156	-203.25	-52.934	-1.1989	-4.2969	-7.8632	-42.316	-60.758	3.3732	14.423	22.826	49.24	38.859
12:55:40	-4.6729	-0.98901	-3.3562	-107.14	-38.334	-0.96483	-2.0318	-7.5817	-47.992	-44.493	3.6216	10.325	19.839	42.492	33.587
12:55:41	-3.8153	3.0222	-1.5983	-68.609	-53.188	-0.23141	-0.60529	-1.0095	-31.4	-29.349	2.8765	9.9687	9.3839	29.648	25.438
12:55:42	-2.9274	3.8579	-1.0697	-29.225	-51.131	0.94562	0.31545	-0.7995	-22.836	-26.394	1.7836	4.6237	3.5757	26.165	19.088
12:55:43	-4.0812	1.5871	-2.6753	-57.149	-25.694	-0.71595	-0.62637	-5.4533	-29.602	-29.34	3.0752	10.325	9.3839	32.043	19.208
12:55:44	-3.9054	2.3045	-1.8794	-95.914	-23.959	-0.75849	-1.2774	-2.2408	-34.544	-27.188	3.4229	7.8307	14.528	30.083	17.53
12:55:45	-4.1541	2.2405	-2.4669	-47.604	-23.353	-0.87474	-0.3304	-4.2347	-25.964	-26.466	2.7771	10.147	13.533	31.607	15.613
12:55:46	-3.9869	3.0222	-2.2538	-68.407	-24.012	-0.69957	-0.60529	-3.6065	-30.215	-27.968	3.1745	7.6525	6.3968	29.43	14.055
12:55:47	-3.7037	3.6543	-1.5049	-43.119	-24.425	0.15327	0.00634	-0.87509	-25.824	-28.503	3.0255	8.5434	5.0692	28.56	14.295
12:55:48	-3.2491	2.8029	-2.1513	-20.423	-28.162	0.67058	0.31477	-4.6528	-23.544	-31.08	2.2803	5.5145	10.214	32.26	15.972
12:55:49	-4.1755	0.67104	-2.9338	-119.77	-31.893	-0.73233	-2.0173	-4.907	-43.606	-35.508	3.2242	11.038	17.681	36.832	18.249
12:55:50	-4.3771	1.0729	-2.5077	-71.775	-34.412	-0.84039	-0.98941	-3.6506	-36.869	-38.953	3.7209	9.256	13.533	36.179	19.088
12:55:51	-4.0812	1.6084	-2.9347	-73.815	-31.367	-0.71595	-0.94205	-5.7348	-35.754	-36.187	3.2739	11.929	8.0563	35.09	20.646
12:55:52	-4.0083	1.9778	-2.4877	-101.32	-30.815	-0.55717	-1.4254	-4.3565	-40.083	-35.783	3.0752	8.5434	9.5498	32.043	20.765
12:55:53	-3.7166	1.7987	-2.5131	-41.778	-32.51	0.07798	-0.27025	-3.888	-31.021	-37.234	2.8765	9.7905	14.86	32.696	19.687
12:55:54	-3.4292	0.86132	-2.6445	-88.081	-36.478	0.42012	-1.3455	-5.6844	-40.914	-41.163	2.8268	6.9399	15.69	36.397	19.807
12:55:55	-4.2699	0.91483	-2.9284	-95.35	-39.537	-0.74871	-1.4731	-4.6696	-44.284	-44.008	2.9758	12.107	11.375	38.574	21.484
12:55:56	-4.1498	0.93092	-2.8087	-90.741	-39.369	-0.58174	-1.3791	-4.1758	-43.42	-44.905	3.2739	9.9687	10.214	38.356	23.401
12:55:57	-4.5443	-0.67596	-3.8903	-150.76	-40.459	-1.0156	-2.8444	-8.0292	-39.91	-45.634	3.9693	12.819	17.349	42.057	26.397
12:55:58	-4.3686	0.35799	-2.8867	-76.869	-38.24	-1.0581	-1.2048	-4.4258	-40.564	-43.474	3.5222	9.7905	18.677	39.227	26.517
12:55:59	-3.931	1.1264	-2.6691	-78.559	-34.704	-0.10538	-1.117	-4.388	-37.408	-38.31	2.6281	10.681	11.541	35.961	24.72
12:56:00	-3.0777	2.5805	-2.125	-62.084	-29.979	0.33504	-0.54512	-4.2936	-32.375	-33.247	2.7771	6.4054	5.5671	30.737	19.807
12:56:01	-4.0212	3.5231	-2.1178	-36.313	-26.01	-0.63247	0.12044	-2.4004	-25.153	-29.781	2.9261	9.9687	8.7201	28.342	19.927
12:56:02	-4.0212	2.2136	-2.825	-77.703	-25.968	-0.63247	-0.92822	-4.8881	-32.404	-30.005	2.9261	8.0089	14.528	31.39	19.208
12:56:03	-4.1627	1.9138	-2.7996	-52.551	-26.946	-0.65704	-0.47839	-5.3566	-28.803	-31.023	2.8268	10.503	12.039	31.607	18.249
12:56:04	-3.9567	2.1065	-2.3101	-64.417	-31.59	-0.25598	-0.67305	-2.9068	-32.972	-35.146	3.3732	8.5434	6.8947	31.172	16.811
12:56:05	-3.8753	1.1639	-2.8459	-90.301	-36	-0.31489	-1.3386	-5.01	-40.852	-39.306	2.9758	9.7905	9.7158	35.09	17.41
12:56:06	-3.6093	1.946	-2.6437	-44.155	-34.317	0.16965	-0.2903	-4.8566	-31.881	-38.397	2.6778	8.0089	14.694	33.784	20.046
12:56:07	-4.2699	1.0915	-2.7879	-111.06	-36.064	-0.74871	-1.7618	-4.0539	-44.84	-41.091	3.0255	11.038	15.856	36.179	22.802
12:56:08	-4.2827	0.17575	-3.4279	-106.54	-37.057	-0.82401	-1.8296	-6.7664	-44.502	-41.726	3.5719	10.681	10.546	38.356	23.162
12:56:09	-4.2699	0.17855	-3.0435	-83.63	-38.491	-0.74871	-1.3728	-5.7537	-40.971	-42.592	3.3732	11.216	11.043	37.703	24.001
12:56:10	-4.4072	-0.01173	-2.6999	-115.69	-37.445	-1.284	-2.0446	-4.1569	-45.836	-41.177	3.2242	10.86	17.681	38.791	23.641
12:56:11	-3.4635	1.4559	-2.3843	-51.266	-35.845	0.48723	-0.51227	-4.5751	-34.329	-40.282	2.3797	8.0089	14.86	38.356	21.844
12:56:12	-3.8882	1.8333	-2.7153	-76.272	-33.213	-0.39019	-0.94862	-4.0413	-37.075	-38.051	3.0752	10.325	9.052	36.179	22.922
12:56:13	-4.1155	2.1733	-2.1178	-89.569	-29.992	-0.64885	-1.1633	-2.4004	-36.573	-33.789	3.4229	8.8997	8.3882	33.784	23.042
12:56:14	-4.1198	1.1132	-3.1006	-59.808	-31.412	-0.94185	-0.75429	-5.8819	-32.108	-34.576	2.9758	10.86	16.022	34.655	22.203
12:56:15	-4.2699	0.31496	-3.2303	-110.86	-34.166	-0.74871	-1.8967	-6.0226	-43.655	-37.985	3.1248	8.5434	15.524	36.614	21.245
12:56:16	-3.8024	1.9484	-2.1124	-87.755	-33.171	-0.15611	-1.1568	-2.163	-39.005	-38.275	3.0752	10.503	7.5585	33.131	19.327
12:56:17	-3.4034	2.4521	-2.0987	-32.706	-34.786	0.57071	0.02572	-3.9343	-30.148	-38.787	2.5784	5.5145	8.0563	32.913	19.088
12:56:18	-4.2013	0.22927	-3.5993	-113.65	-39.194	-0.88293	-1.9572	-7.1509	-46.951	-43.409	3.1745	12.107	18.179	38.574	22.323
12:56:19	-4.1498	1.188	-2.7516	-83.394	-35.403	-0.58174	-1.1976	-4.0476	-39.589	-40.513	3.2739	9.0778	15.358	35.526	22.802
12:56:20	-4.3255	0.43563	-3.2657	-76.745	-36.642	-0.5392	-1.1913	-5.2011	-39.84	-42.117	3.0752	11.572	9.218	37.485	23.641
12:56:21	-4.5358	-0.3706	-3.7815	-129.82	-38.613	-1.2333	-2.3807	-8.0103	-39.132	-43.77	3.4229	10.325	14.03	38.791	24.24
12:56:22	-3.9696	1.5175	-2.5023	-55.785	-35.349	-0.33127	-0.59283	-3.4131	-34.667	-39.733	2.9261	10.325	15.856	35.09	23.042
12:56:23	-3.2532	2.9582	-1.4215	-20.818	-31.259	1.1813	0.34173	-0.38763	-25.848	-35.089	2.4294	7.2962	8.5541	32.043	20.526
12:56:24	-3.8923	1.2468	-3.2149	-110.63	-32.304	0.12051	-1.7349	-6.1382	-42.338	-36.967	3.1745	9.7905	8.2223	35.09	21.245
12:56:25	-4.2227	1.1667	-3.0898	-67.133	-33.351	-0.74052	-0.88188	-5.407	-35.807	-37.92	2.9758	11.216	15.358	34.437	21.964
12:56:26	-4.1969	1.3381	-2.6111	-62.253	-32.486	-0.58993	-0.76087	-3.432	-33.363	-36.15	3.2739	8.8997	15.026	32.478	20.526
12:56:27	-4.2784	1.0086	-3.3291	-89.964	-31.63	-0.53101	-1.3656	-6.3945	-38.877	-35.847	3.3235	11.394	8.7201	34.22	20.885
12:56:28	-3.5279	2.8271	-2.3163	-13.426	-26.035	0.11074	0.45584	-3.9721	-21.754	-30.865	2.8765	7.118	7.7244	30.083	18.848
12:56:29	-3.0947	4.3185	-1.3907	-8.4786	-24.415	0.77045	0.80608	-0.61876	-18.914	-27.036	2.4791	7.2962	11.209	26.165	16.332
12:56:30	-3.9611	2.2429	-2.3001	-91.418	-27.72	-0.54898	-1.1969	-3.2598	-34.339	-30.849	3.0752	9.4342	9.3839	29.648	17.41
12:56:31	-4.4028	1.4399	-3.2049	-55.255	-30.402	-0.99099	-0.60631	-6.4912	-31.573	-35.249	2.9261	8.7215	8.0563	33.131	18.129
12:56:32	-4.2356	1.5336	-2.6899	-50.444	-28.874	-0.81582	-0.49878	-4.5099	-29.523	-33.363	3.0752	11.038	14.86	32.26	18.848
12:56:33	-4.3771	1.0621	-2.5123	-96.702	-32.666	-0.84039	-1.4932	-3.0601	-39.153	-35.796	3.1248	9.4342	13.533	34.437	19.208
12:56:34	-3.7851	1.6434	-2.4306	-41.676	-32.705	0.21219	-0.29722	-4.2284	-30.428	-36.96	2.9261	8.8997	7.0606	32.913	19.088
12:56:35	-3.5751	2.0317	-2.4306	-41.282	-28.696	0.10255	-0.2298	-4.2284	-28.124	-32.793	2.8765	8.7215	11.541	31.39	18.968
12:56:36	-4.2013	1.9404	-2.1795	-89.468	-29.181	-0.88293	-1.2038	-1.9382	-35.98	-32.337	3.1745	8.5434	13.533	31.39	19.807
12:56:37	-3.9011	3.1268	-1.9202	-38.42	-25.972	-0.46549	0.006	-1.6567	-24.433	-28.617	3.0255	9.7905	5.4011	28.342	17.89
12:56:38	-4.1369	2.4119	-2.7579	-43.277	-26.521	-0.50644	-0.2094	-5.1129	-26.746	-29.947	3.1745	8.8997	10.877	31.172	17.89
12:56:39	-4.2956	1.4825	-2.9184	-87.214	-28.988	-0.89931	-1.2377	-5.0226	-35.845	-32.149	3.1745	8.187	14.362	32.913	17.89
12:56:40	-3.348	3.7722	-1.2819	-31.794	-28.023	-0.44251	0.25494	-0.59986	-24.816	-31.21	2.0816	8.187	3.5757	27.689	15.373
12:56:41	-3.3735	2.9208	-1.6871	-8.8053	-26.726	0.2106	0.56337	-1.7344	-20.824	-30.676	2.5287	7.2962	9.218	28.124	17.051
12:56:42	-4.3041	1.2604	-3.3237	-61.994	-29.469	-0.68161	-0.77435	-6.1571	-31.848	-33.081	3.1248	9.4342	14.694	33.349	19.208
12:56:43	-4.3472	1.662	-2.7733	-80.306	-30.586	-1.2005	-1.0696	-4.9974	-34.581	-33.507	3.1745	11.038	7.2266	32.26	18.968
12:56:44	-4.1498	2.2485	-2.1958	-45.677	-27.276	-0.58174	-0.28338	-2.6505	-27.737	-31.543	3.0752	8.8997	12.205	30.737	18.848
12:56:45	-3.9482	2.669	-2.019	-36.2	-26.314	-0.47368	-0.02788	-2.0285	-24.495	-29.679	3.1248	9.4342	12.537	30.083	17.77
12:56:46	-3.3135	3.4777	-2.2229	-27.016	-27.928	0.29409	0.29505	-3.8376	-22.964	-30.654	2.5784	7.8307	3.9076	29.213	17.051
12:56:47	-3.4336	2.9554	-2.2855	-43.288	-26.547	0.12712	-0.11501	-4.2032	-26.811	-30.568	2.6778	7.118	11.541	29.43	16.572
12:56:48	-3.9954	2.669	-2.3672	-36.482	-29.153	-0.48187	-0.02788	-3.0349	-26.141	-32.178	2.9261	8.5434	10.711	29.213	18.009
12:56:49	-3.8539	3.1188	-1.9819	-41.034	-29.263	-0.4573	-0.04102	-1.1944	-26.676	-32.351	2.7771	9.7905	6.3968	28.342	17.53
12:56:50	-4.0768	1.9484	-2.9393	-86.955	-26.297	-0.42295	-1.1568	-5.1444	-34.33	-30.988	2.9261	8.5434	14.03	30.737	18.728
12:56:51	-4.0897	1.7746	-3.204	-48.032	-29.816	-0.49825	-0.41131	-5.6634	-28.466	-32.293	2.9758	8.8997	8.0563	30.954	17.77
12:56:52	-3.2019	3.9492	-1.9156	18.882	-27.733	0.67877	1.2894	-2.2471	-15.441	-31.391	2.181	8.187	8.3882	26.6	16.452
12:56:53	-3.5107	3.4909	-1.9248	-45.61	-28.337	0.47904	-0.06764	-1.0662	-27.342	-32.576	2.4791	7.8307	11.541	26.818	17.53
12:56:54	-4.3727	1.9673	-2.7091	-59.673	-31.427	-0.54739	-0.60597	-2.9761	-31.318	-34.192	2.9261	8.7215	7.0606	30.083	18.609
12:56:55	-4.4843	1.2685	-3.4279	-59.786	-30.265	-0.93207	-0.72733	-6.7664	-31.976	-34.916	2.7771	10.503	15.026	32.696	19.807
12:56:56	-4.1111	2.2968	-2.8976	-31.816	-28.201	-0.35584	-0.00125	-4.9007	-24.947	-31.781	2.8268	9.7905	7.8904	30.083	19.088
12:56:57	-4.1926	1.9512	-2.5231	-64.057	-29.016	-0.29693	-0.70002	-3.535	-30.865	-31.845	2.8765	9.0778	10.546	29.866	18.369
12:56:58	-3.2233	3.6784	-1.5203	-36.256	-25.32	0.82118	0.14741	-0.75952	-24.824	-29.507	2.3797	6.2272	8.3882	26.6	16.212
12:56:59	-3.6823	2.8162	-1.7914	-38.589	-29.571	0.01087	-0.04793	-2.3437	-25.421	-30.862	2.7274	8.5434	5.5671	27.907	16.931
12:57:00	-4.2098	1.4479	-3.1578	-52.743	-28.709	-0.66523	-0.55929	-6.0101	-29.922	-32.872	3.0752	10.147	14.694	32.913	18.489
12:57:01	-4.0897	1.8442	-3.2149	-50.331	-29.8	-0.49825	-0.44485	-6.1382	-28.865	-33.139	3.0255	8.7215	7.2266	30.954	18.728
12:57:02	-4.2227	1.8869	-2.6582	-82.526	-30.213	-0.74052	-1.0762	-3.9132	-34.519	-33.673	3.0255	9.256	13.201	30.301	18.369
12:57:03	-4.2312	2.0583	-2.476	-77.951	-29.633	-0.52282	-0.95519	-3.0538	-33.853	-33.572	2.9758	10.325	8.8861	30.519	18.728
12:57:04	-3.4163	3.5581	-1.4478	-4.3653	-31.179	0.49542	0.76528	-0.74692	-20.947	-34.149	2.2307	7.4744	7.8904	26.383	16.572
12:57:05	-3.8493	2.1121	-2.7108	-18.474	-30.389	0.63941	0.24044	-4.6318	-25.185	-35.169	2.6778	8.5434	11.541	31.825	19.208
12:57:06	-4.3341	0.83194	-3.5268	-73.827	-34.721	-0.3215	-1.0769	-7.1383	-35.819	-37.001	3.1745	9.6123	10.711	35.744	21.364
12:57:07	-4.2956	1.0166	-3.3708	-87.406	-30.761	-0.89931	-1.3186	-6.6383	-36.964	-35.465	3.3732	9.4342	14.362	34.437	21.005
12:57:08	-3.9696	2.1681	-2.6165	-68.812	-31.607	-0.33127	-0.75361	-3.6695	-32.585	-34.301	3.0752	9.9687	7.7244	30.737	19.807
12:57:09	-4.1797	1.8068	-2.2984	-38.803	-28.021	-0.22163	-0.22322	-1.6041	-26.671	-32.135	3.0255	9.6123	13.699	30.519	19.208
12:57:10	-3.3733	3.5553	-1.1559	-26.858	-26.769	1.0143	0.30854	0.95917	-22.042	-29.99	2.33	6.2272	3.9076	24.859	16.811
12:57:11	-3.9439	2.5913	-2.2684	-36.651	-29.631	-0.18068	-0.04136	-2.6631	-27.128	-34.498	2.7771	8.3652	12.869	28.995	16.572
12:57:12	-4.1498	1.081	-3.3028	-69.082	-31.451	-0.58174	-0.94239	-6.0352	-34.165	-35.739	2.6778	9.256	8.5541	33.131	19.687
12:57:13	-4.407	0.37127	-3.6719	-94.46	-32.705	-0.48028	-1.5675	-7.1635	-39.083	-36.96	3.0752	10.325	16.188	35.961	20.765
12:57:14	-4.6214	0.20793	-3.3954	-97.074	-37.073	-0.66364	-1.6415	-5.3419	-41.326	-40.881	3.1248	11.929	10.711	36.397	21.125
12:57:15	-4.9345	0.1705	-2.9738	-85.895	-38.255	-1.1564	-1.4199	-3.495	-41.173	-43.091	3.2739	11.75	17.349	37.485	21.964
12:57:16	-4.0766	0.12503	-2.7308	-77.207	-43.162	0.38076	-1.2453	-3.9258	-42.539	-47.337	2.6778	9.9687	10.546	37.05	22.323
12:57:17	-4.4111	-1.0079	-3.1043	-135.03	-43.927	0.03042	-2.5826	-4.4636	-41.03	-50.401	3.1248	12.107	18.013	40.315	26.517
12:57:18	-4.4672	-0.31429	-3.0835	-113.47	-38.558	-1.3675	-2.0516	-4.3418	-45.898	-43.452	3.1248	11.216	11.541	36.179	28.434
12:57:19	-4.5871	-1.123	-3.7652	-122.79	-38.295	-0.73075	-2.3745	-7.298	-48.219	-43.792	2.9758	11.216	15.69	38.791	26.757
12:57:20	-4.9216	-0.82566	-3.9992	-104.46	-40.337	-1.0811	-1.9579	-8.0481	-45.354	-44.456	3.0752	11.038	14.362	39.009	25.558
12:57:21	-4.9817	0.00995	-3.6556	-64.913	-35.071	-1.1646	-1.0371	-6.4512	-35.869	-40.456	3.2739	10.681	13.201	37.485	24.48
12:57:22	-3.3949	2.4682	-2.2321	-27.613	-34.03	0.35301	0.11976	-2.6568	-26.453	-37.19	2.5287	7.2962	11.873	31.172	22.802
12:57:23	-3.8323	2.1226	-2.2104	-59.774	-29.436	0.204	-0.579	-1.707	-31.91	-34.772	3.1745	8.8997	8.8861	30.083	22.922
12:57:24	-4.4328	2.5591	-2.3563	-45.272	-27.077	-0.63088	-0.22944	-2.5601	-25.367	-28.501	2.9261	9.7905	13.035	30.083	21.604
12:57:25	-4.4585	3.116	-2.2721	-63.753	-25.968	-0.78147	-0.49776	-1.2448	-29.087	-30.005	2.5287	9.9687	7.5585	28.342	17.77
12:57:26	-4.583	1.8949	-2.4806	-80.137	-29.483	-1.2415	-1.0292	-2.4634	-33.594	-32.698	3.3732	10.503	13.201	31.39	17.89
12:57:27	-3.8323	2.4948	-2.2112	-63.798	-26.604	0.204	-0.60563	-2.5349	-29.351	-29.961	2.6778	8.8997	9.3839	28.995	17.89
12:57:28	-3.7078	3.025	-1.8639	-45.283	-23.959	0.66398	-0.14854	-2.3563	-25.433	-27.188	1.8333	5.8709	7.0606	26.6	17.051
12:57:29	-4.7502	1.2282	-3.2666	-70.75	-28.4	-1.4166	-0.96244	-6.0289	-30.878	-29.656	3.1745	9.256	13.201	31.825	18.249
12:57:30	-4.3428	1.7102	-3.1315	-66.378	-26.157	-0.9075	-0.78749	-5.6508	-31.396	-31.58	3.2739	9.256	8.2223	30.954	16.691
12:57:31	-4.4972	0.27229	-3.3237	-78.267	-33.799	-1.0074	-1.2653	-6.1571	-35.696	-35.838	2.9758	9.9687	14.03	34.655	18.249
12:57:32	-4.9216	0.67663	-3.3283	-73.984	-35.284	-1.0811	-1.1039	-5.5667	-36.741	-38.41	2.8268	10.681	12.205	34.655	20.286
12:57:33	-4.2869	1.8816	-2.1433	-62.197	-31.848	-0.31331	-0.66648	-1.9319	-33.033	-37.119	2.9758	8.8997	10.048	32.26	20.046
12:57:34	-3.4207	3.0572	-1.6237	-36.425	-32.163	0.20241	0.03954	-0.54099	-25.811	-32.855	2.2307	7.6525	11.541	28.995	19.327
12:57:35	-4.2998	2.3769	-2.2675	-75.652	-29.674	-0.3886	-0.85423	-1.8352	-33.454	-33.811	2.9758	9.7905	8.3882	31.172	21.724
12:57:36	-4.407	3.0544	-2.1478	-59.076	-27.446	-0.48028	-0.4172	-1.3415	-27.828	-30.184	3.1745	9.4342	10.711	28.56	21.005
12:57:37	-4.034	3.0625	-2.039	-56.462	-25.083	-0.70776	-0.37017	-1.3226	-25.586	-25.3	2.6778	8.8997	9.8817	27.253	18.848
12:57:38	-4.1884	3.2339	-1.8522	-51.74	-21.587	-0.80763	-0.24916	-1.0536	-24.063	-25.542	2.9758	8.7215	7.0606	27.253	16.212
12:57:39	-3.9052	3.649	-1.65	-21.799	-22.408	0.04522	0.41607	-0.90028	-18.544	-23.293	2.4294	6.5835	8.7201	25.294	15.134
12:57:40	-3.3006	3.5714	-1.6917	-21.776	-23.218	0.36939	0.40258	-1.144	-18.413	-25.208	1.8333	6.4054	7.2266	25.947	15.493
12:57:41	-3.8882	4.0051	-2.378	-30.589	-16.963	-0.39019	0.29539	-3.5098	-17.771	-19.185	2.5287	8.187	6.2309	25.947	14.295
12:57:42	-4.5186	3.2902	-2.5811	-35.321	-20.148	-0.86496	0.07999	-4.491	-19.359	-21.358	2.7274	8.3652	10.38	26.383	14.055
12:57:43	-4.0469	3.6571	-2.4252	-18.824	-17.685	-0.78306	0.46309	-3.991	-14.195	-17.768	2.8765	8.187	7.3925	24.859	12.857
12:57:44	-3.8325	4.1632	-2.2075	-7.0368	-11.689	-0.59971	0.77911	-3.9532	-10.487	-12.793	2.8268	7.6525	5.0692	23.553	11.179
12:57:45	-3.4849	5.4245	-1.3915	20.504	-13.641	0.62963	1.5456	-1.4466	-5.9603	-16.217	1.8333	5.3364	7.7244	20.94	8.9028
12:57:46	-3.6222	4.372	-1.9002	-14.418	-19.852	0.09436	0.67849	-2.3626	-14.516	-18.222	2.8765	6.9399	6.0649	24.859	10.461
12:57:47	-3.8452	3.5392	-2.3872	-30.825	-19.747	0.1287	0.21449	-2.329	-19.154	-21.366	2.3797	8.7215	6.7287	25.294	10.94
12:57:48	-4.5528	3.1027	-2.1958	-44.72	-20.54	-0.79785	-0.13506	-2.6505	-22.141	-24.589	3.7209	8.7215	10.38	27.253	12.857
12:57:49	-3.8797	3.6008	-1.7905	-35.31	-21.711	-0.6079	0.13393	-1.5159	-19.294	-20.627	2.5287	8.7215	8.8861	26.6	14.175
12:57:50	-3.9439	4.1765	-1.3898	-26.092	-20.415	-0.18068	0.41641	0.20909	-17.565	-19.631	3.0255	8.3652	5.2352	23.553	12.138
12:57:51	-3.1718	5.9359	-0.50214	10.926	-16.959	1.1224	1.4519	1.9004	-9.7955	-20.573	2.1313	5.1582	5.4011	20.94	10.94
12:57:52	-3.4807	4.9691	-1.2393	-21.337	-17.262	0.11893	0.64529	0.47171	-15.845	-20.934	2.4294	7.2962	7.7244	22.464	12.617
12:57:53	-4.3469	3.8418	-1.6963	-33	-21.271	-0.39679	0.2214	-0.55359	-18.829	-19.933	2.6778	7.4744	5.4011	24.423	11.779
12:57:54	-3.8712	3.8257	-1.7534	-37.733	-22.398	-0.8256	0.12736	-0.68175	-20.417	-21.826	2.9261	8.187	7.5585	25.73	13.456
12:57:55	-4.1327	4.2755	-1.6183	-42.308	-19.92	-1.0172	0.11421	-0.30356	-21.084	-23.787	2.8765	7.8307	10.214	24.641	12.857
12:57:56	-3.8238	4.6666	-1.2185	-19.094	-17.881	-0.0137	0.63838	0.59358	-15.775	-21.736	2.6281	6.9399	6.3968	23.77	11.898
12:57:57	-2.7045	5.5315	-0.47586	6.6436	-16.956	0.91127	1.2905	2.2597	-8.7505	-16.33	1.8829	4.8019	3.0779	20.07	11.779
12:57:58	-4.0124	4.6666	-1.1822	-18.801	-18.738	-0.04646	0.63838	0.59988	-14.063	-16.408	3.0752	8.0089	8.5541	23.335	11.659
12:57:59	-4.1068	4.5004	-1.4261	-44.359	-17.471	-0.06284	0.10765	0.20279	-20.034	-20.276	3.2739	7.6525	5.4011	24.206	12.498
12:58:00	-3.691	4.3077	-1.3898	-32.797	-17.069	-0.57514	0.30231	0.20909	-17.643	-20.746	2.4791	7.6525	6.5628	24.641	11.659
12:58:01	-3.9052	5.1566	-1.2085	-11.894	-16.615	0.04522	0.86035	0.24058	-12.8	-19.973	2.6281	7.4744	7.3925	22.464	12.018
12:58:02	-2.5715	6.0055	-0.67266	8.751	-20.053	1.1535	1.4184	2.3438	-9.4705	-20.802	1.8333	5.1582	4.4054	20.07	10.82
12:58:03	-4.0557	3.8872	-2.205	-42.308	-23.305	-1.3691	0.04679	-1.4696	-21.084	-23.835	3.2242	6.7617	7.2266	26.165	12.498
12:58:04	-4.1797	4.6211	-1.379	-9.9665	-18.587	-0.22163	0.81299	0.68395	-14.573	-21.164	2.5287	7.6525	6.5628	24.423	12.258
12:58:05	-3.6995	4.8915	-1.3798	-21.292	-17.017	-0.35743	0.63181	-0.1439	-15.582	-19.503	2.9758	7.6525	7.5585	22.682	11.898
12:58:06	-4.3255	3.9033	-1.6546	-37.598	-18.534	-0.5392	0.14084	-0.30986	-19.627	-20.384	2.8765	8.7215	8.5541	23.988	12.977
12:58:07	-3.1805	4.9478	-1.0834	-5.335	-20.467	0.53637	0.96097	0.97176	-13.577	-20.874	2.4294	6.5835	3.2438	23.117	10.94
12:58:08	-3.8024	4.3934	-1.7888	-30.701	-22.745	-0.15611	0.36281	0.1398	-18.429	-21.501	2.33	5.6927	4.5714	24.206	12.378
12:58:09	-3.7253	3.8953	-1.738	-39.908	-22.026	-0.50803	0.09382	-0.79731	-20.092	-21.53	2.6281	7.4744	8.5541	25.077	12.617
12:58:10	-3.8624	5.0468	-1.4161	-21.123	-16.814	-0.2396	0.65878	-0.1502	-14.594	-17.848	3.0752	6.2272	7.2266	21.811	12.977
12:58:11	-3.7423	5.3815	-1.1196	-14.091	-13.53	-0.07262	0.85378	0.96546	-12.607	-16.507	2.3797	6.7617	4.9033	20.287	9.9812
12:58:12	-3.8967	4.7201	-1.223	-25.552	-13.571	-0.17249	0.51079	1.184	-14.405	-16.745	2.6778	7.8307	5.2352	22.029	10.461
12:58:13	-3.412	6.3724	-0.75605	25.271	-11.241	0.78842	1.8015	1.8563	-4.1744	-14.875	2.3797	6.2272	3.5757	17.893	7.8244
12:58:14	-2.9447	5.7484	-0.79233	2.1473	-13.988	0.57732	1.2369	1.85	-8.9563	-15.892	2.33	5.5145	5.733	20.505	8.1838
12:58:15	-4.317	4.0747	-1.9828	-32.583	-17.878	-0.7569	0.26185	-2.0222	-16.393	-17.956	3.2242	7.4744	8.2223	24.423	10.82
12:58:16	-3.7982	4.1363	-1.8268	-37.26	-19.699	-0.66681	0.18129	-1.5222	-17.652	-18.735	2.8268	7.8307	6.7287	24.859	10.461
12:58:17	-4.3856	3.8096	-1.9619	-42.027	-20.128	-0.62269	0.03331	-1.9004	-19.438	-18.424	2.7771	8.187	6.8947	25.077	11.779
12:58:18	-3.7511	3.9033	-2.1124	-37.316	-17.786	-0.65862	0.14084	-2.163	-17.981	-16.012	3.2739	8.3652	8.0563	24.859	11.779
12:58:19	-3.5535	5.8341	-1.183	4.1308	-15.246	0.76385	1.2974	-0.22797	-10.401	-15.262	1.9326	5.1582	6.0649	21.593	10.58
12:58:20	-3.4122	4.123	-1.8594	-19.004	-15.516	-0.01529	0.54399	-2.9468	-15.248	-17.777	2.5287	6.5835	7.5585	24.423	10.461
12:58:21	-4.4113	3.9114	-2.2275	-35.051	-16.216	-0.77328	0.18786	-3.2472	-17.779	-19.518	3.3732	7.4744	6.5628	24.641	12.378
12:58:22	-3.7253	4.0586	-2.2484	-37.677	-18.887	-0.50803	0.16781	-3.369	-20.088	-22.913	2.4791	8.7215	7.0606	25.947	11.419
12:58:23	-4.6343	2.5966	-2.8196	-56.405	-21.326	-0.73894	-0.45108	-4.6507	-25.256	-24.957	3.2242	9.6123	10.048	28.995	13.935
12:58:24	-3.9912	3.0946	-2.5965	-47.221	-21.441	-0.99258	-0.18208	-4.3754	-23.725	-23.28	2.9758	8.187	10.38	28.995	13.576
12:58:25	-3.5836	3.8981	-1.9628	-17.246	-22.218	0.32025	0.55056	-2.7282	-18.009	-22.18	1.8829	5.1582	7.2266	27.253	13.336
12:58:26	-3.8626	2.6207	-2.524	-49.745	-25.014	-1.0433	-0.31001	-4.3628	-25.441	-25.366	3.0255	8.3652	9.052	29.213	14.415
12:58:27	-4.5229	2.6742	-2.544	-56.687	-27.244	-1.158	-0.43759	-3.6569	-26.902	-28.067	3.0752	9.9687	9.218	30.519	16.691
12:58:28	-4.1155	2.7064	-2.4706	-47.12	-25.384	-0.64885	-0.2495	-2.8164	-23.133	-26.124	2.8765	8.5434	9.5498	29.213	15.493
12:58:29	-4.2227	3.3517	-2.1687	-40.111	-24.19	-0.74052	-5.70E-04	-1.4633	-21.277	-23.371	3.3235	8.187	10.214	28.342	15.853
12:58:30	-4.0212	3.5151	-1.748	-37.834	-24.332	-0.63247	0.07342	-0.44432	-21.01	-21.853	2.9261	8.187	9.7158	27.689	14.654
12:58:31	-2.9104	5.6333	-0.37248	13.078	-21.754	0.51021	1.445	2.0412	-10.252	-19.94	1.9326	6.2272	5.4011	22.029	12.737
12:58:32	-3.7511	4.9397	-1.2185	-7.5775	-21.692	-0.65862	0.91395	0.59358	-13.647	-22.398	2.8765	6.9399	6.7287	22.682	13.216
12:58:33	-3.7423	3.6249	-1.8414	-28.436	-21.692	-0.07262	0.275	-0.57879	-18.228	-22.398	2.9758	7.2962	7.2266	25.077	13.816
12:58:34	-4.1755	4.4791	-1.6546	-28.267	-19.244	-0.73233	0.42332	-0.30986	-17.24	-18.424	2.5784	8.0089	7.5585	24.641	12.857
12:58:35	-3.7168	4.3773	-1.3852	-35.31	-20.619	-0.72573	0.26877	-0.38133	-19.294	-20.823	3.0255	8.8997	8.5541	25.294	12.378
12:58:36	-4.317	4.0586	-1.5866	-37.699	-20.833	-0.7569	0.16781	0.29315	-20.219	-23.483	3.0255	7.4744	8.2223	25.512	12.737
12:58:37	-2.5586	5.8313	-0.59469	-19.241	-18.987	1.2288	0.84064	2.5938	-16.631	-21.619	1.8333	4.4455	6.2309	21.811	10.58
12:58:38	-4.1413	3.5179	-1.7443	-14.947	-20.781	-0.79944	0.53017	-1.8626	-17.61	-22.239	2.4294	7.8307	7.3925	26.165	13.456
12:58:39	-3.9312	3.0303	-2.5803	-65.826	-23.807	-0.90909	-0.55827	-3.6632	-28.17	-27.239	3.2739	9.6123	9.5498	30.301	14.535
12:58:40	-4.8317	1.2737	-3.1415	-80.137	-27.221	-1.3577	-1.1371	-5.2978	-33.594	-31.688	3.2242	9.0778	12.371	33.784	16.572
12:58:41	-3.9183	2.3395	-2.9601	-63.786	-25.284	-0.83379	-0.6326	-5.2663	-29.285	-27.418	2.7771	9.256	12.371	31.607	16.092
12:58:42	-4.4413	2.1467	-2.8767	-52.202	-24.744	-0.41317	-0.43793	-4.7788	-26.762	-28.018	3.1248	9.4342	11.043	31.39	18.009
12:58:43	-3.2534	2.7172	-2.4514	-22.429	-26.339	0.37758	0.25426	-4.3502	-22.231	-30.764	2.4791	6.4054	8.5541	30.301	15.014
12:58:44	-4.7415	1.1104	-3.4062	-82.842	-31.21	-0.83061	-1.211	-5.8167	-36.363	-32.921	3.1248	8.8997	11.043	36.397	19.447
12:58:45	-4.2142	0.68188	-3.3645	-94.415	-31.934	-0.95823	-1.5136	-5.573	-38.82	-35.746	2.9758	10.681	12.371	35.961	19.687
12:58:46	-4.8402	1.2709	-3.0164	-103.69	-32.084	-1.14	-1.5938	-4.5666	-40.877	-36.62	3.3235	11.038	12.869	34.873	21.484
12:58:47	-4.0941	1.7557	-2.476	-75.573	-27.02	-0.79125	-0.9621	-3.0538	-32.993	-29.108	3.2739	8.8997	12.039	31.825	21.005
12:58:48	-4.6902	2.1842	-2.4389	-64.057	-27.414	-1.3331	-0.65957	-2.2197	-30.865	-31.876	2.5287	9.7905	11.873	32.478	20.286
12:58:49	-2.9274	3.9355	-1.1196	-29.202	-25.006	0.94562	0.32893	0.96546	-22.705	-28.141	2.2307	7.4744	8.7201	26.818	16.452
12:58:50	-4.3384	2.7571	-1.7226	-77.456	-24.249	-0.6145	-0.83383	-0.91288	-30.956	-27.007	3.1248	8.7215	9.7158	30.301	18.009
12:58:51	-3.9011	3.7774	-1.5666	-51.909	-22.247	-0.46549	-0.15477	-0.41283	-25.051	-26.582	3.2242	8.3652	8.0563	26.818	17.89
12:58:52	-4.0768	3.1884	-1.6337	-42.59	-21.455	-0.42295	-0.07456	-0.18799	-22.73	-23.359	2.8765	9.4342	8.2223	27.471	16.572
12:58:53	-3.9825	3.0705	-2.0127	-54.343	-24.122	-0.40657	-0.32315	-0.96327	-26.24	-28.142	3.1248	8.8997	10.877	29.648	16.811
12:58:54	-4.1325	2.8295	-1.7271	-56.822	-24.829	-0.21344	-0.41063	-0.32246	-27.692	-27.108	3.2242	7.118	10.711	30.301	15.493
12:58:55	-2.8545	5.3119	-0.78775	-12.581	-19.893	1.1044	0.88732	1.2596	-16.816	-23.628	2.2307	5.6927	6.3968	23.335	15.373
12:58:56	-3.7166	4.704	-1.2964	-30.622	-17.457	0.07798	0.41675	0.34354	-17.969	-20.197	2.0816	7.8307	6.5628	23.988	14.295
12:58:57	-3.8882	4.2514	-1.4832	-48.878	-15.805	-0.39019	-0.02685	0.07463	-20.372	-18.059	2.7274	7.2962	6.5628	22.682	14.654
12:58:58	-3.7939	4.953	-1.5095	-25.529	-13.174	-0.37381	0.55125	-0.28466	-14.273	-15.365	2.7771	7.8307	5.733	22.247	11.539
12:58:59	-3.9353	4.4791	-1.4832	-27.794	-13.232	-0.39838	0.42332	0.07463	-14.475	-14.295	2.7274	8.0089	6.7287	22.682	11.179
12:59:00	-3.5493	4.9772	-1.2447	-18.801	-15.558	0.25314	0.69232	0.23429	-14.063	-17.553	2.1313	5.6927	6.7287	22.9	8.9028
12:59:01	-3.1892	4.9932	-1.0534	-14.271	-15.355	-0.04964	0.78636	-0.08721	-13.66	-15.898	2.2307	5.5145	6.5628	23.988	9.7416
12:59:02	-4.2655	3.1803	-2.3826	-44.517	-19.293	-0.45571	-0.12157	-2.9194	-20.956	-20.593	2.9758	9.7905	9.218	27.036	12.977
12:59:03	-4.1284	3.6623	-2.3672	-39.694	-16.445	-0.72414	0.05337	-3.0349	-18.841	-16.627	2.9758	7.4744	7.8904	26.165	11.898
12:59:04	-4.0598	4.2461	-1.9982	-28.008	-15.794	-0.85836	0.38287	-1.9067	-15.726	-17.054	2.8765	7.8307	6.3968	24.206	11.779
12:59:05	-4.034	4.8834	-1.6663	-23.061	-12.657	-0.70776	0.58479	-1.6126	-12.887	-12.344	2.8268	8.187	5.899	22.464	9.9812
12:59:06	-3.7637	5.2692	-1.2619	20.752	-12.475	0.06979	1.5187	-1.3058	-4.5119	-13.161	2.3797	5.6927	4.9033	20.723	9.5019
12:59:07	-3.305	5.2692	-1.2619	20.482	-14.836	0.07639	1.5187	-1.3058	-6.092	-13.802	2.6281	5.5145	6.3968	22.029	6.9856
12:59:08	-4.5528	3.3517	-2.4969	-39.615	-17.314	-0.79785	-5.70E-04	-3.1757	-18.38	-17.009	2.9758	9.4342	10.38	26.818	10.461
12:59:09	-4.0812	3.8872	-2.4143	-42.139	-19.877	-0.71595	0.04679	-3.5161	-20.096	-19.306	2.7274	7.4744	8.5541	25.73	9.2623
12:59:10	-4.7544	2.9393	-2.5285	-46.658	-19.175	-0.90591	-0.20905	-3.7724	-20.434	-18.49	2.7274	8.3652	9.218	27.036	12.258
12:59:11	-4.0812	4.364	-2.1495	-16.289	-15.166	-0.71595	0.63147	-2.9971	-12.413	-14.323	3.0255	8.7215	6.7287	25.077	10.82
12:59:12	-3.8109	4.8943	-1.7551	2.1473	-15.788	0.0616	1.0885	-2.3374	-8.9563	-14.199	2.2803	5.1582	4.5714	21.593	9.2623
12:59:13	-3.4294	4.3157	-1.9782	-30.487	-20.084	-0.38359	0.34933	-2.6127	-17.178	-19.573	2.3797	6.049	6.7287	25.294	8.9028
12:59:14	-4.6987	3.4909	-2.3726	-44.449	-20.113	-1.1154	-0.06764	-3.2724	-20.561	-18.807	2.7771	9.0778	9.218	27.253	11.898
12:59:15	-4.0469	3.1107	-2.6999	-42.004	-18.841	-0.78306	-0.08805	-4.1569	-19.306	-19.357	2.7274	7.4744	8.5541	26.818	11.898
12:59:16	-4.6858	4.0265	-2.4823	-46.478	-17.027	-1.0401	-0.02027	-4.1191	-19.38	-15.803	3.0752	6.7617	6.5628	25.077	11.179
12:59:17	-4.1585	3.2125	-2.4252	-35.074	-17.546	-1.1677	0.06651	-3.991	-17.911	-17.898	2.7771	8.8997	7.7244	26.165	11.179
12:59:18	-3.4078	6.0779	-1.1005	29.925	-13.045	0.27771	1.8416	-0.56837	-3.0468	-11.795	2.1313	4.8019	3.5757	20.287	7.8244
12:59:19	-3.3351	5.0496	-1.6046	2.305	-13.304	-0.36721	1.1155	-2.0748	-8.0346	-13.305	1.9326	5.5145	4.4054	24.206	9.2623
12:59:20	-4.7675	4.1069	-2.155	-23.32	-15.206	-1.7849	0.44995	-3.2346	-14.401	-15.024	2.8765	8.7215	7.5585	25.73	8.9028
12:59:21	-3.9054	3.9596	-2.3472	-20.943	-14.296	-0.75849	0.47	-3.7409	-13.541	-14.403	3.0255	7.2962	9.052	25.512	10.7
12:59:22	-4.4714	4.1765	-2.1704	-25.608	-14.747	-0.85677	0.41641	-3.119	-14.734	-16.101	2.8268	7.6525	7.2266	24.641	9.0226
12:59:23	-3.7511	4.8005	-2.0662	-2.3265	-11.346	-0.65862	0.98103	-2.5097	-9.0305	-11.731	2.4294	8.3652	6.0649	23.117	10.341
12:59:24	-3.6521	5.6816	-0.92456	27.806	-8.7918	0.45447	1.7272	-0.77431	-2.3926	-11.364	1.9823	4.4455	3.2438	20.505	7.8244
12:59:25	-3.1377	6.0296	-1.4224	16.256	-8.5087	0.25155	1.5595	-1.2155	-4.7178	-8.77	2.2307	5.1582	3.0779	21.158	6.2667
12:59:26	-4.3	4.7844	-2.1904	-6.9693	-11.134	-1.1923	0.88698	-2.413	-10.092	-13.777	2.8268	8.187	6.0649	21.811	8.064
12:59:27	-3.8196	4.7844	-2.0199	-7.0256	-10.86	-0.52441	0.88698	-2.8564	-10.421	-12.649	2.5287	6.2272	7.2266	23.117	7.7046
12:59:28	-4.2485	4.4819	-2.0253	-4.5015	-8.9043	-0.89112	0.88007	-3.0938	-8.7055	-10.613	2.181	7.4744	6.5628	21.811	8.6631
12:59:29	-4.0897	4.6746	-2.1133	-15.906	-8.2267	-0.49825	0.6854	-2.9908	-10.175	-10.881	2.8765	6.7617	6.0649	23.117	6.5063
12:59:30	-3.5622	6.1475	-0.89285	27.908	-7.4181	0.17784	1.8081	-0.17758	-1.8001	-8.5035	1.7339	4.4455	2.58	17.675	5.7874
12:59:31	-3.2578	5.5476	-1.4178	11.591	-10.059	0.08458	1.3845	-1.8059	-5.9111	-12.664	1.9823	5.6927	3.9076	18.763	6.027
12:59:32	-4.4199	5.1996	-1.6609	23.119	-10.893	-0.55558	1.5522	-1.3751	-3.7177	-10.958	2.4294	6.2272	5.2352	21.811	7.2253
12:59:33	-4.0212	4.7309	-1.8948	0.24269	-11.306	-0.63247	1.0146	-2.1252	-7.0512	-11.492	2.6778	8.3652	5.733	22.464	8.9028
12:59:34	-4.45	5.4378	-1.7643	2.5303	-12.122	-0.99918	1.1829	-1.1566	-6.7179	-11.094	2.5784	7.118	6.3968	20.505	6.9856
12:59:35	-3.7853	5.3843	-1.4324	9.562	-12.014	-0.59152	1.3105	-0.86249	-4.7303	-9.9958	2.6281	6.5835	5.5671	19.416	7.8244
12:59:36	-3.5879	6.5305	-0.8086	48.62	-12.219	0.02725	2.2852	1.1377	1.9243	-10.726	2.0816	6.2272	4.0736	17.893	5.3081
12:59:37	-3.2792	6.2413	-0.89743	32.686	-10.817	0.22698	1.9156	0.41283	0.05169	-8.1681	1.8829	5.1582	3.7416	18.11	5.9072
12:59:38	-4.1841	5.5074	-1.3435	0.32153	-11.858	-0.51463	1.1494	-0.1376	-6.5904	-11.434	2.4791	6.9399	4.9033	18.546	7.2253
12:59:39	-3.7039	5.9894	-0.89114	4.8179	-10.23	-0.65043	1.3243	1.4781	-6.3845	-10.843	2.4791	6.4054	4.4054	18.546	6.5063
12:59:40	-4.1369	6.3857	-0.78233	7.0604	-9.9381	-0.50644	1.4388	1.497	-6.3145	-11.486	2.2803	7.2962	3.5757	18.546	5.7874
12:59:41	-3.2192	5.9894	-0.75605	4.7277	-10.874	0.31047	1.3243	1.8563	-6.9112	-12.729	1.9823	5.1582	3.7416	18.328	7.2253
12:59:42	-3.3648	6.9614	-0.3045	16.233	-10.491	0.79661	1.7213	2.6442	-4.8494	-11.428	1.7836	4.98	1.5843	17.24	5.7874
12:59:43	-3.5366	5.336	-1.0888	-4.8056	-15.547	-0.47527	1.0284	0.73434	-10.483	-16.548	2.5287	6.5835	5.2352	20.07	8.1838
12:59:44	-4.3513	5.2958	-1.2547	-16.198	-16.602	-0.6898	0.79327	0.58728	-11.887	-14.726	2.7274	7.2962	6.5628	21.811	9.7416
12:59:45	-4.0812	5.2503	-1.369	-7.0819	-17.371	-0.71595	0.96788	0.33095	-10.751	-16.402	2.7274	8.187	6.7287	22.247	9.2623
12:59:46	-4.1627	5.2986	-1.4524	6.8464	-15.279	-0.65704	1.25	-0.1565	-7.5654	-13.571	2.3797	6.5835	6.3968	21.811	10.341
12:59:47	-3.6952	6.5197	-0.90743	23.31	-9.7749	-0.06443	1.7814	0.76583	-2.5985	-10.532	2.3797	6.7617	3.7416	18.763	8.3037
12:59:48	-2.7045	7.2294	-0.00975	48.823	-14.756	0.91127	2.4065	2.1041	3.1094	-9.0024	1.8829	3.3765	0.92053	16.804	5.0684
12:59:49	-4.1498	6.2948	-1.4124	25.654	-7.8595	-0.58174	1.788	-1.5685	-1.9359	-8.7344	2.2803	6.4054	4.0736	19.634	7.3451
12:59:50	-3.6438	5.229	-1.8902	9.5845	-9.8861	-0.56695	1.2836	-2.7156	-4.5986	-10.243	2.7274	7.4744	4.7373	21.158	7.7046
12:59:51	-4.4072	5.0226	-1.9945	-27.332	-12.278	-1.284	0.51771	-3.325	-11.776	-9.6558	2.7771	6.5835	4.9033	21.593	6.9856
12:59:52	-3.7768	5.3791	-1.6517	30.24	-12.176	-0.80922	1.7202	-2.556	-1.2034	-11.412	2.4791	6.049	5.0692	20.94	7.2253
12:59:53	-3.1547	7.3553	-0.45131	62.695	-6.8295	0.68696	2.7022	0.96327	5.9654	-6.473	1.4855	3.5547	1.5843	14.845	4.5891
12:59:54	-3.5711	7.0447	-0.58011	62.481	-7.0582	-1.2119	2.6482	1.6504	4.7145	-8.7495	2.0816	5.1582	4.5714	16.804	4.8288
12:59:55	-3.957	5.9037	-0.90743	2.519	-10.065	-1.0597	1.2638	0.76583	-6.7837	-10.352	2.5287	6.4054	4.0736	19.199	6.5063
12:59:56	-3.708	5.7725	-1.1822	9.3593	-12.782	-0.13973	1.3779	0.59988	-5.9153	-12.135	2.7771	7.2962	4.5714	18.546	5.7874
12:59:57	-3.7467	6.3297	-0.72064	57.872	-9.7934	-0.36562	2.4328	1.0347	3.8503	-8.7617	2.5784	5.5145	5.4011	17.022	5.0684
12:59:58	-3.3607	7.2909	-0.67437	44.259	-6.3262	0.2859	2.326	0.68806	2.5085	-8.6995	2.0816	4.4455	2.0822	15.933	4.3495
12:59:59	-3.3949	7.299	-1.2873	46.513	-6.4412	0.35301	2.373	-0.8373	2.6444	-7.0226	1.8829	4.98	2.9119	16.151	5.1882
13:00:00	-3.7083	5.0898	-1.9273	14.205	-10.438	-0.94344	1.3506	-3.5498	-3.6685	-10.648	2.6281	5.8709	6.5628	21.158	6.8658
13:00:01	-4.2699	5.7271	-1.5212	18.791	-10.831	-0.74871	1.5525	-1.5874	-2.936	-8.2476	2.6281	7.8307	5.2352	19.199	5.6675
13:00:02	-3.8539	6.4207	-0.88115	39.751	-6.6588	-0.4573	2.0836	1.1251	2.2368	-8.2945	2.33	5.5145	4.4054	17.022	5.4279
13:00:03	-3.5024	6.8572	-0.57469	53.499	-5.5163	-0.54238	2.4332	1.8878	4.3686	-6.7848	2.2803	7.118	3.9076	16.151	4.8288
13:00:04	-3.2834	7.8132	-0.03974	60.463	-7.559	0.73769	2.7361	3.1631	5.9612	-7.4481	1.6842	3.0202	2.0822	13.539	3.0314
13:00:05	-3.1248	6.718	-0.77776	57.894	-11.82	0.32685	2.5003	0.90658	3.9819	-10.271	1.9326	6.2272	3.2438	17.675	5.0684
13:00:06	-3.8281	5.7967	-1.6037	16.256	-11.308	-0.3067	1.519	-1.247	-4.7178	-10.567	2.6778	5.8709	5.2352	20.07	7.4649
13:00:07	-4.3041	5.0335	-1.8956	-2.3265	-11.865	-0.68161	1.0215	-2.9531	-9.0305	-14.289	2.8268	7.8307	6.3968	21.811	7.4649
13:00:08	-3.6781	4.8086	-2.0353	-0.0727	-13.266	-0.49984	1.028	-2.7408	-8.8947	-12.141	2.7274	5.8709	5.899	22.682	8.4235
13:00:09	-3.9611	5.2262	-1.6971	-13.776	-14.85	-0.54898	0.82681	-1.3814	-10.763	-13.882	2.9261	8.0089	5.4011	21.376	8.5433
13:00:10	-3.3434	7.1034	-0.3045	34.872	-8.5606	0.6542	2.1109	2.6442	-0.20748	-10.013	2.032	4.0892	1.7503	16.369	6.8658
13:00:11	-2.7432	7.8506	-0.06601	48.733	-7.3365	0.68537	2.5144	2.8038	2.5827	-8.0265	1.6842	4.2674	2.0822	15.933	6.1468
13:00:12	-3.8454	6.2091	-1.3027	23.175	-12.793	-0.675	1.7275	-0.72173	-3.3885	-13.139	2.3797	6.4054	4.2395	18.763	6.8658
13:00:13	-4.3343	5.1461	-1.8122	30.038	-12.812	-1.1252	1.6798	-2.4656	-2.3884	-11.368	2.4791	7.118	5.2352	21.158	7.9442
13:00:14	-3.7639	5.9226	-1.969	30.218	-8.3145	-0.73392	1.8146	-3.7935	-1.335	-9.0448	2.5784	7.2962	4.9033	20.287	7.1054
13:00:15	-3.7596	6.0699	-1.2556	27.93	-8.9711	-0.44092	1.7946	-0.24057	-1.6684	-11.473	2.33	6.2272	4.7373	19.416	6.5063
13:00:16	-2.9017	7.1839	-0.18569	57.951	-11.217	1.0962	2.5812	2.3101	4.3111	-8.6232	1.6346	4.6237	1.7503	15.28	4.3495
13:00:17	-3.215	6.9775	-0.53299	21.011	-10.796	-0.20023	1.8153	2.1315	-2.9977	-10.864	2.6281	4.6237	3.4098	16.369	5.7874
13:00:18	-3.631	5.8582	-1.2864	11.714	-10.114	-0.49165	1.4384	-0.00945	-5.187	-12.982	2.4791	7.4744	4.9033	19.852	7.3451
13:00:19	-4.39	4.3346	-2.0253	-2.2702	-12.66	-0.91569	0.90012	-3.0938	-8.7013	-11.419	2.6778	6.4054	6.0649	22.029	8.064
13:00:20	-4.0469	5.0978	-2.2067	16.177	-13.748	-0.78306	1.3977	-3.1253	-5.1786	-12.611	2.7771	7.6525	5.733	22.247	8.3037
13:00:21	-3.4766	6.3591	-1.0734	43.932	-10.088	-0.39178	2.1642	0.61877	0.59925	-12.361	2.4791	5.8709	4.4054	18.546	6.746
13:00:22	-2.9617	7.7757	0.1996	71.564	-8.8252	1.0127	2.9577	4.1506	5.6529	-9.2106	1.7339	3.5547	1.7503	14.192	5.1882
13:00:23	-3.7338	6.0055	-1.2085	9.1678	-15.62	-0.29032	1.4184	0.24058	-7.0345	-15.096	2.5784	6.9399	4.9033	19.199	7.8244
13:00:24	-3.7382	4.5193	-2.0507	-16.469	-16.373	-0.58333	0.65844	-2.6253	-13.467	-17.617	2.6778	6.5835	6.8947	23.117	8.1838
13:00:25	-4.3299	4.0828	-2.3263	-30.296	-14.005	-0.8322	0.30888	-3.6191	-16.059	-14.584	2.6778	8.5434	7.5585	23.988	9.5019
13:00:26	-4.3085	4.5487	-1.7588	-30.307	-17.19	-0.97461	0.38978	-0.91918	-16.125	-16.757	2.8765	7.4744	7.0606	23.335	9.9812
13:00:27	-3.2192	5.9681	-0.92742	20.493	-16.43	0.31047	1.64	1.4718	-6.0261	-17.01	2.181	5.8709	4.5714	19.634	8.9028
13:00:28	-3.1462	6.584	-0.62724	40.958	-14.87	0.46926	2.1576	1.1692	-3.7501	-16.354	2.181	5.6927	3.5757	18.328	7.8244
13:00:29	-4.45	3.7295	-2.3572	1.3025	-21.734	-0.99918	0.88629	-3.3879	-13.894	-22.174	2.8268	6.9399	8.7201	25.294	10.94
13:00:30	-4.3472	2.8564	-2.9855	-26.509	-25.482	-1.2005	0.18718	-4.7977	-20.001	-25.755	2.6778	9.6123	9.3839	28.342	12.857
13:00:31	-4.0727	3.4213	-1.8839	-42.612	-22.656	-0.93366	-0.03411	-1.6504	-22.861	-23.799	2.7274	8.8997	8.7201	27.253	13.816
13:00:32	-4.6044	2.8295	-2.0699	-56.574	-25.041	-1.0991	-0.41063	-1.0914	-26.244	-25.525	2.9758	8.187	9.052	26.383	14.774
13:00:33	-3.8838	3.6865	-1.7271	-33.642	-29.078	-0.09719	0.19443	-0.32246	-22.581	-29.388	2.4294	8.7215	8.7201	26.6	14.894
13:00:34	-3.2104	3.3545	-2.5231	-17.798	-27.09	0.89648	0.45618	-3.535	-21.235	-29.043	2.1313	6.9399	8.5541	28.124	15.253
13:00:35	-4.5443	1.4881	-3.1823	-41.215	-30.303	-1.0156	-0.32418	-4.7137	-27.729	-30.912	3.3732	10.147	11.541	31.825	17.53
13:00:36	-4.8917	1.4559	-2.9113	-50.59	-35.294	-1.4412	-0.51227	-3.1294	-30.379	-34.71	3.1248	11.75	12.869	34.437	19.208
13:00:37	-4.2399	2.1226	-2.4126	-59.448	-30.24	-1.1088	-0.579	-1.8604	-30.001	-33.832	3.3235	9.6123	11.707	32.478	20.046
13:00:38	-4.2613	2.5724	-2.5068	-63.662	-24.165	-0.96642	-0.59215	-2.8227	-28.561	-27.455	2.9758	10.147	10.048	29.648	19.927
13:00:39	-4.1196	3.7106	-2.1395	-26.295	-22.662	-0.13814	0.3355	-3.3501	-18.75	-21.486	2.4791	7.4744	7.8904	26.165	17.051
13:00:40	-3.129	5.7886	-0.91199	12.954	-18.471	0.83756	1.472	1.3562	-10.976	-18.136	2.0816	4.8019	5.899	21.158	13.097
13:00:41	-3.5923	5.1059	-1.4361	17.766	-16.464	-0.26575	1.4447	0.55578	-8.9271	-19.562	2.5784	8.187	6.2309	21.811	12.498
13:00:42	-4.4113	3.9705	-2.0399	3.9731	-20.244	-0.77328	0.97376	-2.1504	-11.322	-21.452	2.9758	8.3652	7.8904	24.859	12.857
13:00:43	-4.7031	3.5259	-2.6428	-12.265	-19.004	-1.4084	0.57719	-4.0287	-14.972	-20.311	3.1248	8.8997	8.7201	26.165	13.216
13:00:44	-3.8882	4.7361	-1.9102	-21.393	-17.889	-0.39019	0.60484	-2.0096	-16.174	-18.96	2.8268	7.4744	7.5585	24.423	12.138
13:00:45	-3.5921	5.1111	-0.99454	-3.16	-22.001	0.53795	1.035	1.6966	-13.902	-20.446	2.2803	6.4054	5.5671	20.94	11.539
13:00:46	-4.107	3.5392	-1.5095	-31.366	-25.684	-0.86655	0.21449	-0.28466	-22.314	-27.873	3.1248	7.8307	8.2223	26.165	13.576
13:00:47	-4.2742	2.187	-3.0581	-41.124	-29.246	-1.0417	-0.20283	-4.8103	-27.202	-33.659	3.1745	9.0778	11.541	32.26	16.452
13:00:48	-4.7716	1.5738	-3.3854	-38.871	-32.053	-1.2742	-0.26368	-5.6949	-27.066	-32.681	3.2739	10.86	12.039	34.437	18.009
13:00:49	-4.6343	2.5511	-2.1895	-47.694	-28.624	-0.73894	-0.27647	-1.5852	-26.491	-28.615	2.9758	9.6123	10.38	29.213	17.77
13:00:50	-3.8065	3.2499	-1.8205	-47.706	-26.469	0.3546	-0.15511	-0.45692	-26.556	-28.704	2.9758	8.7215	9.3839	27.036	16.452
13:00:51	-3.3259	3.1803	-2.2938	-45.767	-31.613	1.8262	-0.12157	-2.1945	-28.264	-31.988	2.4294	7.6525	7.8904	27.907	16.452
13:00:52	-4.883	1.429	-3.292	-80.565	-33.124	-0.85518	-1.1101	-5.5604	-36.095	-35.181	3.0255	9.9687	11.707	32.696	19.447
13:00:53	-4.6773	1.0516	-2.8079	-55.188	-29.864	-1.2578	-0.67373	-3.348	-31.178	-34.924	3.3235	9.4342	11.707	32.043	19.687
13:00:54	-4.5273	1.705	-2.7399	-45.869	-33.247	-1.451	-0.37777	-2.7449	-28.857	-35.434	3.3235	10.325	11.707	31.607	19.567
13:00:55	-4.7072	1.6165	-3.0318	-71.257	-33.672	-0.89772	-0.89502	-4.451	-33.84	-36.973	3.1745	10.681	11.375	32.043	19.927
13:00:56	-4.7415	0.93896	-3.8007	-87.8	-34.411	-0.83061	-1.332	-6.4764	-39.268	-39.416	3.1745	9.4342	12.205	34.437	20.046
13:00:57	-3.5666	2.2699	-2.1895	-62.242	-35.891	-0.11516	-0.59906	-1.5852	-33.297	-38.67	2.6281	8.5434	9.8817	30.301	19.088
13:00:58	-4.39	1.7609	-2.7453	-96.86	-35.102	-0.91569	-1.3718	-2.9824	-40.075	-39.227	2.9261	10.681	11.873	32.478	22.563
13:00:59	-5.0502	0.70077	-3.5405	-67.369	-36.67	-1.0303	-0.96278	-5.3671	-37.19	-41.813	3.0752	10.503	13.367	35.308	22.683
13:01:00	-4.9002	-0.40523	-4.2476	-95.26	-42.103	-1.2235	-1.7023	-7.8547	-43.757	-45.379	3.4726	11.929	15.358	39.227	24.24
13:01:01	-4.4672	0.19184	-3.1652	-102.07	-39.646	-1.3675	-1.7355	-3.1735	-44.428	-44.644	3.3732	11.929	13.865	35.744	24.12
13:01:02	-5.0245	0.04178	-3.2486	-123.12	-41.037	-0.87975	-2.1722	-3.661	-41.362	-46.197	3.7209	11.572	14.03	35.308	24.48
13:01:03	-4.424	-0.38389	-3.681	-112	-47.206	-0.04487	-2.018	-5.9827	-41.684	-48.425	2.8765	9.256	14.528	37.267	24.36
13:01:04	-4.3041	-0.83371	-3.9929	-107.32	-42.571	-0.68161	-2.0049	-6.9828	-49.045	-46.232	3.2739	12.819	15.358	39.88	26.637
13:01:05	-5.016	-1.0695	-3.4925	-130.67	-45.63	-1.0975	-2.5021	-4.058	-44.13	-49.077	3.87	13.532	15.358	40.097	28.194
13:01:06	-4.9345	0.67384	-3.2077	-97.299	-37.669	-1.1564	-1.5606	-4.2451	-42.642	-40.136	3.4229	12.641	14.03	35.744	28.194
13:01:07	-4.5101	0.77842	-3.2194	-66.738	-29.093	-1.0827	-0.9493	-5.5478	-33.503	-34.173	3.3732	11.394	13.035	34.437	25.438
13:01:08	-4.6943	1.421	-2.6319	-82.616	-30.12	-0.82242	-1.1571	-3.5539	-35.046	-32.191	3.0752	9.0778	11.375	31.172	22.323
13:01:09	-3.6607	3.6008	-1.3181	-36.324	-26.003	0.67217	0.13393	-0.60616	-25.219	-27.388	2.6281	6.049	8.3882	25.512	18.129
13:01:10	-3.8367	3.2017	-2.1024	-61.273	-22.125	-0.089	-0.43725	-2.516	-27.635	-25.867	3.0752	8.5434	9.052	27.253	18.848
13:01:11	-4.643	2.4867	-2.971	-65.635	-24.515	-1.3249	-0.65265	-5.7411	-27.051	-25.742	3.2242	9.9687	9.8817	28.56	18.249
13:01:12	-4.4585	3.9222	-1.9356	-10.214	-19.441	-0.78147	0.69163	-1.5411	-16.022	-22.392	2.8765	8.0089	8.2223	24.859	14.774
13:01:13	-3.8024	4.5837	-1.6809	1.4152	-17.35	-0.15611	1.0346	-0.66915	-13.236	-19.098	2.7274	7.6525	7.7244	23.117	13.216
13:01:14	-4.0382	3.4	-2.4243	-26.351	-21.528	-0.19706	0.28157	-3.1631	-19.079	-21.906	2.7274	8.5434	8.0563	25.512	12.378
13:01:15	-3.8452	4.3185	-1.5837	-7.8478	-19.287	0.1287	0.80608	-1.953	-15.227	-22.906	2.2307	6.7617	6.5628	22.029	11.419
13:01:16	-4.0253	4.2622	-1.7688	-24.064	-18.257	-0.12176	0.47691	-0.56619	-18.746	-20.644	2.8268	8.0089	8.0563	23.77	12.977
13:01:17	-4.2528	4.0453	-1.9148	-19.297	-20.481	-1.1841	0.53051	-1.4192	-16.96	-20.953	2.8765	8.3652	7.8904	23.553	13.216
13:01:18	-4.6343	4.5704	-2.3426	20.437	-12.759	-0.73894	1.3973	-4.3313	-6.3553	-15.756	2.7771	8.7215	7.0606	23.988	12.498
13:01:19	-4.0725	5.4567	-1.64	29.869	-10.643	-0.12995	1.7337	-1.2533	-3.376	-11.377	2.5784	6.9399	4.9033	18.546	9.7416
13:01:20	-3.4037	6.0751	-0.95369	6.7901	-15.245	-0.23299	1.3849	1.1125	-7.8946	-15.725	2.3797	5.5145	4.4054	16.586	7.5847
13:01:21	-3.4462	6.7365	-0.99625	18.307	-11.825	0.85553	1.7278	0.04094	-5.767	-13.588	1.9823	5.5145	3.2438	18.328	7.3451
13:01:22	-4.5871	4.1765	-2.4614	-25.777	-15.254	-0.73075	0.41641	-3.9973	-15.722	-17.654	2.8268	8.5434	8.0563	22.464	9.8614
13:01:23	-3.9912	4.4658	-1.7643	-9.7299	-18.167	-0.99258	0.78602	-1.1566	-13.191	-18.237	2.7771	6.7617	6.3968	20.94	9.2623
13:01:24	-4.2183	4.7792	-1.5612	13.112	-15.968	-0.44752	1.2967	-0.17539	-10.055	-19.013	2.8268	8.187	6.3968	20.94	9.3821
13:01:25	-4.8144	3.9596	-2.5186	-21.495	-18.231	-0.9894	0.47	-4.1254	-16.767	-20.023	2.8765	8.8997	7.2266	23.553	10.7
13:01:26	-3.515	4.6907	-1.8794	-12.355	-20.978	0.18603	0.77945	-2.2408	-15.499	-21.039	2.1313	6.4054	7.0606	22.682	9.8614
13:01:27	-3.6779	4.605	-1.5403	-14.643	-17.567	0.30387	0.71894	-0.05354	-15.833	-20.37	2.6778	7.118	7.2266	21.811	11.179
13:01:28	-4.6987	3.9222	-2.019	-10.102	-19.234	-1.1154	0.69163	-2.0285	-15.363	-22.125	2.8268	7.2962	8.2223	22.9	12.498
13:01:29	-4.4284	3.534	-2.5748	-10.237	-21.24	-0.33788	0.62421	-3.4257	-16.153	-21.162	2.9261	9.6123	8.2223	25.294	13.336
13:01:30	-3.974	4.506	-1.7643	1.5841	-16.435	-0.62428	1.0211	-1.1566	-12.248	-20.328	2.7771	8.187	7.0606	21.811	12.378
13:01:31	-4.407	4.4791	-1.7071	-28.526	-19.886	-0.48028	0.42332	-1.0284	-18.754	-21.236	2.4791	7.2962	6.2309	21.593	11.06
13:01:32	-4.0982	2.9876	-2.1441	-33.575	-24.489	-0.28055	0.07308	-2.7597	-22.186	-25.12	2.2307	7.2962	7.3925	24.859	11.179
13:01:33	-4.3557	2.6126	-2.7462	-52.382	-25.03	-0.9828	-0.35703	-3.8102	-27.816	-29.688	3.1248	10.503	9.052	27.471	14.415
13:01:34	-4.4199	2.8323	-2.5168	-33.946	-27.339	-0.55558	0.04611	-2.4697	-24.359	-28.623	3.1248	9.9687	10.214	27.689	16.572
13:01:35	-5.076	1.9379	-2.9121	-45.564	-28.317	-1.1809	-0.33732	-3.9573	-27.079	-29.642	3.3235	9.7905	10.877	30.519	17.65
13:01:36	-4.5142	2.0985	-3.0218	-65.961	-23.901	-0.57196	-0.72007	-4.804	-28.96	-28.258	3.1745	10.503	10.877	29.43	18.609
13:01:37	-3.7251	3.5686	-1.7634	-45.013	-25.44	0.29568	-0.05415	-0.32875	-23.853	-25.98	2.7771	8.8997	8.0563	26.165	15.972
13:01:38	-3.6395	4.8649	-1.301	14.589	-25.423	-0.27394	1.3572	0.93397	-14.462	-27.288	2.3797	6.4054	7.0606	24.641	14.774
13:01:39	-4.7072	3.0439	-2.8767	-17.866	-25.471	-0.89772	0.40224	-4.7788	-21.63	-29.919	2.9261	8.0089	9.7158	29.648	16.691
13:01:40	-4.583	2.5217	-2.6319	-33.991	-29.103	-1.2415	-0.00782	-3.5539	-24.622	-30.472	3.1745	9.6123	9.7158	28.342	17.29
13:01:41	-4.0768	3.0918	-2.2667	-70.75	-26.894	-0.42295	-0.63883	-1.0074	-30.878	-29.78	3.0752	9.256	8.8861	26.383	16.811
13:01:42	-4.45	2.9285	-2.4289	-73.049	-25.857	-0.99918	-0.71282	-2.5727	-31.277	-30.294	2.9261	8.5434	8.8861	26.383	17.171
13:01:43	-4.2954	2.9582	-2.1287	-19.939	-27.16	-0.0956	0.34173	-2.8753	-20.713	-28.515	2.6281	7.118	7.7244	27.471	15.853
13:01:44	-4.3127	3.6358	-1.6909	-4.0161	-26.522	-0.4639	0.77877	-0.31616	-18.906	-29.484	2.5287	8.5434	9.5498	25.73	15.613
13:01:45	-4.3941	1.9673	-2.5223	-59.752	-30.626	-0.40498	-0.60597	-2.7071	-31.778	-34.208	2.9261	10.681	10.711	30.083	18.249
13:01:46	-4.7417	0.564	-3.6447	-106.06	-35.823	-1.6343	-1.7622	-5.9764	-41.672	-38.272	3.3235	10.503	12.205	34.437	20.885
13:01:47	-4.4928	2.1037	-2.4851	-87.316	-30.251	-0.71437	-1.1298	-1.873	-36.437	-34.837	3.0752	9.4342	11.209	29.866	20.765
13:01:48	-4.6258	2.4734	-2.7345	-48.573	-34.235	-0.95664	-0.28995	-2.5075	-31.626	-37.92	3.0255	10.147	10.877	31.825	20.286
13:01:49	-4.0253	2.4843	-2.7153	-23.454	-37.888	-0.12176	0.21381	-4.0413	-28.222	-40.945	2.5287	8.8997	10.546	31.607	19.567
13:01:50	-4.407	1.5521	-2.6365	-90.324	-36.173	-0.48028	-1.2712	-2.9635	-40.984	-41.727	3.0752	9.9687	11.541	32.913	21.844
13:01:51	-4.6472	1.627	-2.7862	-113.02	-33.945	-0.81423	-1.7145	-2.3982	-43.264	-38.101	3.3732	9.9687	11.873	32.26	23.761
13:01:52	-4.8317	1.2817	-3.2866	-78.323	-34.474	-1.3577	-1.09	-5.323	-36.025	-36.496	3.3732	10.503	13.201	35.961	23.401
13:01:53	-4.4841	1.3863	-3.156	-48.663	-33.266	-0.12836	-0.47873	-4.3544	-32.153	-38.831	3.3732	10.86	12.371	32.913	21.484
13:01:54	-4.3428	2.1118	-2.1995	-85.422	-35.709	-0.9075	-1.0828	-1.2322	-38.408	-39.487	3.1248	9.7905	11.209	31.39	20.406
13:01:55	-3.5792	2.6875	-2.1278	-76.373	-36.429	0.61325	-0.80029	-2.0474	-37.667	-38.995	2.9261	6.049	9.5498	31.825	20.765
13:01:56	-4.6515	0.82914	-3.3537	-97.356	-36.256	-1.1072	-1.5336	-5.0981	-42.972	-41.741	3.1248	9.6123	12.537	36.614	23.641
13:01:57	-4.6343	0.90959	-3.1352	-74.592	-42.117	-0.73894	-1.0634	-4.2325	-40.296	-45.459	3.5222	11.038	13.699	37.267	23.881
13:01:58	-5.0376	0.22402	-3.38	-93.31	-42.579	-1.7588	-1.5474	-5.4574	-45.399	-48.162	3.4229	11.929	14.528	38.791	24.959
13:01:59	-5.0631	-0.49652	-3.6302	-143.97	-40.814	-1.1056	-2.6763	-6.9198	-41.584	-47.238	3.6713	11.929	14.694	39.227	25.798
13:02:00	-5.0332	-0.09218	-3.2132	-139.19	-43.811	-1.4658	-2.5149	-4.4825	-42.563	-47.373	3.3732	10.503	13.367	38.138	25.798
13:02:01	-3.8622	1.4238	-2.4651	-61.058	-40.911	0.56411	-0.70036	-2.579	-39.415	-46.869	2.6778	8.0089	11.707	34.002	24.12
13:02:02	-4.8917	-0.00893	-3.3391	-93.4	-41.724	-1.4412	-1.5879	-6.0415	-45.926	-47.859	3.4726	11.216	13.533	39.009	26.517
13:02:03	-4.9216	0.00156	-3.2394	-134.67	-44.183	-1.0811	-2.4073	-4.8418	-42.372	-47.669	3.6216	11.75	14.528	39.662	27.116
13:02:04	-4.9861	0.22646	-2.9067	-136.84	-39.766	-1.4576	-2.4139	-3.7198	-42.569	-46.285	3.7209	11.572	14.694	37.703	26.157
13:02:05	-4.9647	0.17575	-3.6456	-106.88	-40.044	-1.6	-1.8296	-6.8042	-46.478	-45.562	3.5719	10.503	14.528	39.009	27.116
13:02:06	-4.4113	1.4399	-2.6945	-56.168	-40.255	-0.77328	-0.60631	-3.9195	-36.905	-44.441	3.1248	9.6123	12.703	37.267	25.079
13:02:07	-3.5063	3.0786	-1.6092	-53.554	-34.051	0.77204	-0.27613	-1.4844	-34.663	-39.662	2.6281	8.3652	9.5498	33.131	22.203
13:02:08	-4.7031	0.36568	-3.3083	-141.27	-39.235	-1.4084	-2.481	-6.2727	-40.154	-43.647	3.5222	10.86	13.865	38.356	24.839
13:02:09	-4.793	0.36043	-3.1832	-120.32	-38.301	-1.1318	-2.0713	-5.5415	-46.832	-41.48	3.4229	11.038	13.533	37.92	25.678
13:02:10	-4.2271	3.2821	-2.0182	-38.927	-28.043	-1.0335	0.03297	-1.2007	-27.396	-34.145	2.7274	7.4744	9.3839	29.213	22.323
13:02:11	-4.2784	2.9957	-2.4289	-31.895	-28.449	-0.53101	0.1201	-2.5727	-25.408	-32.287	3.0752	8.3652	9.8817	29.866	19.927
13:02:12	-4.1413	3.0866	-2.5803	-49.982	-26.662	-0.79944	-0.22911	-3.6632	-26.824	-28.891	2.4791	7.6525	9.3839	28.995	18.249
13:02:13	-3.189	4.7977	-1.0417	-27.038	-23.072	0.75407	0.52428	1.2155	-23.095	-28.114	3.0255	6.049	6.3968	25.947	15.613
13:02:14	-4.2786	3.0142	-2.0599	-71.077	-28.118	-1.3347	-0.65231	-1.4444	-32.787	-31.767	3.1745	9.256	10.214	30.083	16.691
13:02:15	-4.6387	1.571	-3.2249	-62.208	-32.421	-1.0319	-0.72041	-5.7852	-33.099	-34.365	3.4726	10.147	12.703	35.526	18.489
13:02:16	-4.5101	2.1387	-2.757	-55.053	-28.128	-1.0827	-0.48496	-4.2851	-30.388	-33.234	3.3732	10.503	11.707	33.567	19.687
13:02:17	-4.0897	3.3997	-1.738	-93.807	-25.498	-0.49825	-1.0416	-0.79731	-35.265	-30.078	3.0255	9.256	9.5498	26.6	18.489
13:02:18	-3.4722	4.5889	-1.3852	-19.736	-24.265	-0.09878	0.6249	-0.38133	-19.528	-26.161	2.4791	6.5835	7.5585	26.6	15.853
13:02:19	-3.2663	4.4014	-1.5075	-29.146	-23.944	0.30228	0.40984	-3.3586	-22.375	-27.571	2.7771	6.7617	8.8861	28.342	15.613
13:02:20	-4.0812	3.4402	-2.097	-15.803	-26.187	-0.71595	0.51668	-2.2786	-22.614	-30.814	3.1248	9.4342	11.043	31.172	17.051
13:02:21	-4.1969	2.8617	-2.0082	-48.077	-29.941	-0.58993	-0.22253	-1.5537	-28.729	-32.083	3.4229	10.681	11.707	31.172	16.931
13:02:22	-4.4157	1.8708	-2.6111	-87.518	-32.681	-1.0663	-1.1702	-3.432	-37.622	-35.413	3.4229	10.86	13.201	35.09	19.447
13:02:23	-4.4328	1.4958	-2.9447	-106.07	-31.158	-0.63088	-1.6004	-5.3818	-41.737	-36.845	3.4726	9.9687	12.869	37.92	21.245
13:02:24	-3.8367	2.8669	-1.8431	-69.195	-31.31	-0.089	-0.63226	-2.2345	-34.824	-36.795	2.8765	8.8997	11.375	34.002	19.687
13:02:25	-3.9524	2.9152	-1.8631	-55.593	-35.643	0.03703	-0.35012	-1.5285	-33.548	-38.627	3.1745	9.4342	12.703	35.09	21.484
13:02:26	-4.6087	1.7505	-2.1641	-55.841	-35.666	-1.3921	-0.55238	-2.0537	-34.996	-40.174	3.7209	10.325	12.703	36.614	22.203
13:02:27	-4.6214	0.86132	-3.1578	-88.352	-36.101	-0.66364	-1.3455	-6.0101	-42.494	-42.717	3.5222	9.9687	14.03	40.75	22.683
13:02:28	-5.0247	-0.46434	-3.3145	-134.7	-40.457	-1.6835	-2.4882	-7.338	-36.465	-46.096	3.5719	11.75	15.026	42.492	24.959
13:02:29	-4.8446	0.38177	-2.5285	-136.86	-42.336	-1.433	-2.3869	-3.7724	-36.876	-46.268	3.4726	11.572	14.03	39.88	23.881
13:02:30	-3.8709	1.6165	-1.6709	-72.249	-38.39	-0.02189	-0.89502	-1.0221	-39.634	-44.349	2.7771	7.4744	11.541	36.832	23.521
13:02:31	-4.3683	2.0957	-1.7071	-90.301	-33.235	-0.25439	-1.1768	-1.0284	-40.852	-40.06	3.2739	9.6123	12.205	35.961	24.72
13:02:32	-4.4714	2.2779	-2.4931	-59.977	-30.47	-0.85677	-0.55204	-4.594	-33.095	-35.646	3.4726	10.681	13.035	36.614	24.001
13:02:33	-4.6987	1.2898	-3.2566	-76.317	-34.651	-1.1154	-1.043	-6.3819	-37.338	-37.529	3.6216	9.7905	14.196	39.88	24.001
13:02:34	-4.4199	2.3958	-2.5131	-48.494	-33.948	-0.55558	-0.30344	-3.888	-31.165	-36.713	3.6216	8.7215	12.205	35.09	21.844
13:02:35	-4.2441	2.9607	-1.7543	-64.451	-30.168	-0.59812	-0.52473	-1.5096	-33.169	-34.822	3.3235	9.6123	11.375	34.437	21.364
13:02:36	-3.1847	4.5539	-0.75148	-52.585	-25.494	1.0471	-0.01993	1.2659	-29.001	-31.465	2.6281	5.8709	7.3925	29.213	16.691
13:02:37	-3.232	4.5781	-1.5412	-45.756	-26.447	0.23517	0.12114	-0.88139	-28.198	-31.862	3.1248	7.4744	9.218	30.954	19.088
13:02:38	-4.4028	2.5161	-2.0978	-80.351	-28.408	-0.99099	-0.92131	-3.1064	-34.844	-32.048	3.4726	9.7905	10.711	32.913	18.369
13:02:39	-4.4714	1.3272	-2.8884	-87.316	-30.877	-0.85677	-1.2646	-6.0815	-36.437	-33.326	3.6713	9.256	12.371	37.485	20.166
13:02:40	-4.45	1.8869	-3.174	-82.718	-31.401	-0.99918	-1.0762	-6.7223	-35.639	-33.571	3.5719	9.256	13.699	37.92	19.567
13:02:41	-4.2142	2.7116	-2.3835	-68.587	-27.364	-0.95823	-0.65923	-3.7472	-31.268	-29.707	3.5222	10.147	11.707	32.913	18.728
13:02:42	-3.0733	4.6907	-0.9654	-13.223	-24.357	0.62804	0.77945	-0.19018	-20.569	-28.105	2.032	5.3364	6.8947	28.342	15.253
13:02:43	-3.7853	4.4521	-1.1668	-59.155	-23.484	-0.59152	-0.17449	0.48431	-28.289	-29.111	3.0752	8.0089	7.5585	29.648	14.894
13:02:44	-4.1969	3.2258	-1.6763	-54.794	-24.75	-0.58993	-0.29618	-1.2596	-28.873	-30.873	3.6713	9.6123	10.711	30.301	17.65
13:02:45	-4.3299	3.7078	-1.4578	-49.982	-23.059	-0.8322	-0.12123	-0.39393	-26.824	-28.034	3.2242	7.2962	10.048	29.213	15.613
13:02:46	-4.1755	3.7158	-1.6137	-47.661	-22.495	-0.73233	-0.07421	-0.89398	-26.293	-27.088	3.0255	9.256	9.8817	30.737	16.691
13:02:47	-3.798	3.6543	-1.3435	-43.164	-23.662	0.13689	0.00634	-0.1376	-26.087	-29.682	2.9758	7.118	7.7244	27.689	15.014
13:02:48	-3.2233	4.5193	-0.86116	-18.001	-25.607	0.82118	0.65844	0.41913	-22.42	-30.714	2.33	6.4054	6.5628	28.995	14.175
13:02:49	-4.0683	2.7116	-1.9102	-68.778	-27.083	-0.64066	-0.65923	-2.0096	-32.388	-31.356	3.2739	8.5434	11.541	34.002	17.89
13:02:50	-4.2784	2.4304	-2.5031	-82.526	-27.788	-0.53101	-0.98182	-4.241	-34.519	-31.247	3.0752	8.7215	13.533	32.913	17.051
13:02:51	-4.5229	2.0422	-2.524	-82.763	-29.743	-1.158	-1.0492	-4.3628	-35.902	-33.746	3.5222	10.681	10.711	36.179	18.609
13:02:52	-4.433	2.4465	-2.2384	-77.974	-27.886	-1.4346	-0.88777	-3.722	-33.984	-30.878	3.6713	8.5434	10.546	34.655	19.567
13:02:53	-3.8238	2.875	-2.0879	-66.299	-26.673	-0.0137	-0.58523	-3.4594	-30.935	-29.896	3.2242	9.6123	12.039	32.913	16.572
13:02:54	-3.6093	4.2272	-1.4341	-57.002	-25.608	0.16965	-0.16792	-2.5182	-28.746	-30.251	2.8765	5.5145	8.7201	29.43	16.332
13:02:55	-4.3729	2.7732	-2.1658	-73.173	-25.417	-1.3511	-0.73979	-3.7094	-32.001	-29.601	3.3235	9.9687	9.052	32.26	18.489
13:02:56	-4.3771	2.8134	-2.1758	-61.589	-23.266	-0.84039	-0.50467	-3.3564	-29.478	-27.839	3.2242	8.187	12.205	31.607	17.171
13:02:57	-4.0168	3.5899	-1.6726	-61.273	-20.895	-0.33946	-0.36983	-2.6778	-27.635	-26.193	3.0752	9.256	9.7158	29.866	15.733
13:02:58	-3.8668	4.2433	-1.6409	-51.639	-18.581	-0.5326	-0.07387	-2.0811	-23.47	-23.477	2.8765	8.0089	5.899	27.036	14.894
13:02:59	-2.9189	5.3521	-0.77776	-1.2104	-19.122	0.72791	1.1224	0.90658	-15.544	-22.877	2.6778	5.6927	7.5585	24.641	12.378
13:03:00	-3.5279	4.3692	-0.86573	-38.24	-21.488	0.11074	0.22174	1.0096	-23.38	-26.373	2.8765	6.5835	9.7158	25.947	13.456
13:03:01	-4.2742	4.0961	-1.3644	-49.655	-22.444	-1.0417	-0.05382	-0.25947	-24.915	-25.382	3.0752	9.4342	6.7287	28.777	14.654
13:03:02	-4.2827	3.8096	-1.5049	-42.635	-23.279	-0.82401	0.03331	-0.87509	-22.993	-23.213	3.1248	7.8307	11.209	27.907	14.894
13:03:03	-4.2784	3.9729	-1.6817	-40.37	-23.977	-0.53101	0.1073	-1.497	-22.791	-25.417	3.2739	9.4342	7.3925	29.648	13.935
13:03:04	-4.2613	3.5899	-1.5983	-61.262	-24.732	-0.96642	-0.36983	-1.0095	-27.569	-27.476	3.5222	7.8307	10.38	29.866	14.175
13:03:05	-3.2148	4.5487	-1.0071	-31.524	-22.77	0.60347	0.38978	-0.43392	-23.235	-27.29	2.5784	5.8709	7.8904	27.907	12.258
13:03:06	-3.8067	2.7652	-2.338	-75.461	-24.242	-0.44911	-0.78681	-4.9218	-32.334	-29.782	3.2739	8.187	9.052	32.696	15.853
13:03:07	-4.4028	2.0824	-2.8984	-70.852	-24.562	-0.99099	-0.81412	-5.7285	-31.47	-28.835	3.3235	9.0778	14.03	34.437	17.65
13:03:08	-4.0812	2.8589	-2.4252	-70.627	-25.865	-0.71595	-0.67928	-3.991	-30.153	-27.056	3.3235	9.7905	7.3925	33.131	17.051
13:03:09	-4.2827	3.2499	-1.9936	-47.492	-25.187	-0.82401	-0.15511	-2.4971	-25.306	-27.787	3.5719	7.8307	12.371	30.301	16.212
13:03:10	-4.1755	4.3157	-1.349	-31.321	-21.906	-0.73233	0.34933	-0.37504	-22.05	-25.057	3.4726	8.0089	5.5671	27.036	14.535
13:03:11	-3.0774	5.186	-0.64352	-26.655	-18.76	1.1387	0.5917	0.45692	-20.857	-23.586	2.0816	5.6927	8.7201	25.73	11.898
13:03:12	-3.5879	4.1496	-1.1568	-56.327	-19.59	0.02725	-0.1814	0.13131	-24.796	-23.267	2.8268	6.2272	6.2309	28.777	13.935
13:03:13	-4.0727	2.9205	-2.3997	-74.729	-22.37	-0.93366	-0.75984	-4.4595	-28.055	-22.13	3.4726	9.4342	11.707	33.131	15.134
13:03:14	-3.9526	4.1121	-1.8802	-44.72	-19.909	-0.76668	0.04023	-3.0686	-22.141	-22.782	3.5222	8.3652	6.3968	28.56	14.535
13:03:15	-4.0812	4.7201	-1.2402	-26.205	-17.372	-0.71595	0.51079	-0.35614	-18.224	-21.108	2.9261	6.9399	9.8817	27.471	12.737
13:03:16	-3.9225	5.2584	-1.271	-5.4251	-16.521	-0.32308	1.0149	-0.125	-14.104	-18.954	2.7771	7.4744	4.2395	23.988	12.378
13:03:17	-2.9447	5.81	-0.93913	-2.9122	-17.419	0.57732	1.1563	0.16911	-12.454	-19.033	2.5287	5.5145	7.8904	24.423	10.341
13:03:18	-3.3864	4.803	-1.9528	-46.714	-15.737	0.13531	0.11456	-3.0812	-20.763	-17.661	3.3235	6.2272	3.7416	23.335	11.419
13:03:19	-3.7168	5.1325	-1.5729	-18.993	-14.739	-0.72573	0.71928	-1.4781	-15.183	-18.876	2.8268	7.118	10.214	25.73	11.299
[truncated: 19,601 more rows]
